# Supplementary material
Source: PubMed Central journal article supplement (PMC8022667)

## Supplementary material 4: model predictions per country

### Legend

This document shows the modeling results for the countries included in the analyses. The model, together with the data from which it was estimated, is shown for each country in six graphs. The start ( $d_1$ ) and end ( $d_2$ ) dates of the lockdown transition period is marked on each graph using an orange and red vertical dashed line. These dates were estimated from Google Mobility Reports. Incidence data of confirmed cases and deaths up to 60 days after  $d_2$  was used (ECDC, <https://opendata.ecdc.europa.eu/covid19/casedistribution/csv>, accessed 6 June 2020). The data used to fit the model is shown as connected blue or orange dots. Data that was not used for fitting the model is shown in gray. The 50% and 90% cri intervals for the estimates are shown in dark gray and light gray areas.

The six charts are:

1. **Deaths per day:** Incidence plot of deaths per day. The data used to fit the model is shown as connected blue dots.
2. **Total deaths:** Cumulative plot of deaths per day. Model fitting was done on incidence data rather than cumulative data.
3. **New cases:** Incidence plot of new cases per day. The data used to fit the model is shown as connected orange dots.
4. **Infected individuals (%):** Estimated number of currently infected individuals (sum of E, In and Is compartment states), as a proportion of the population.
5. **Removed (%):** Estimated number of individuals that were removed (recovered or deceased) (R compartment state), as a proportion of the population.
6. **Effective reproduction number ( $R_e$ ):** Estimated effective reproduction number based on the model's estimate of how many new infections are being generated each day by infectious individuals.

# 1 Austria

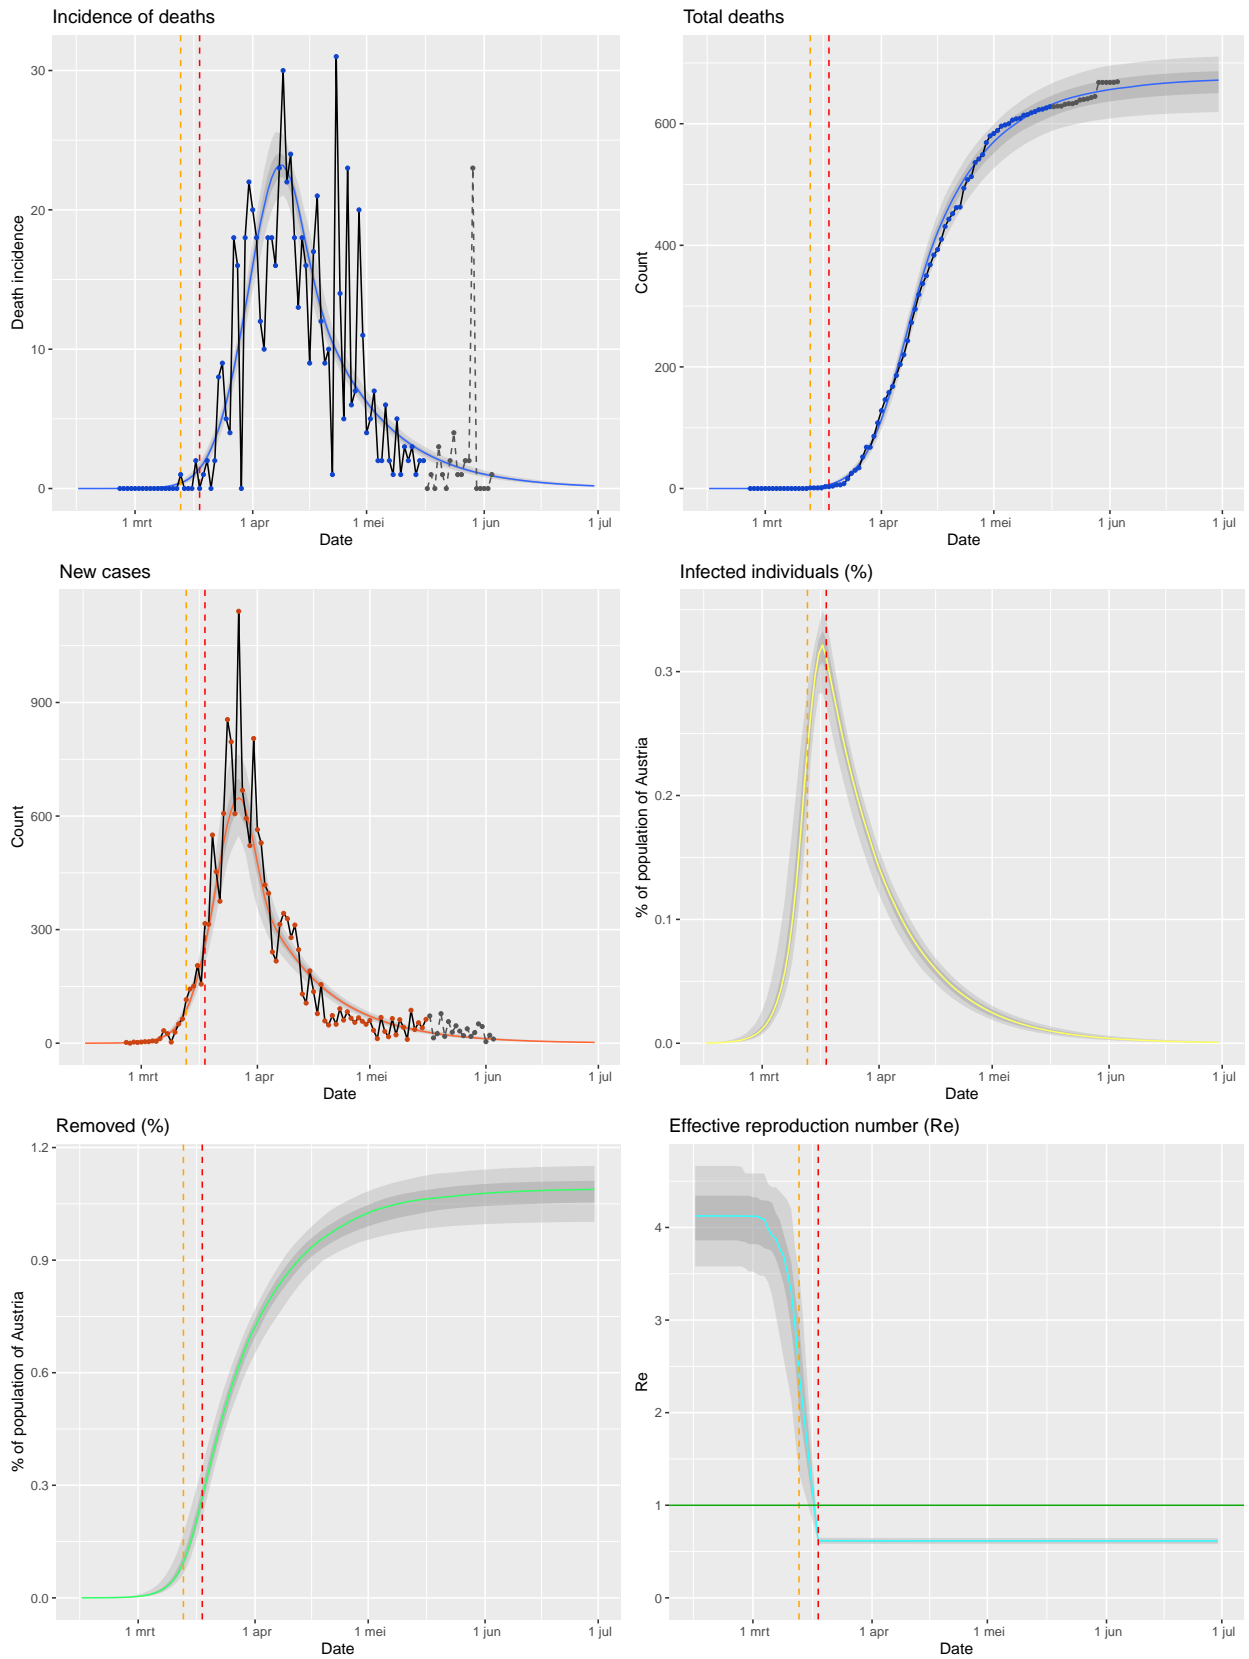

## 2 Belarus

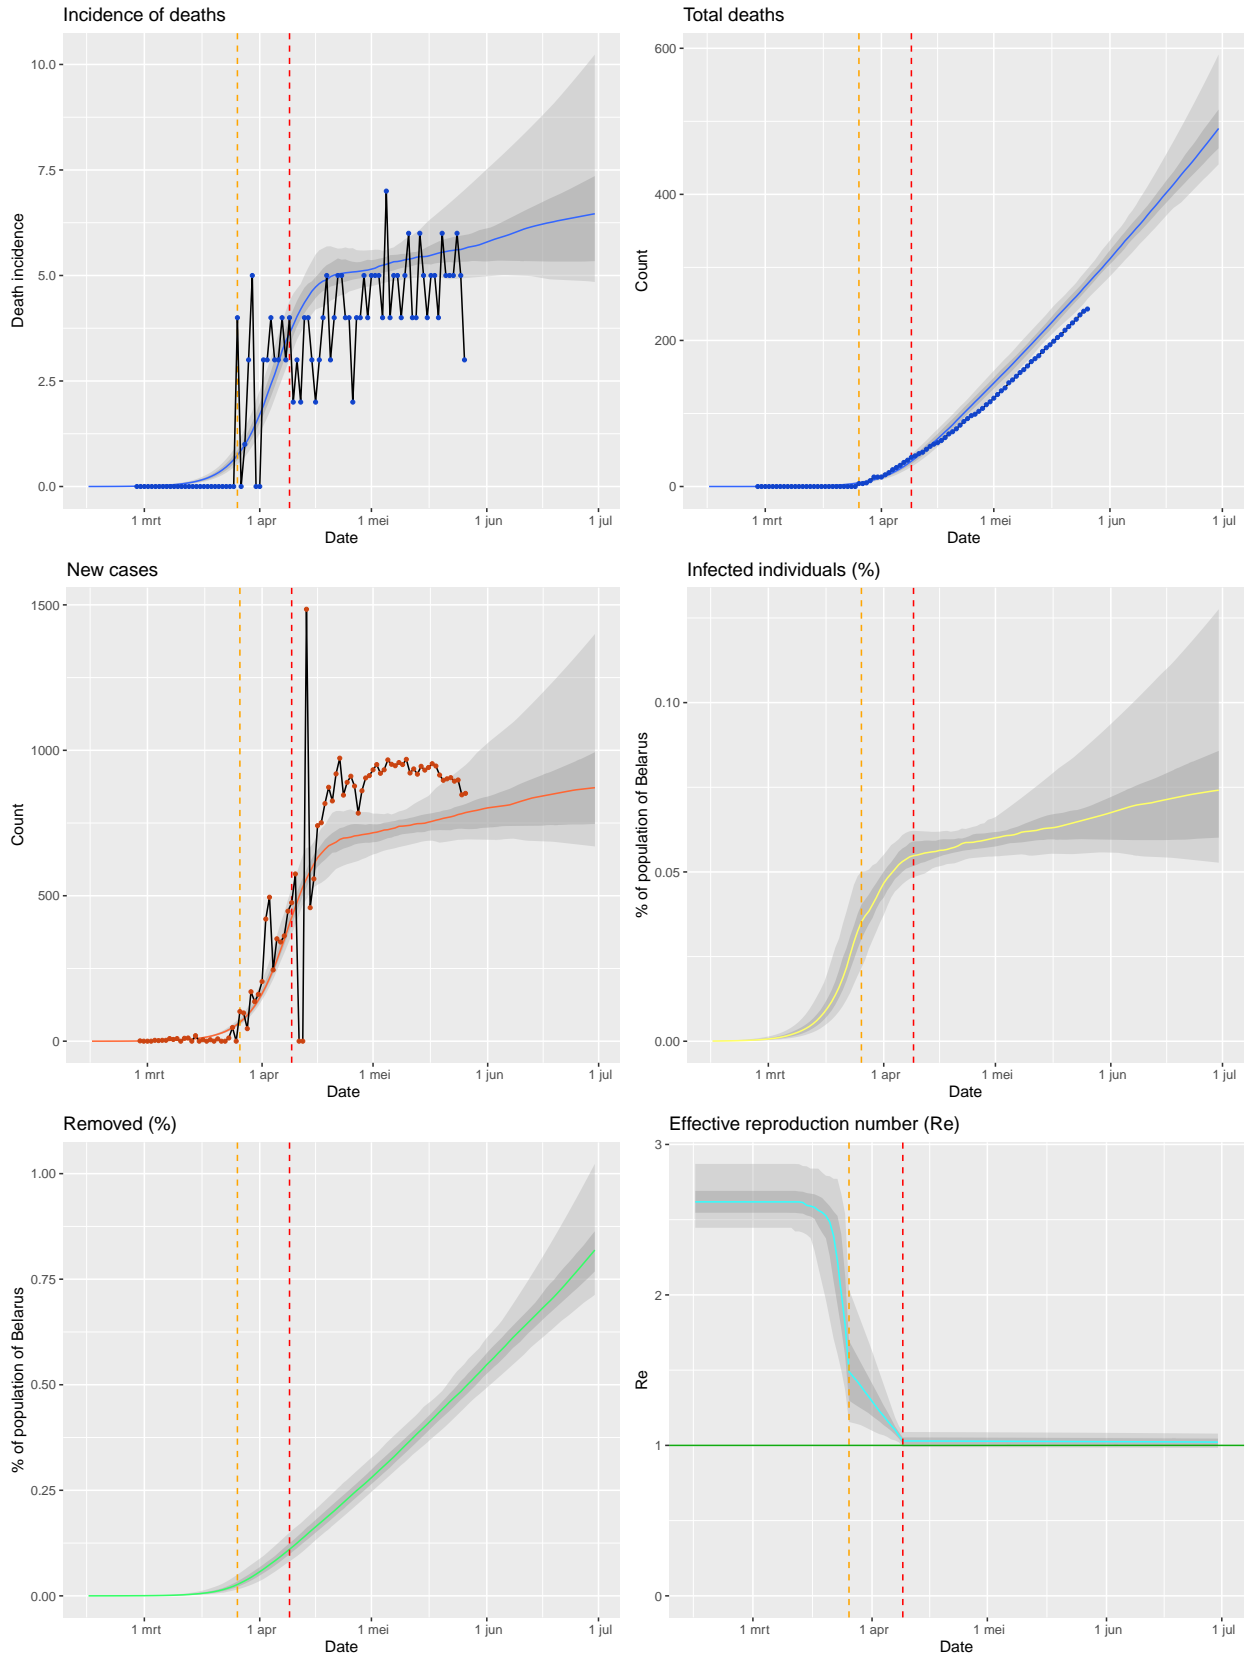

### 3 Belgium

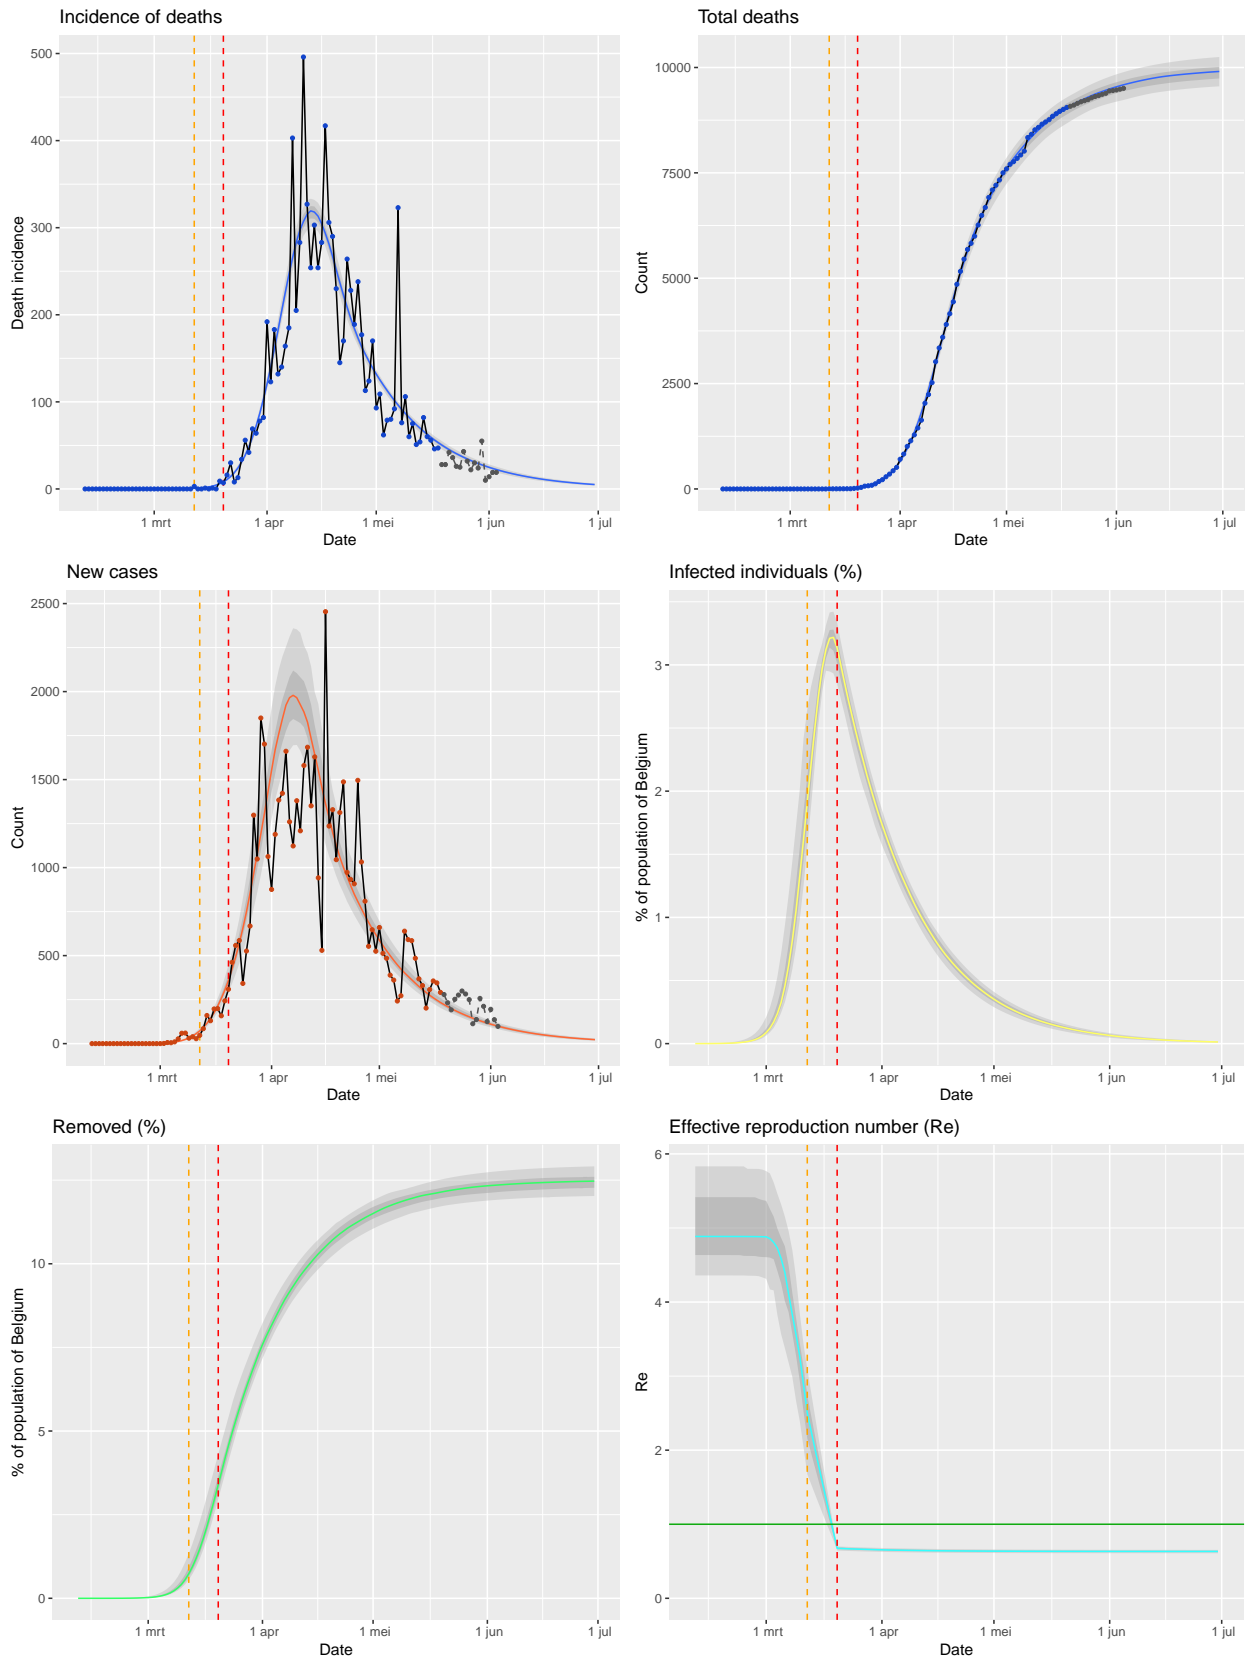

# 4 Bosnia and Herzegovina

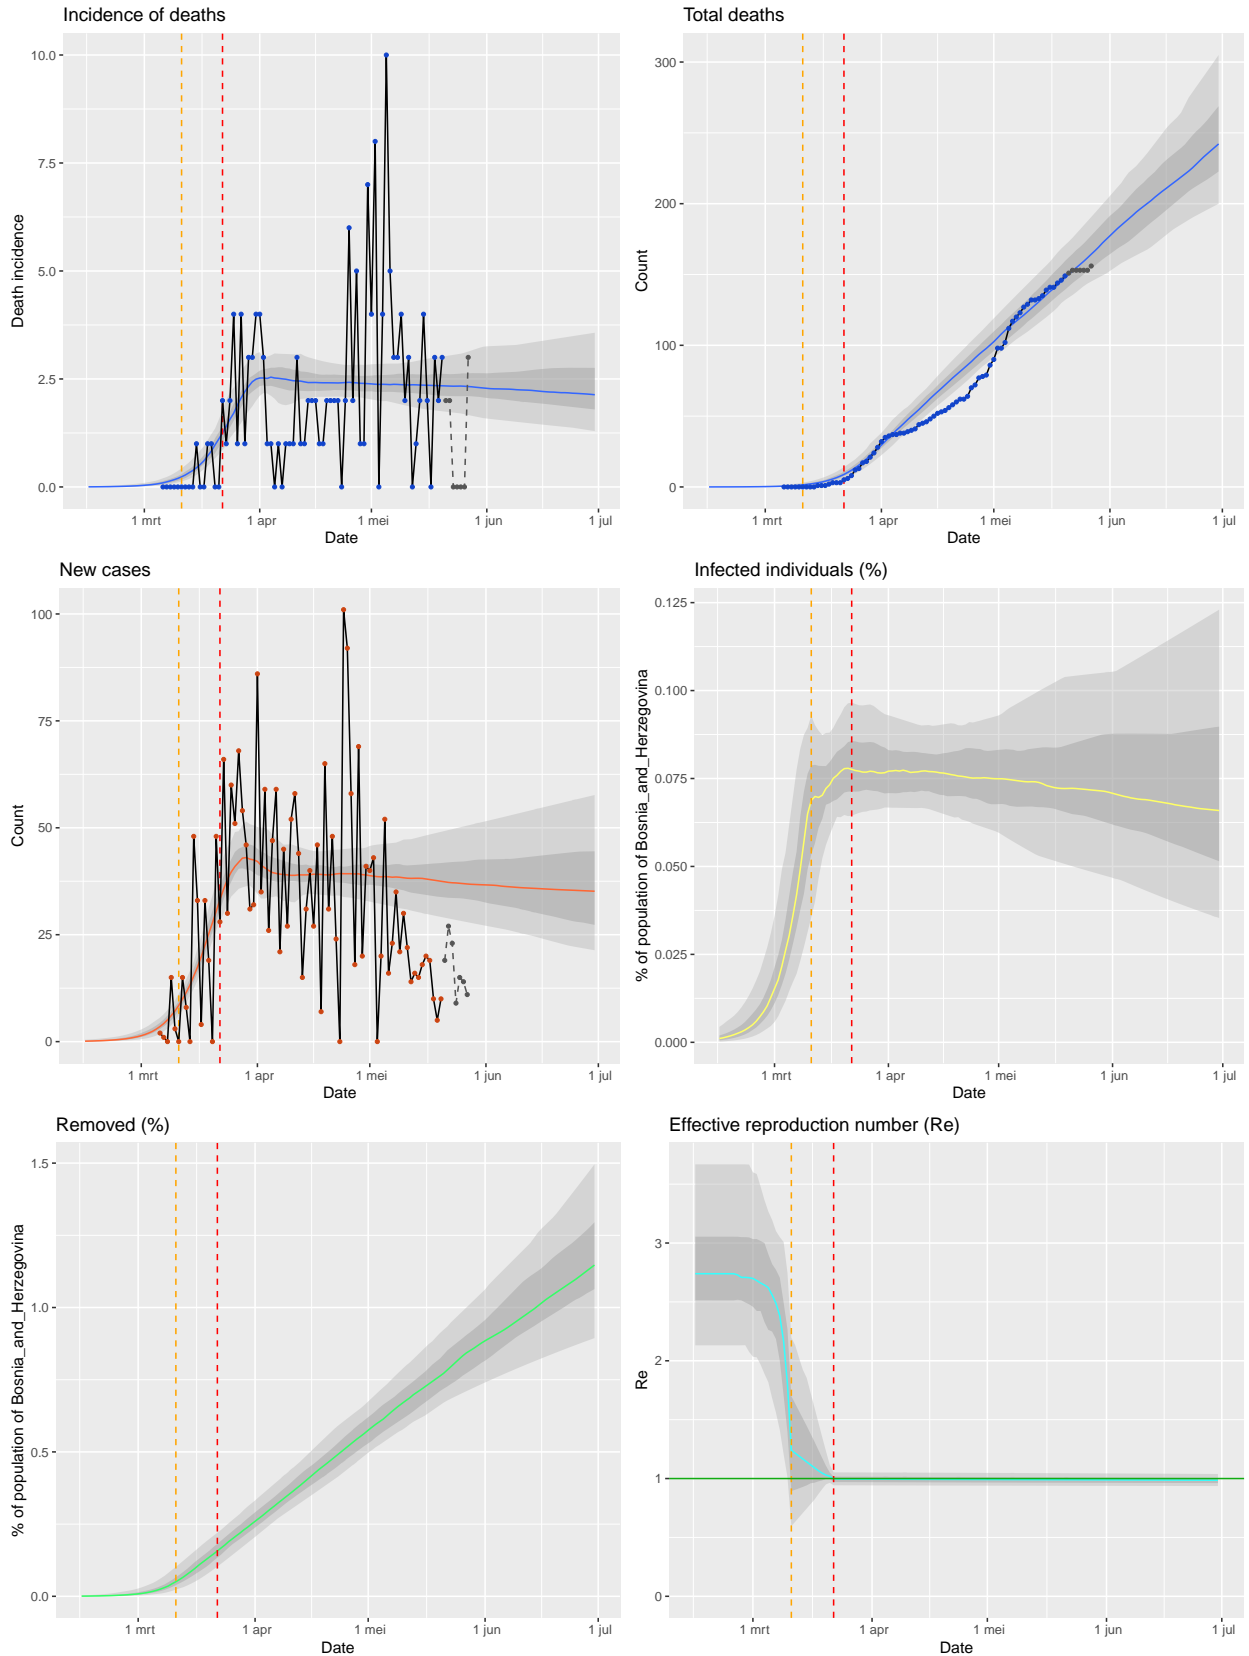

# 5 Canada

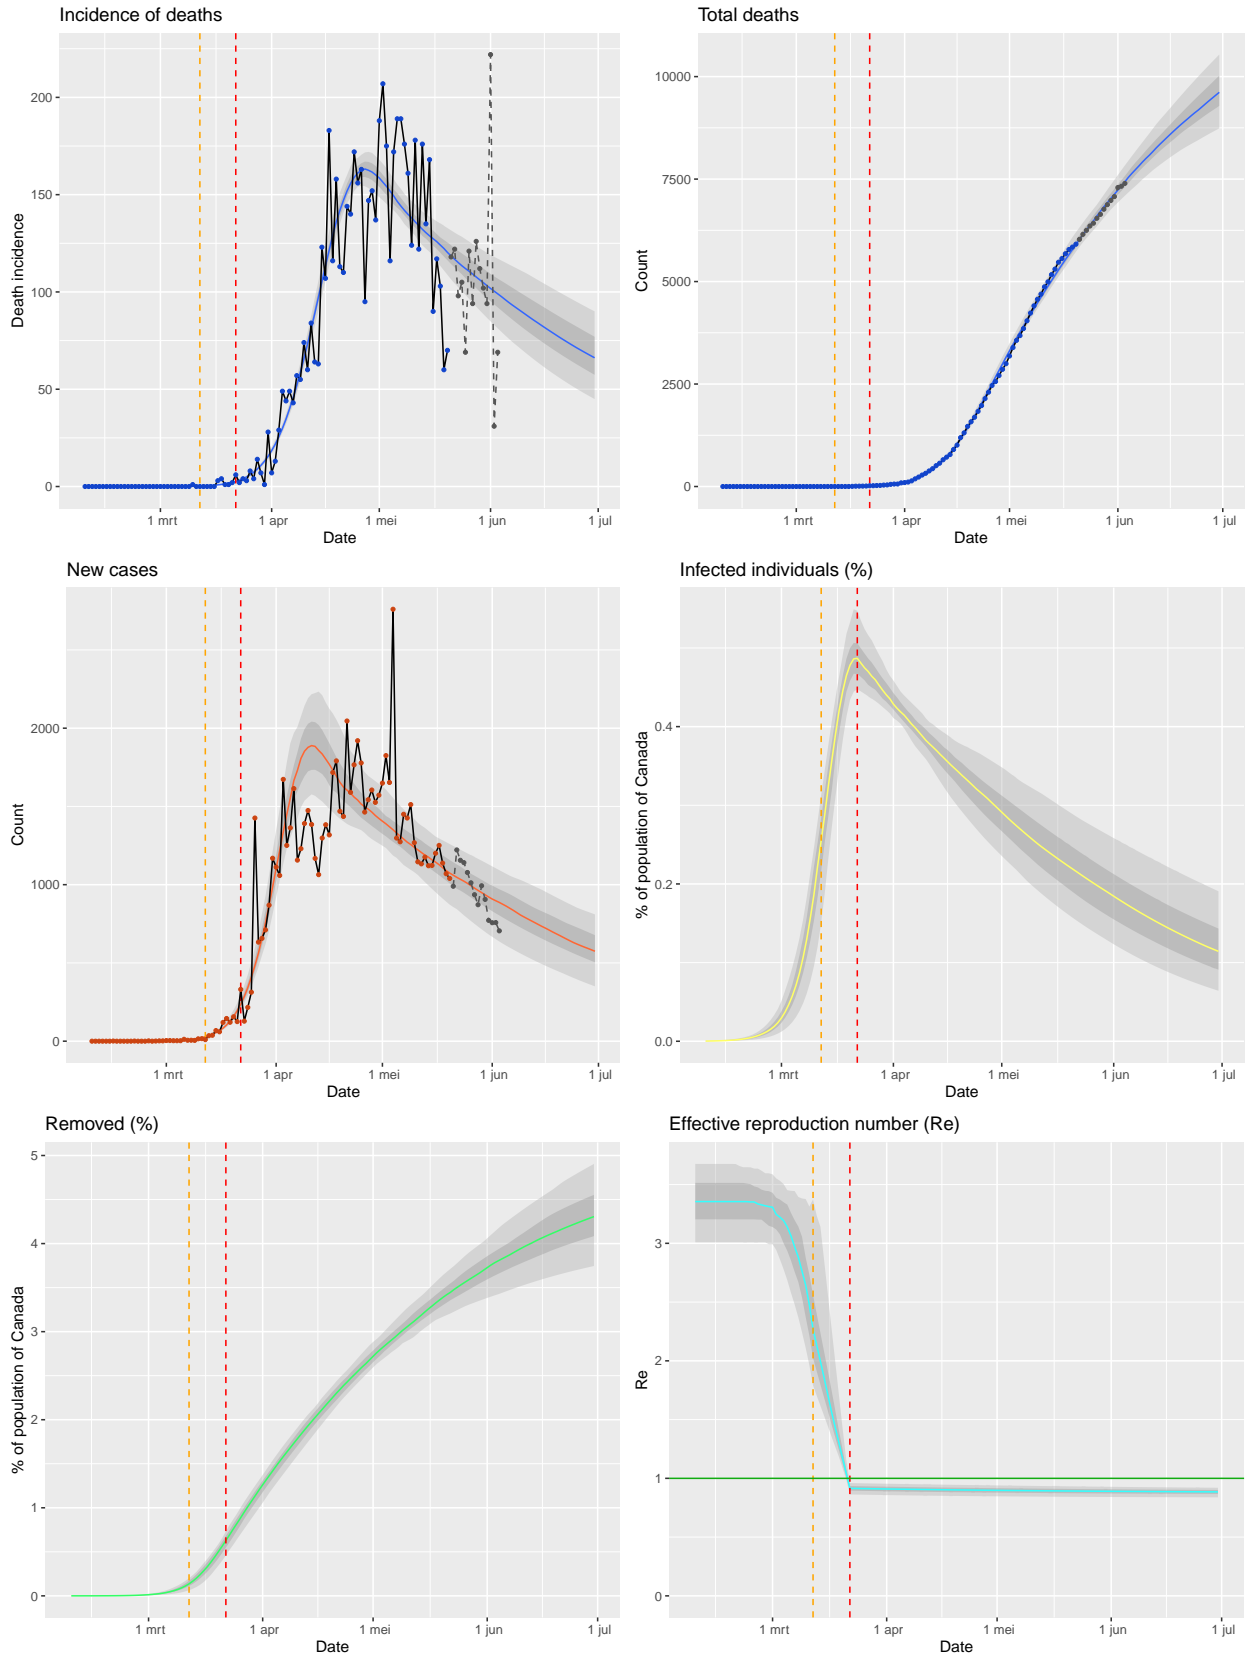

# 6 Croatia

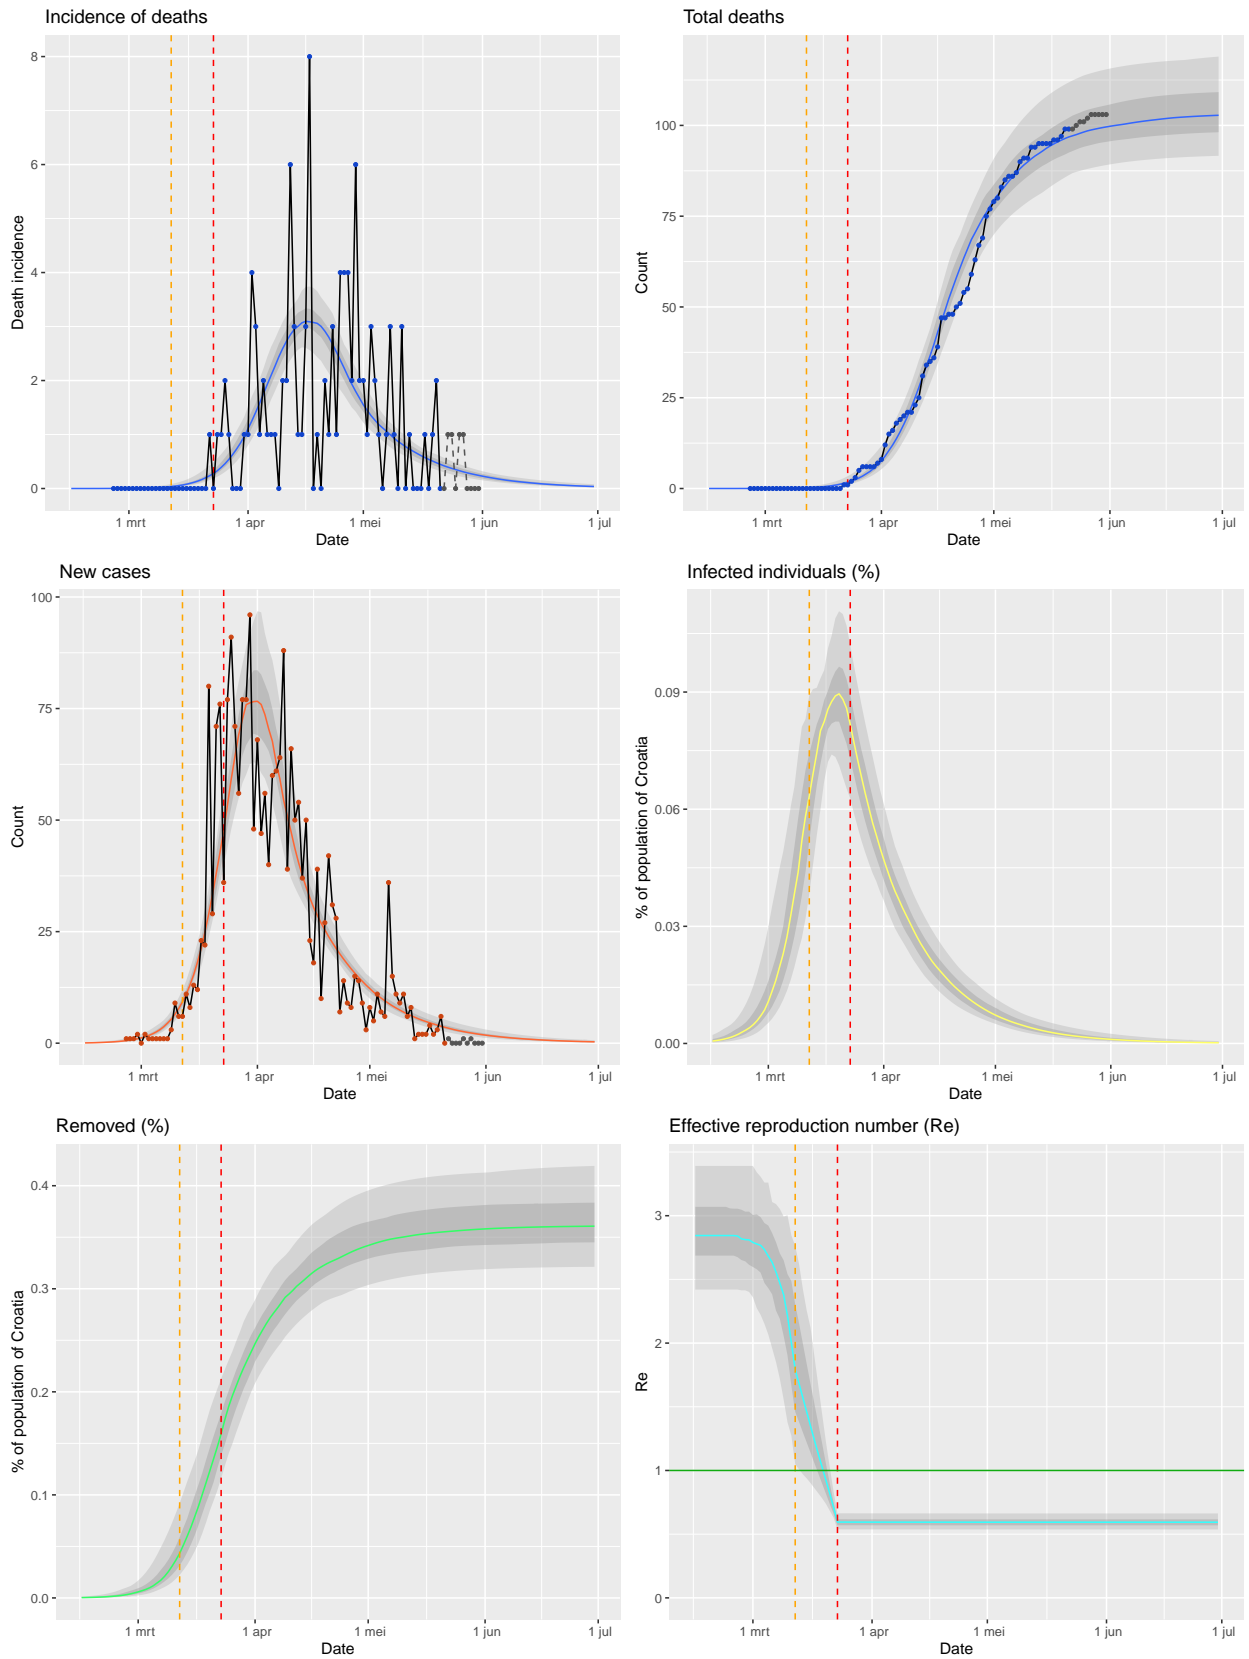

# 7 Czechia

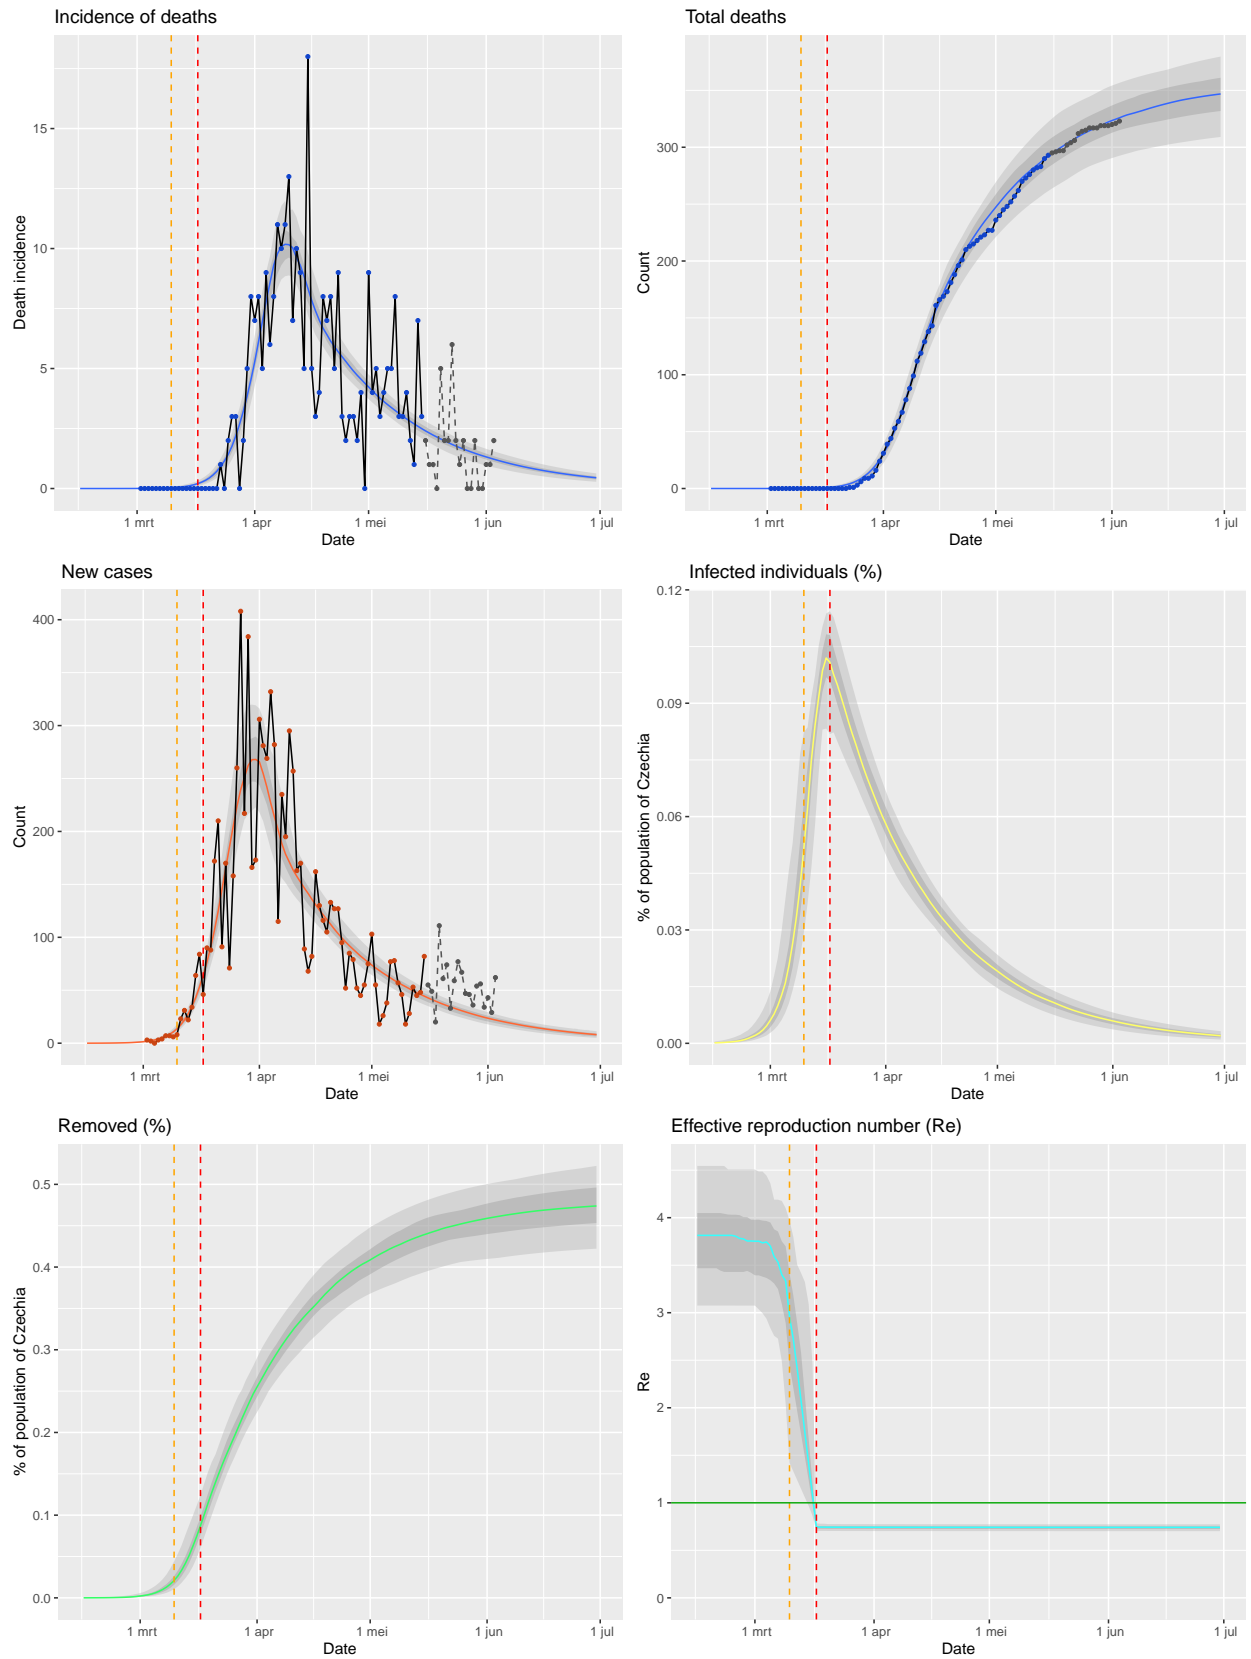



# 8 Denmark

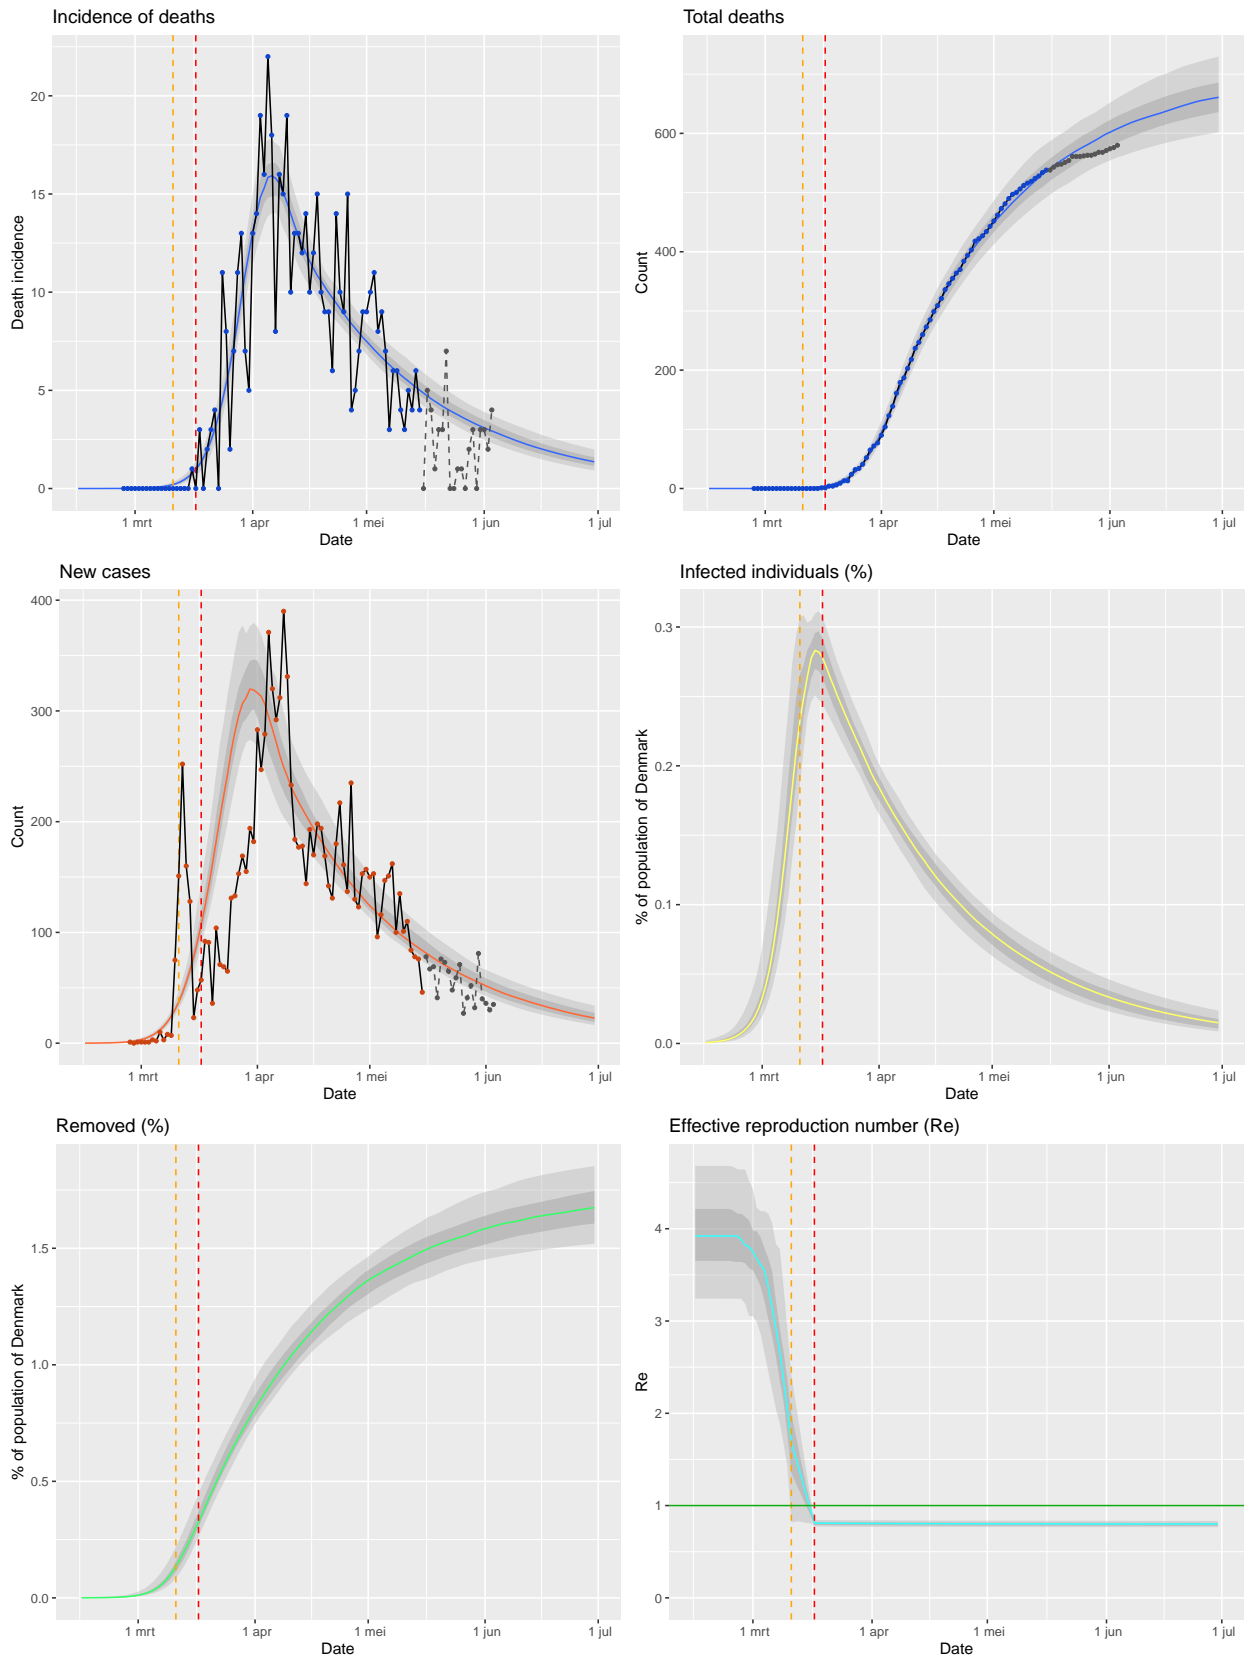

# 9 Estonia

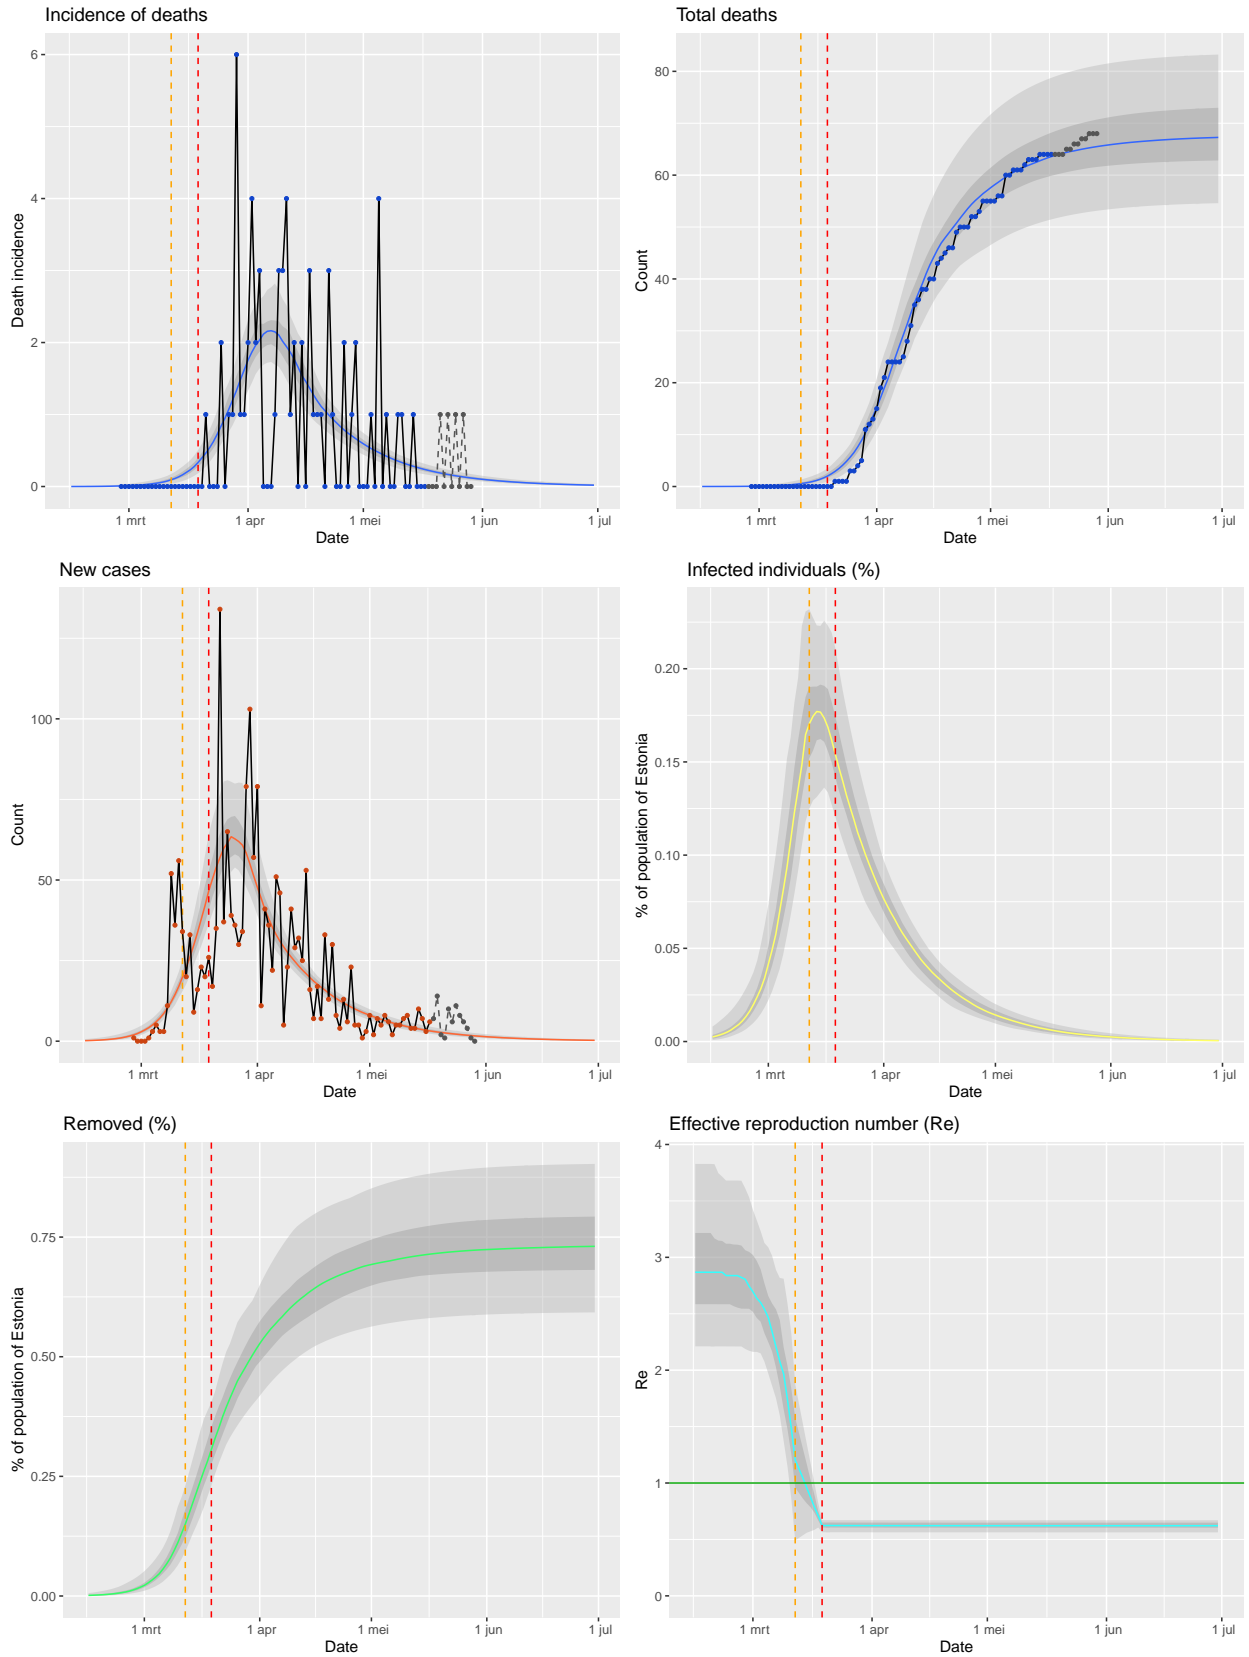

# 10 Finland

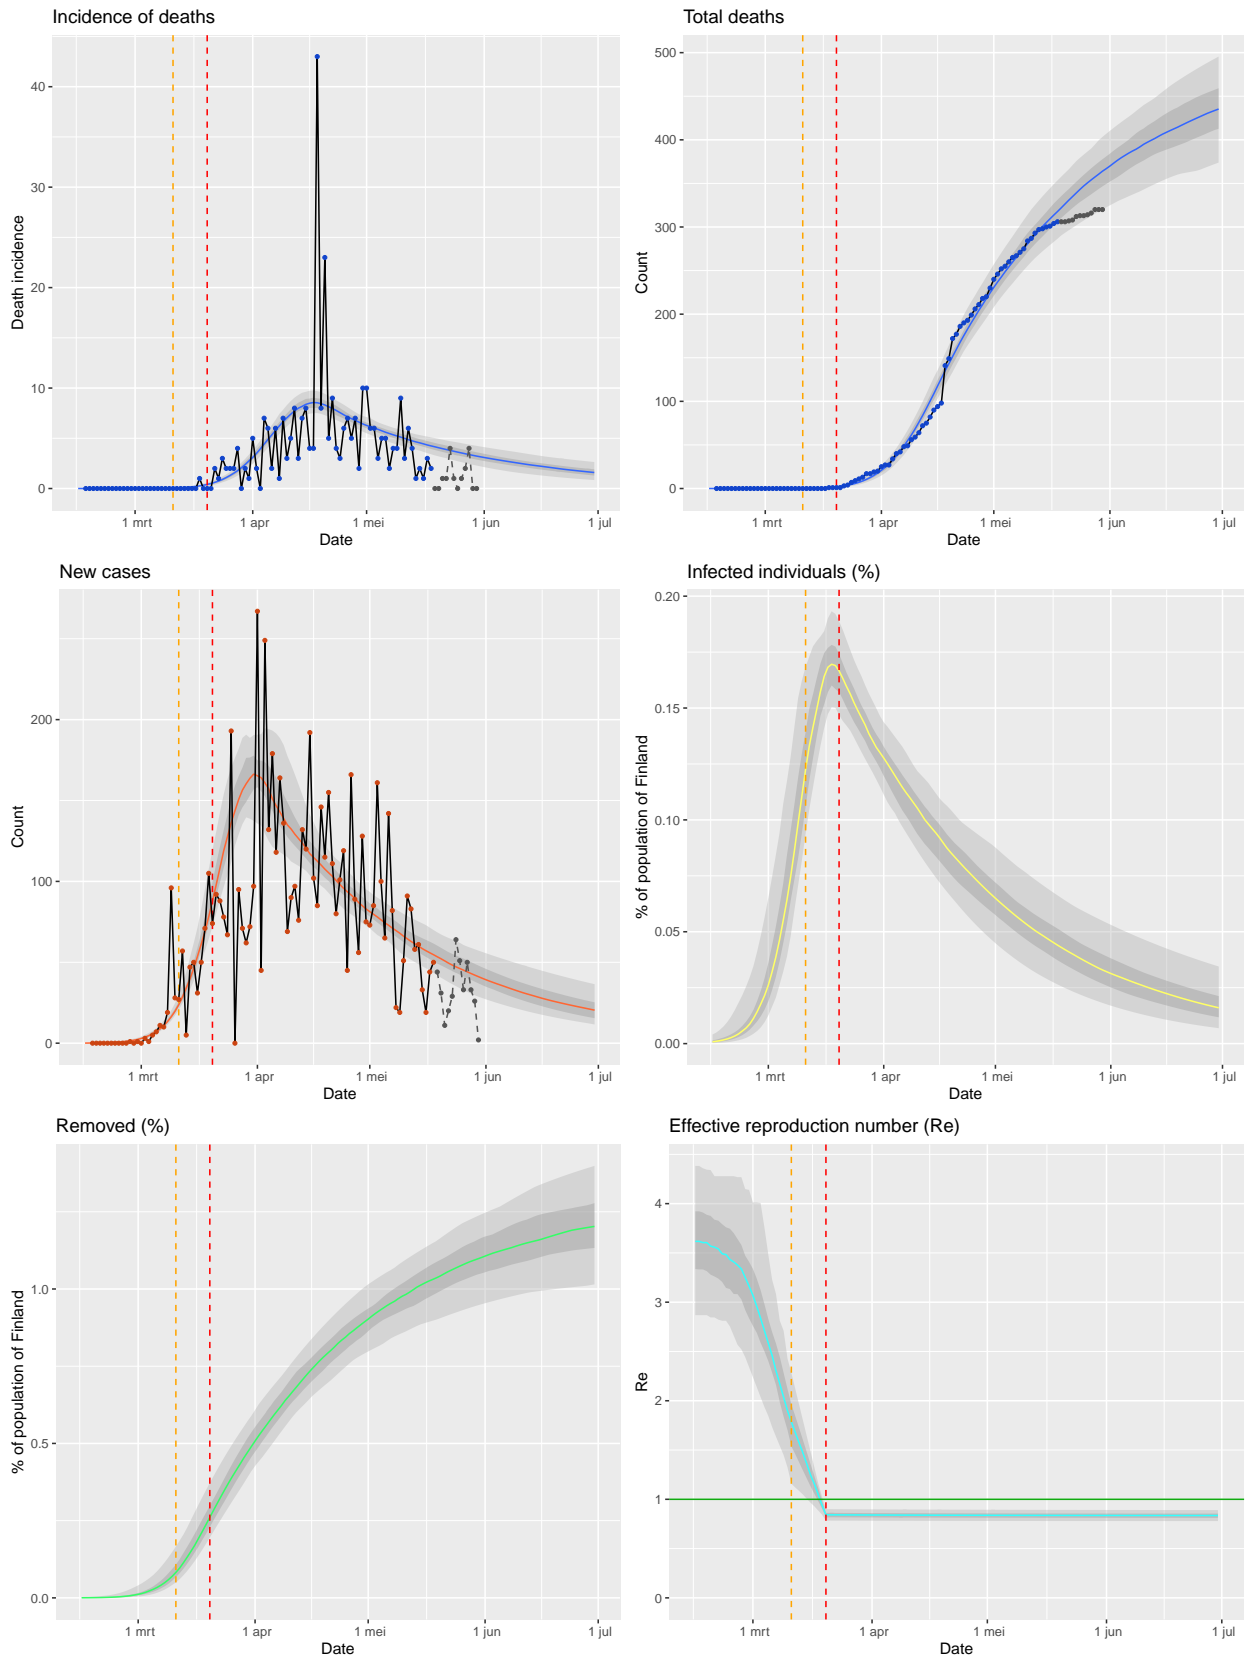

# 11 France

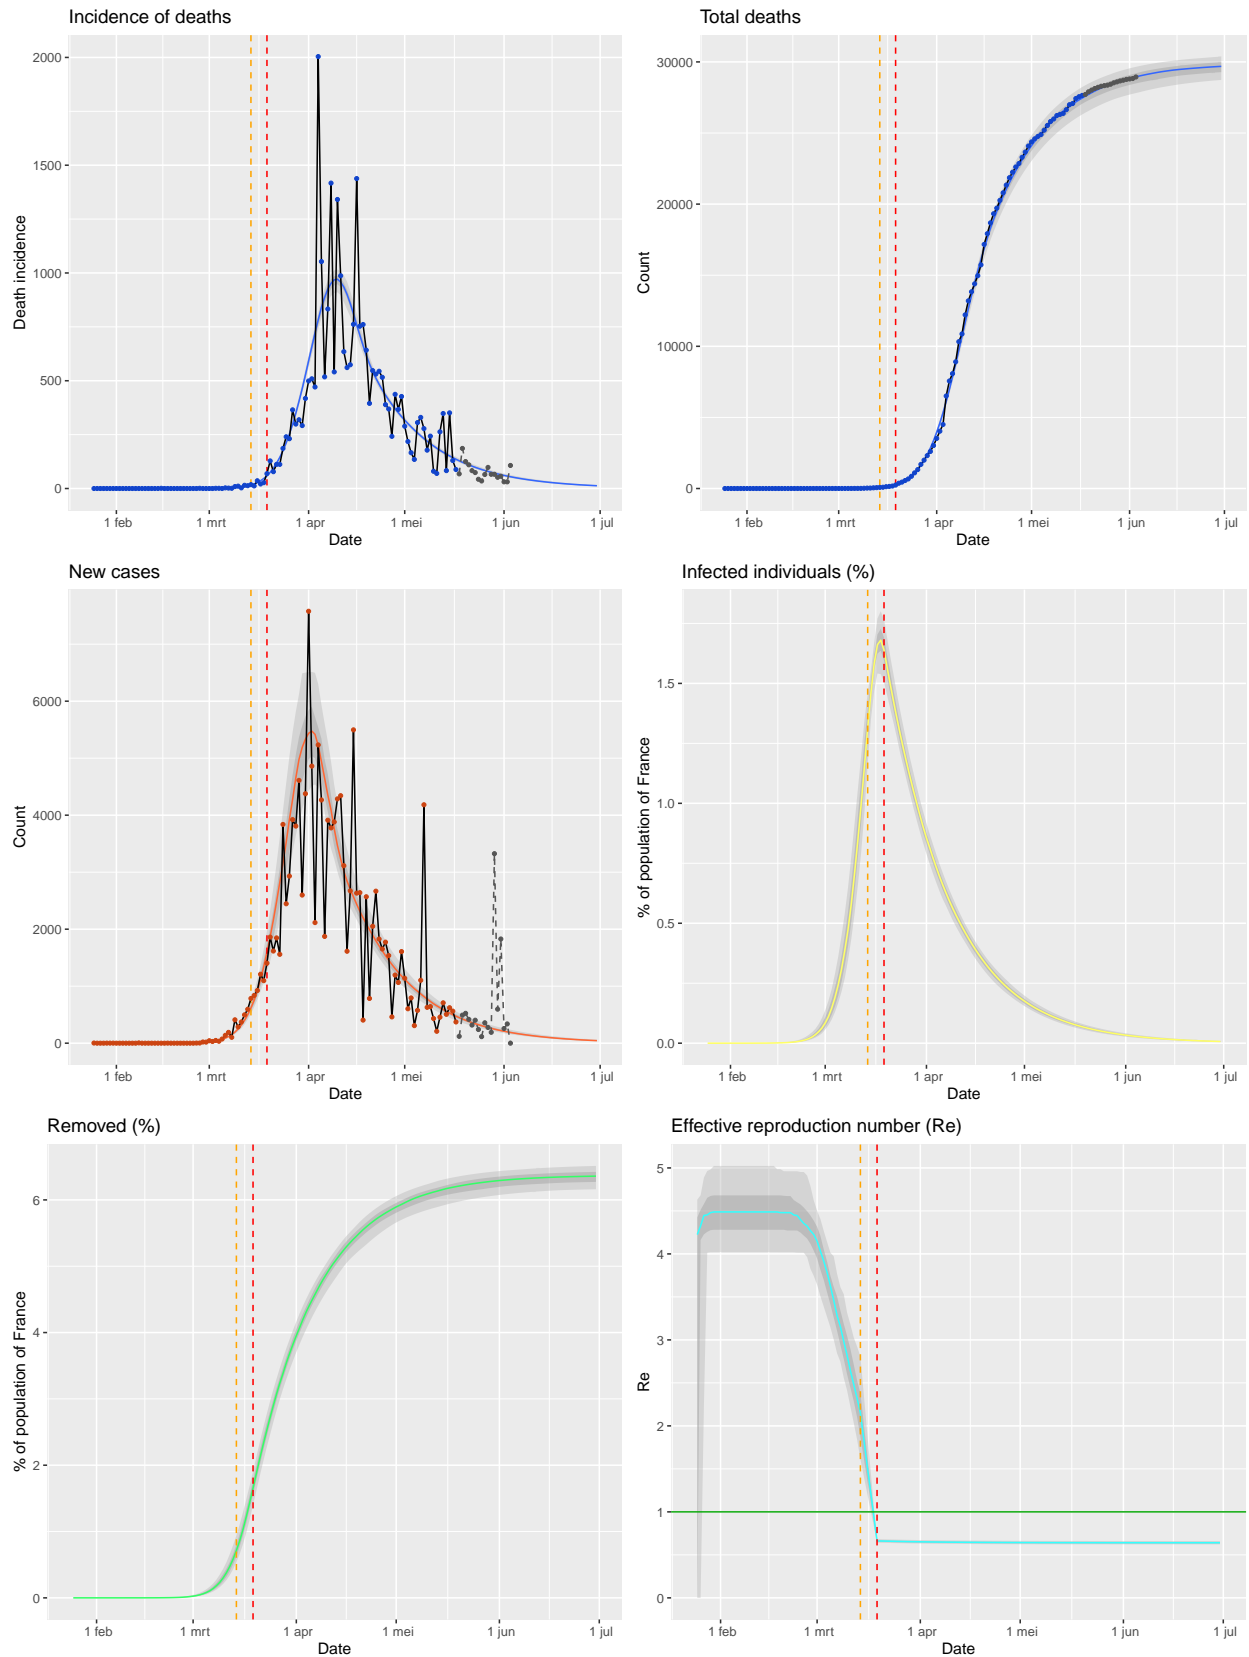

# 12 Germany

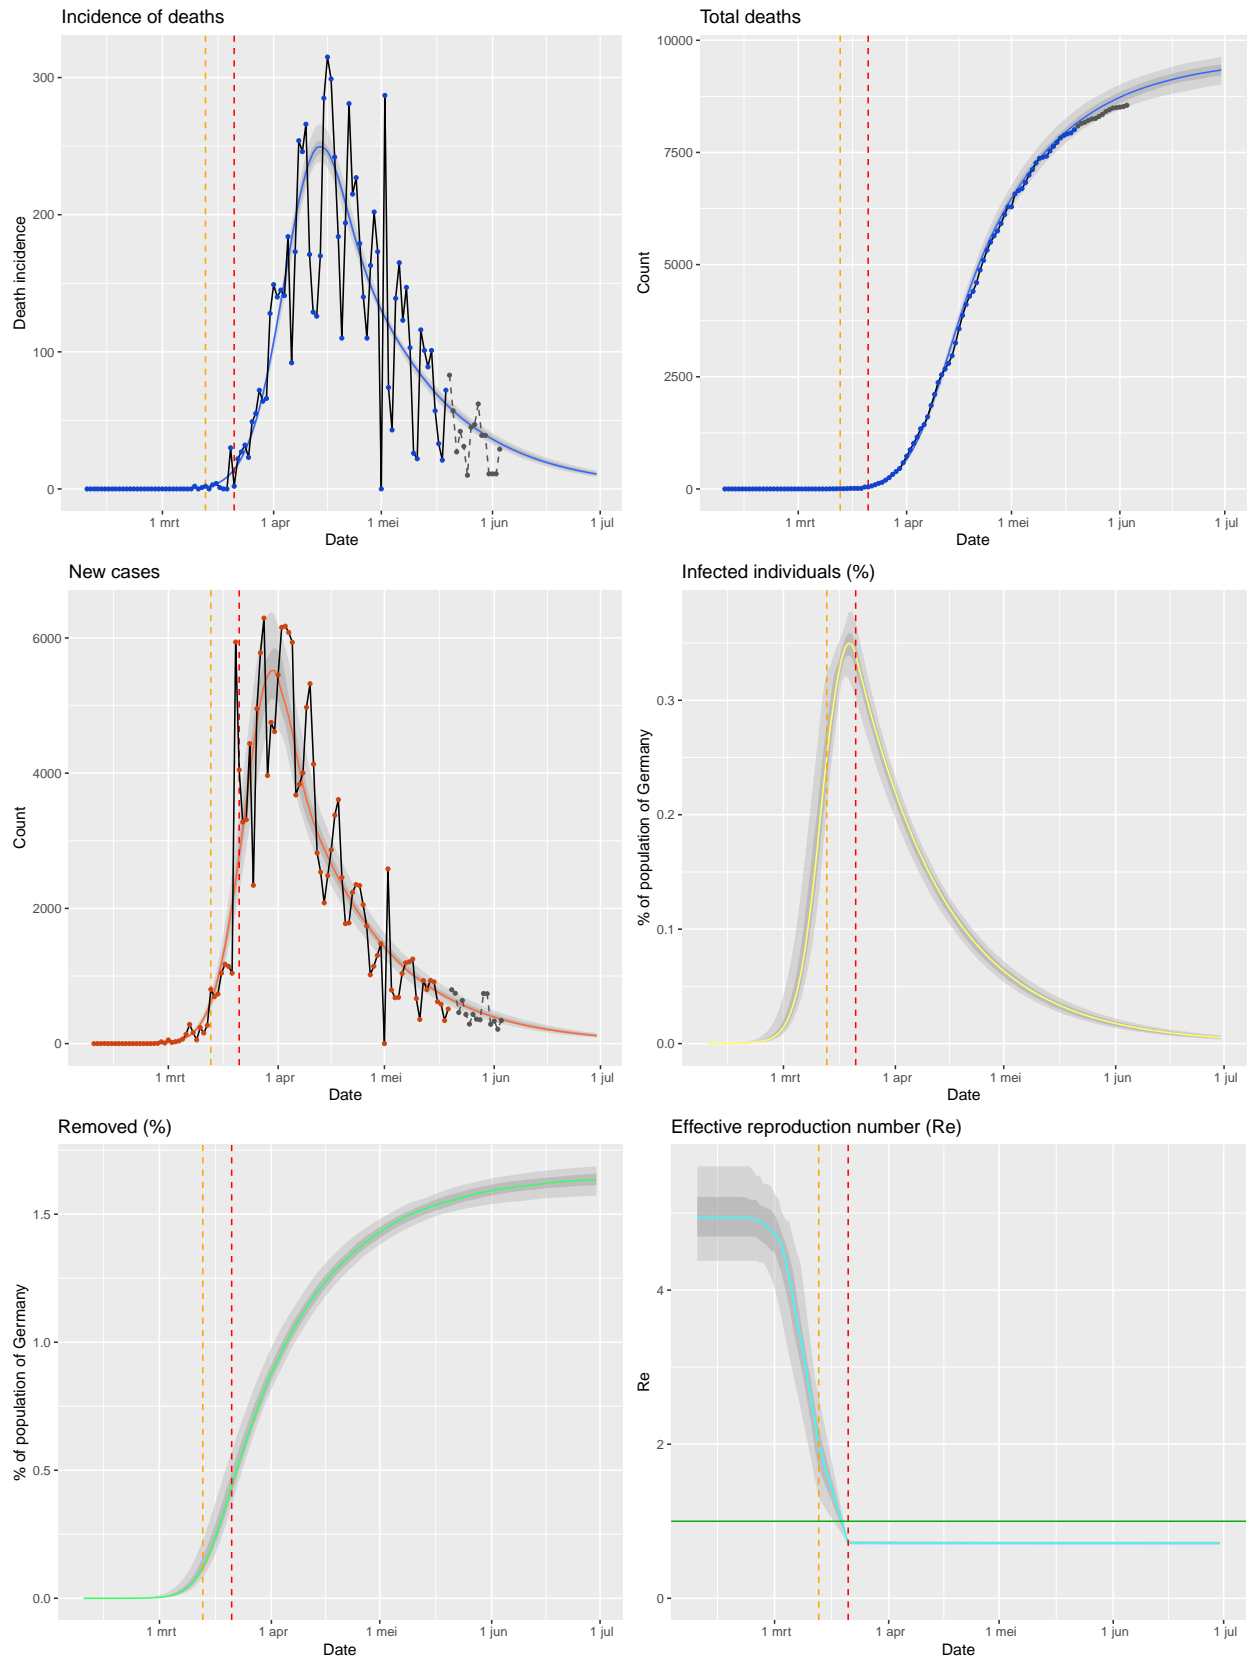

# 13 Greece

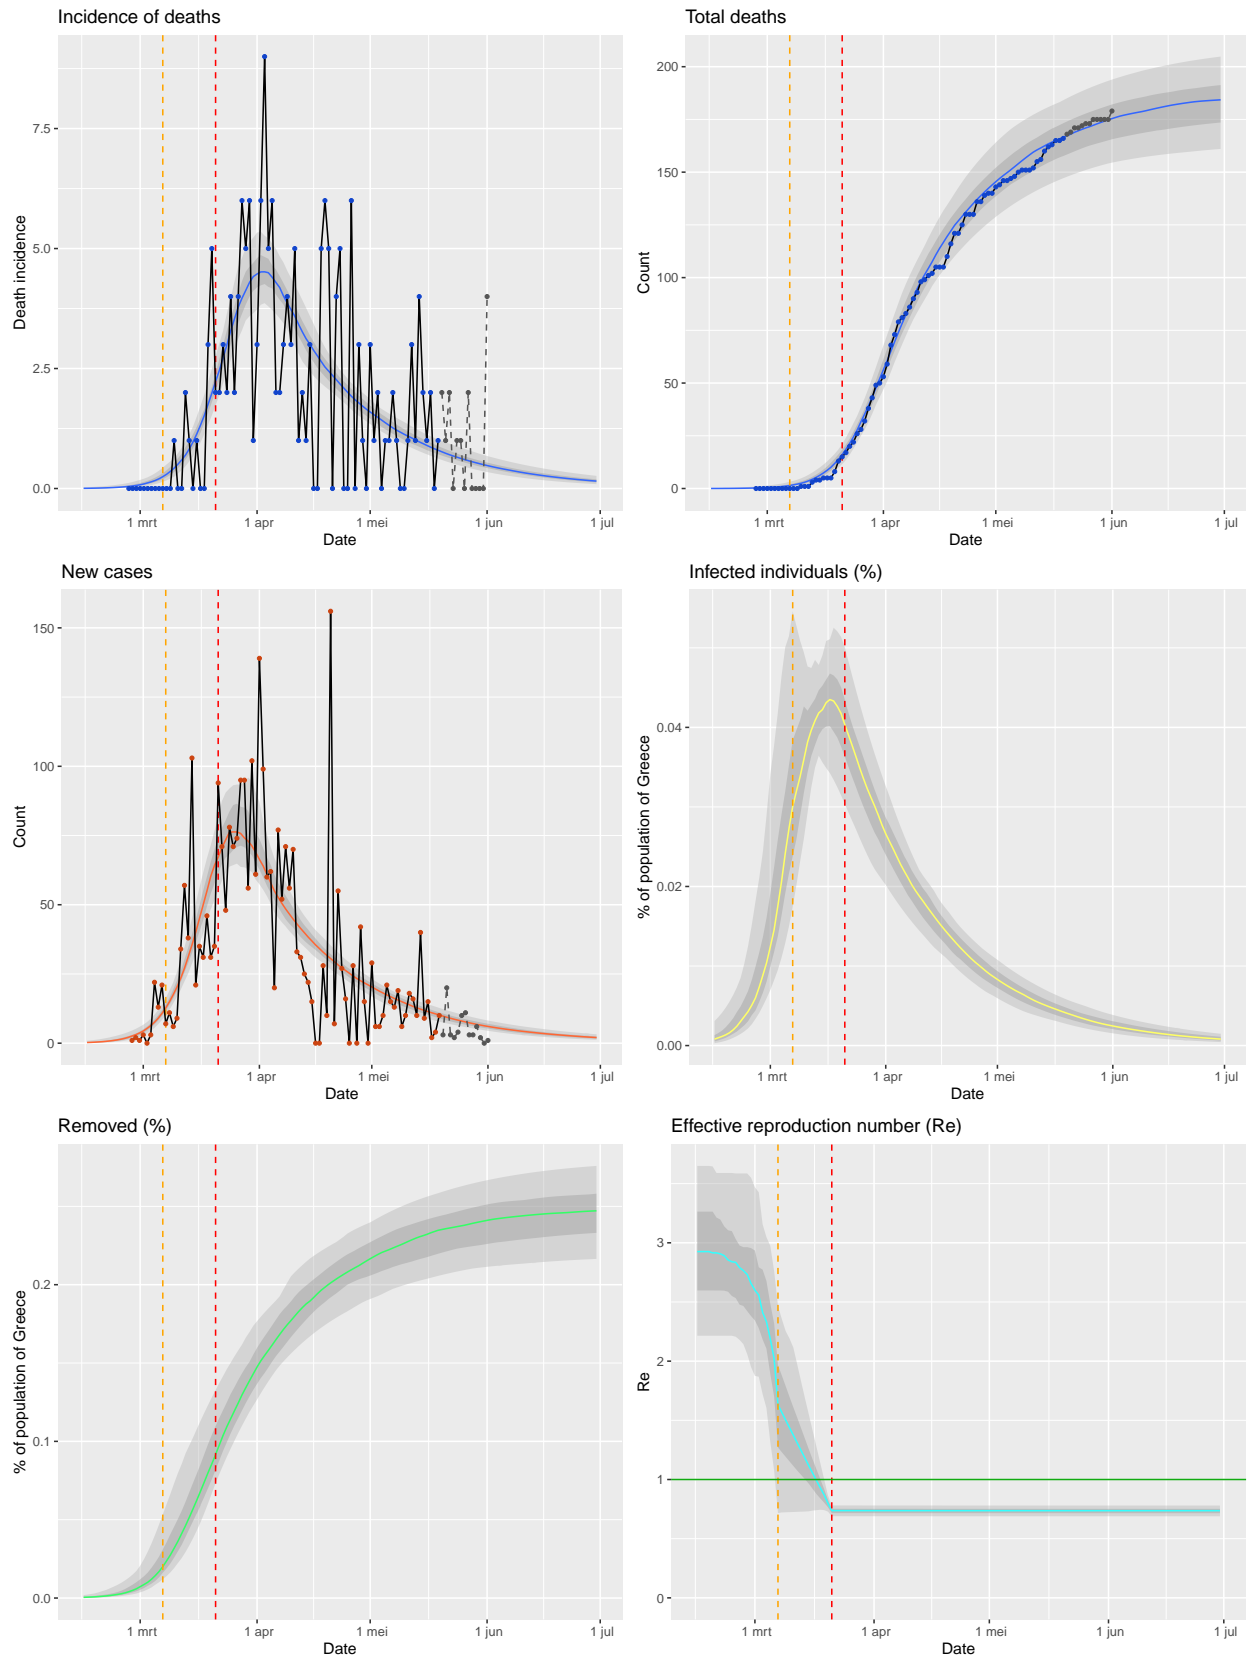

# 14 Hungary

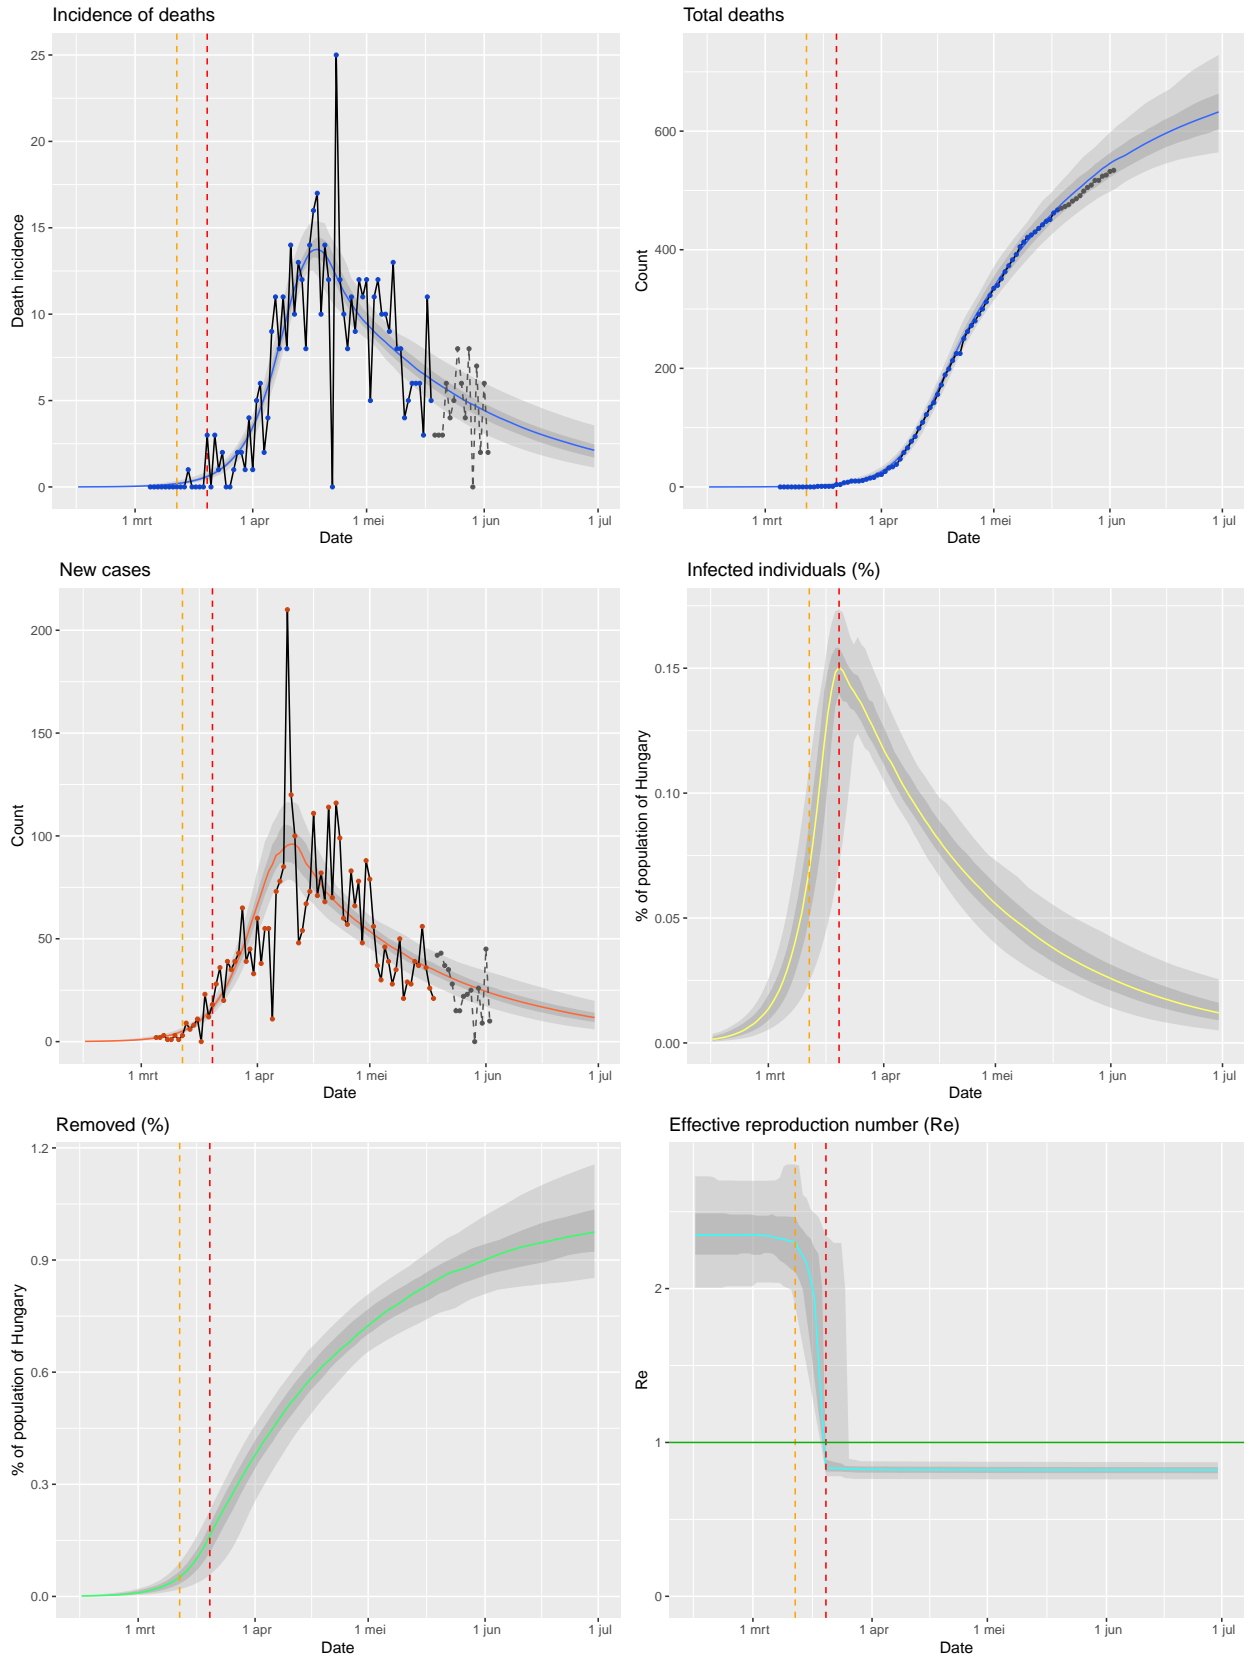

# 15 Ireland

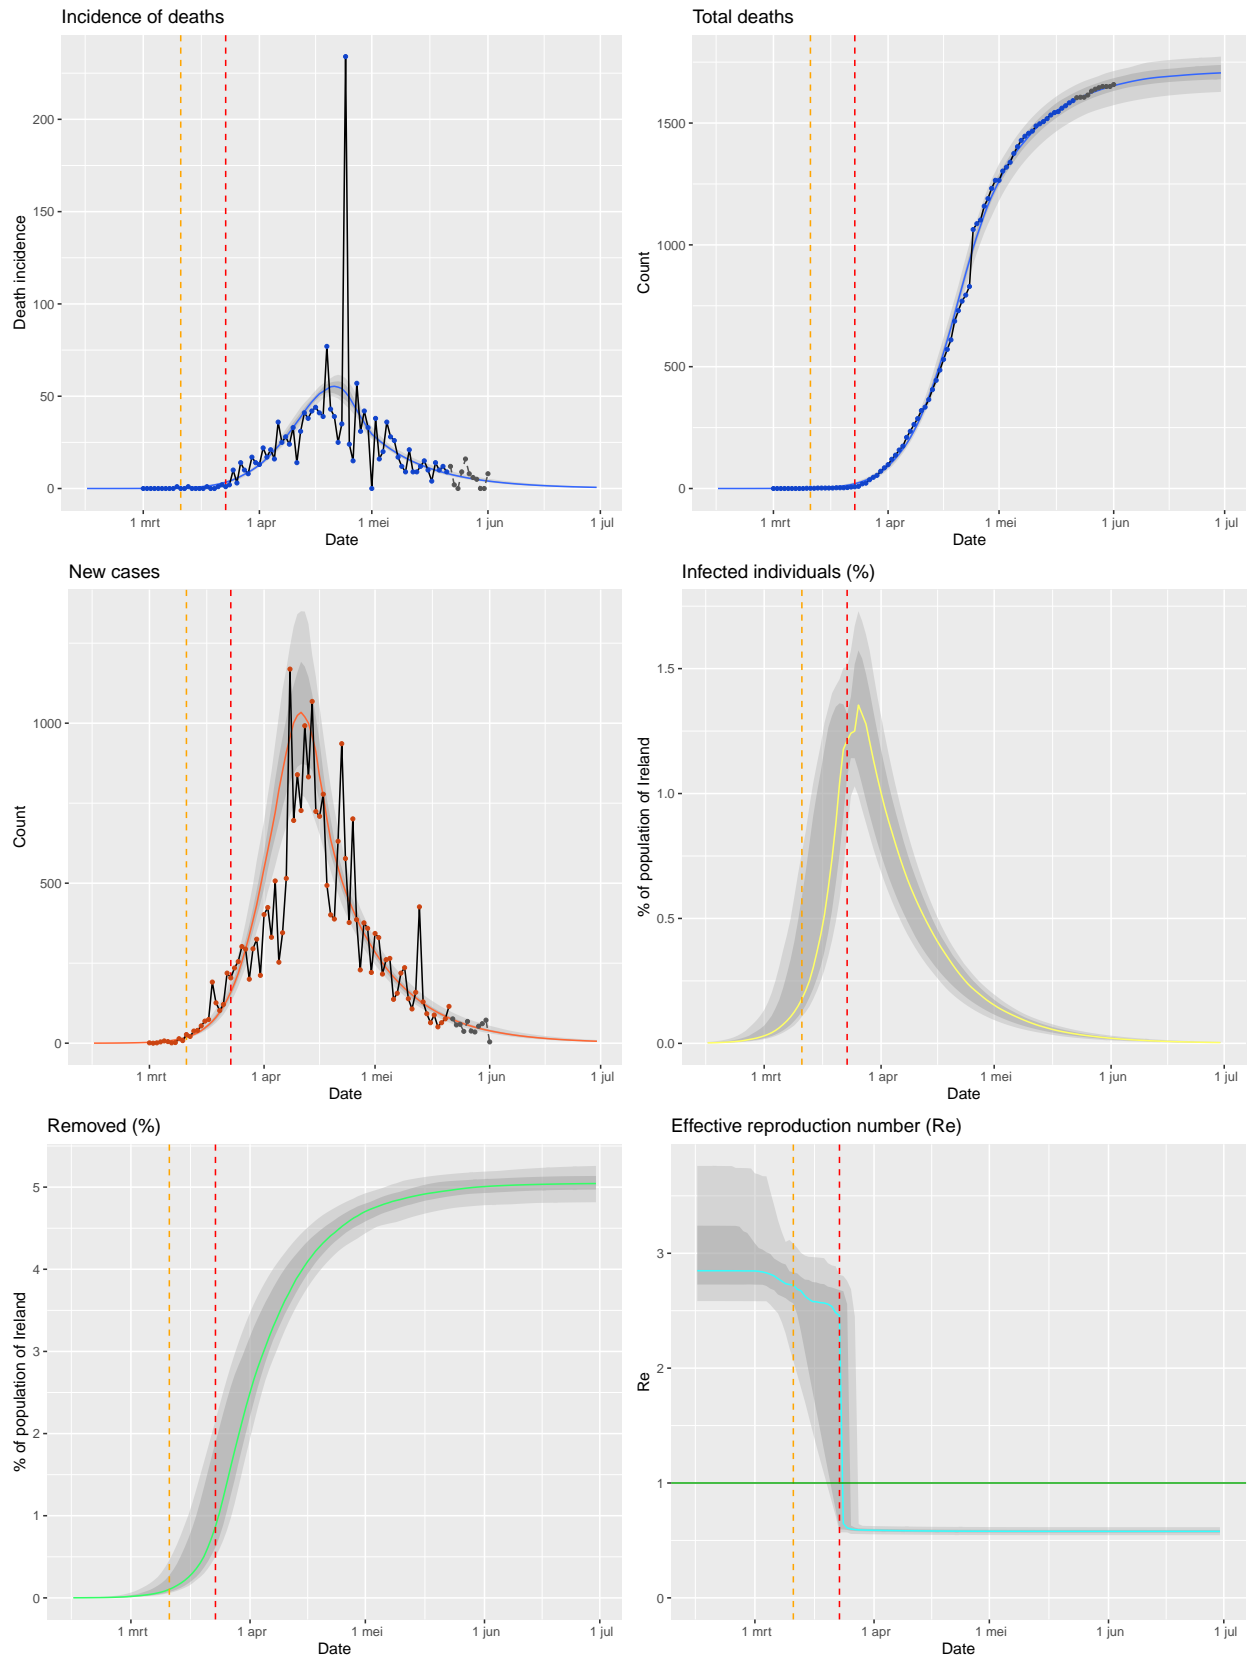



# 16 Israel

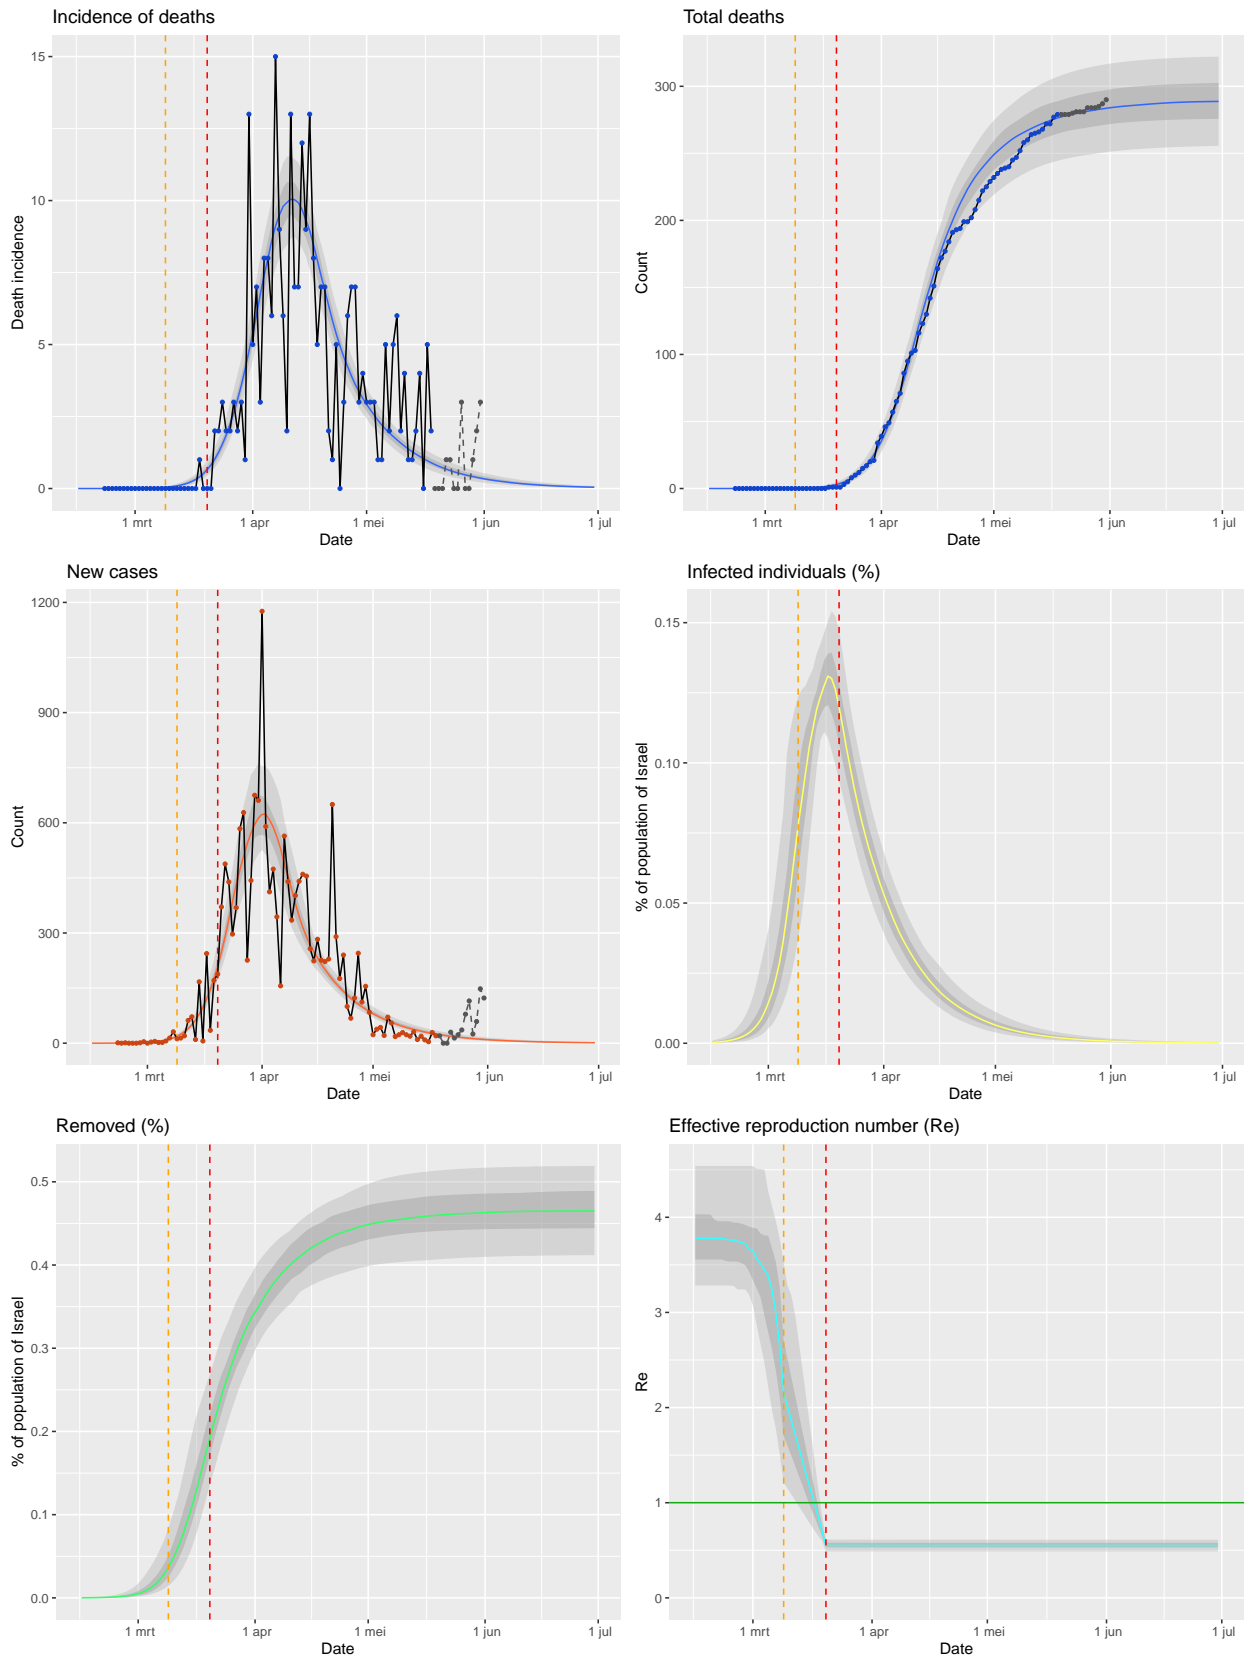

# 17 Italy

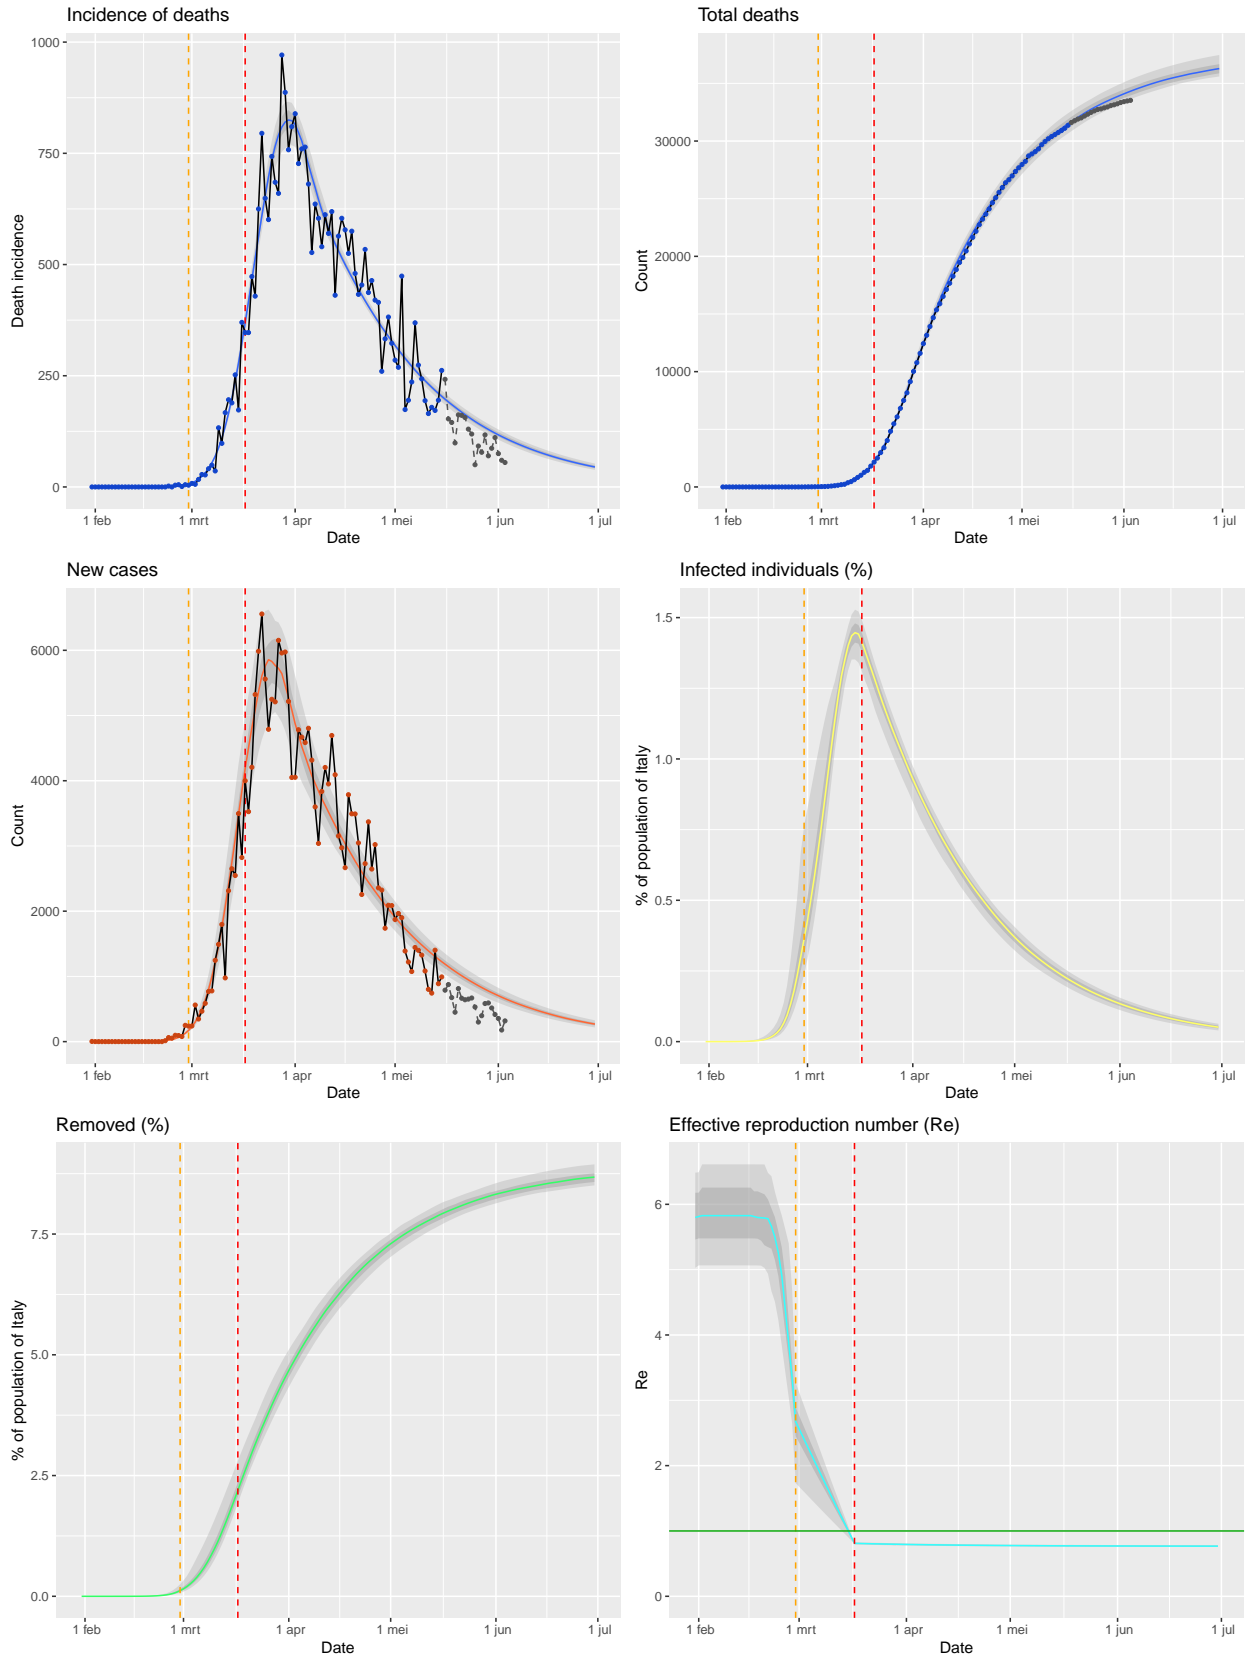

# 18 Latvia

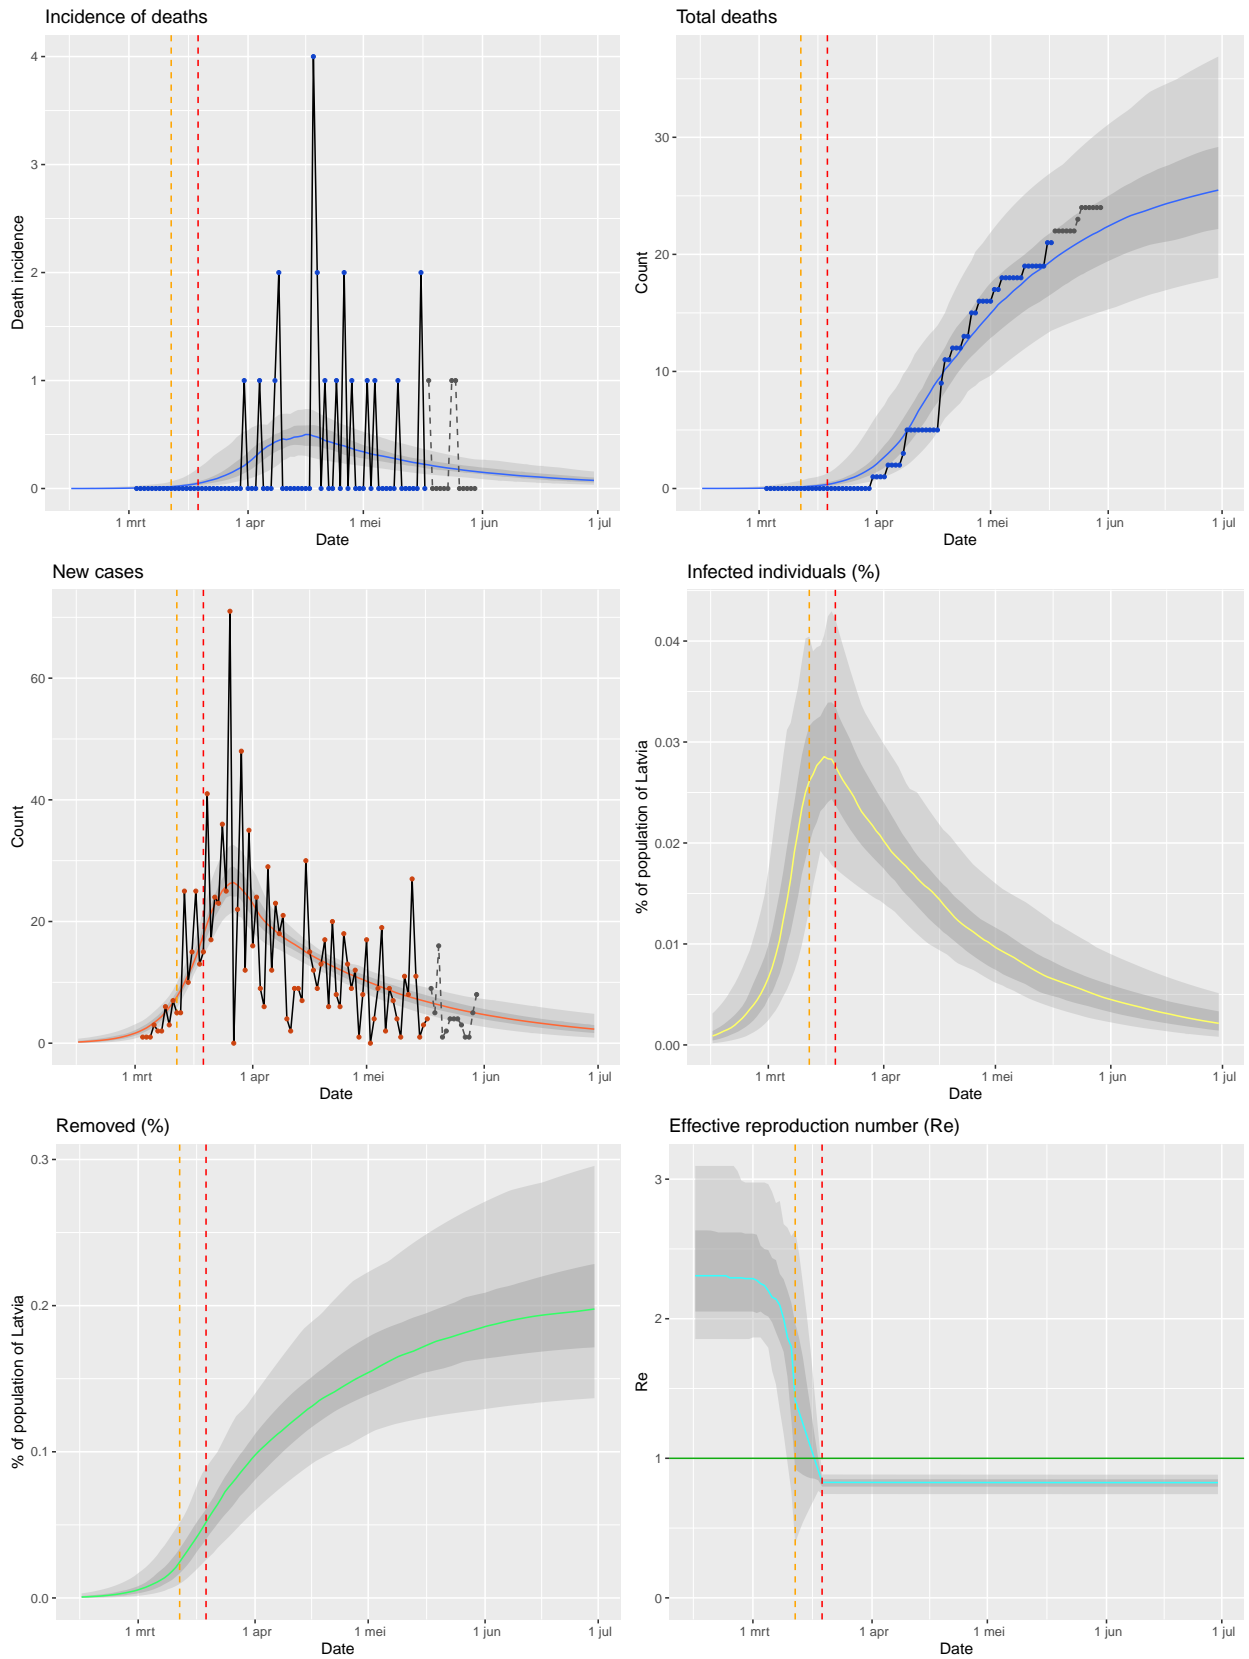

# 19 Lithuania

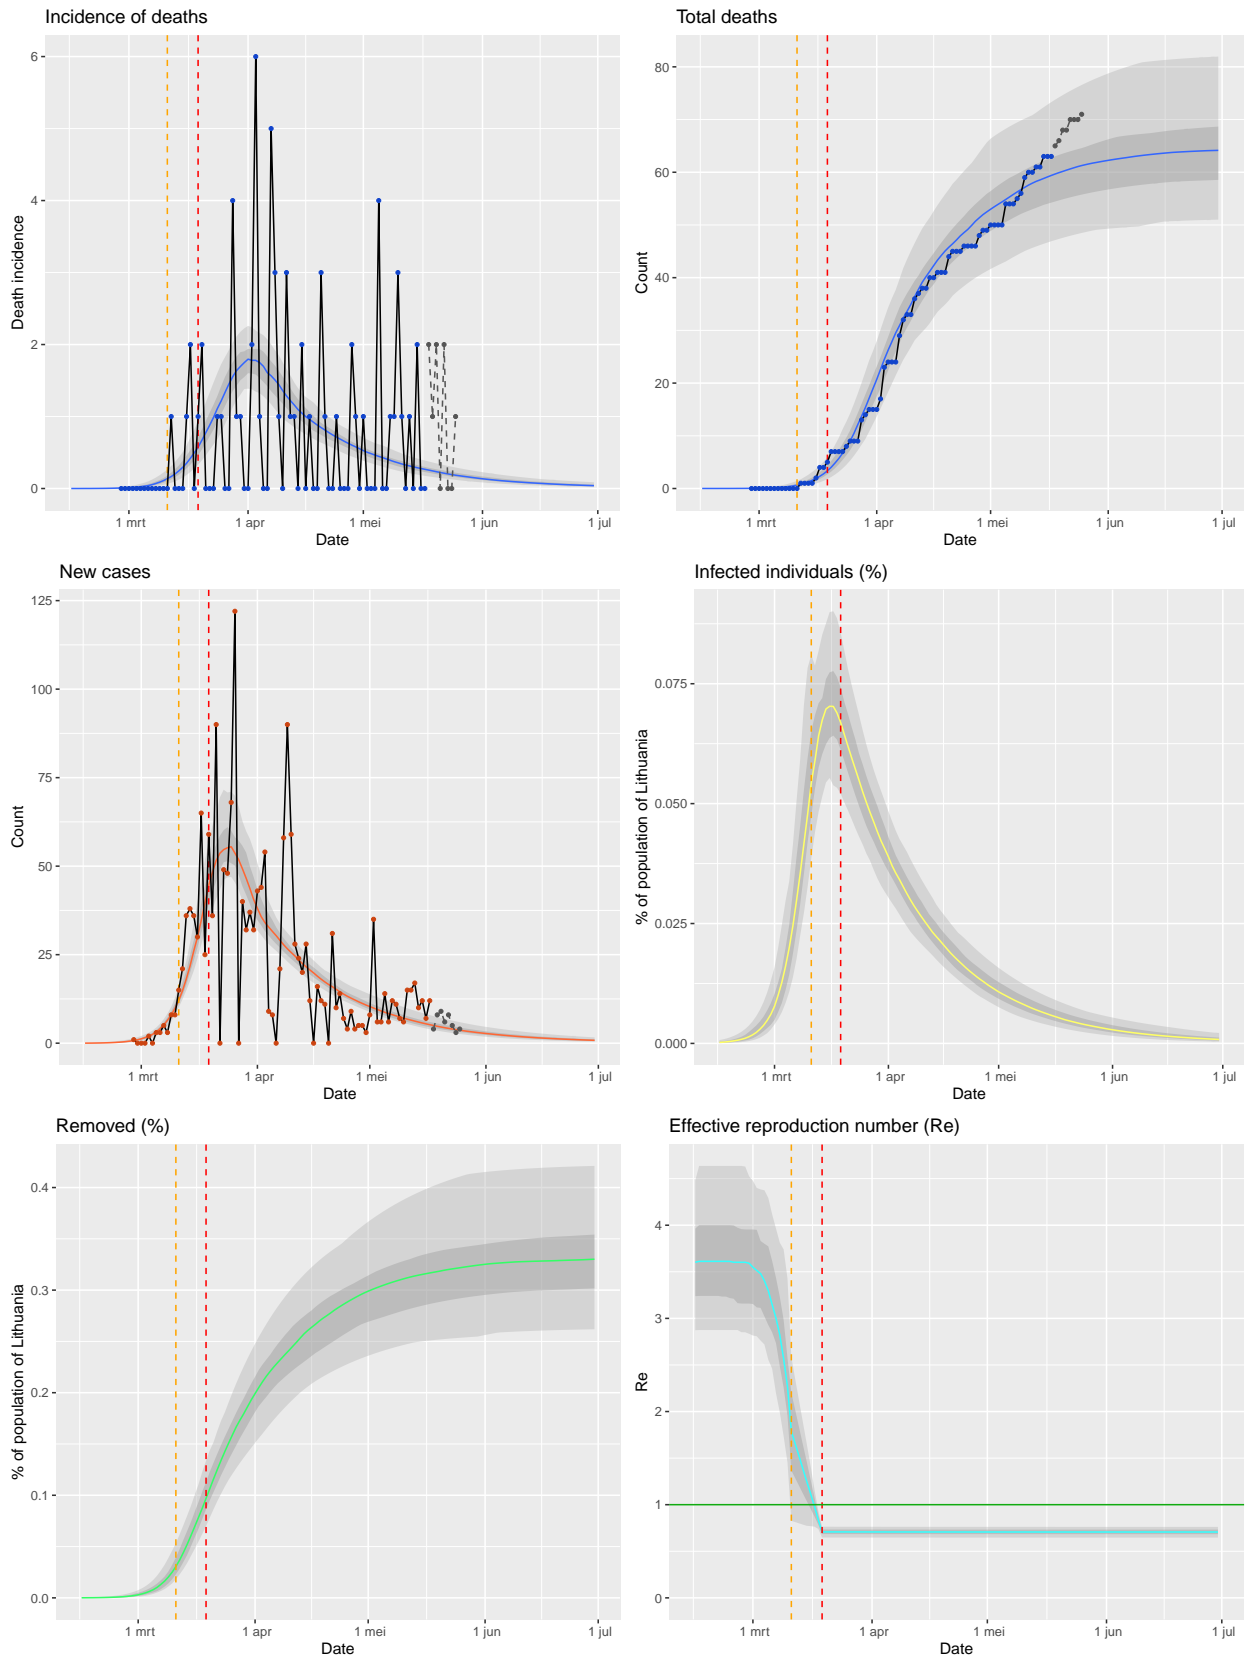

# 20 Luxembourg

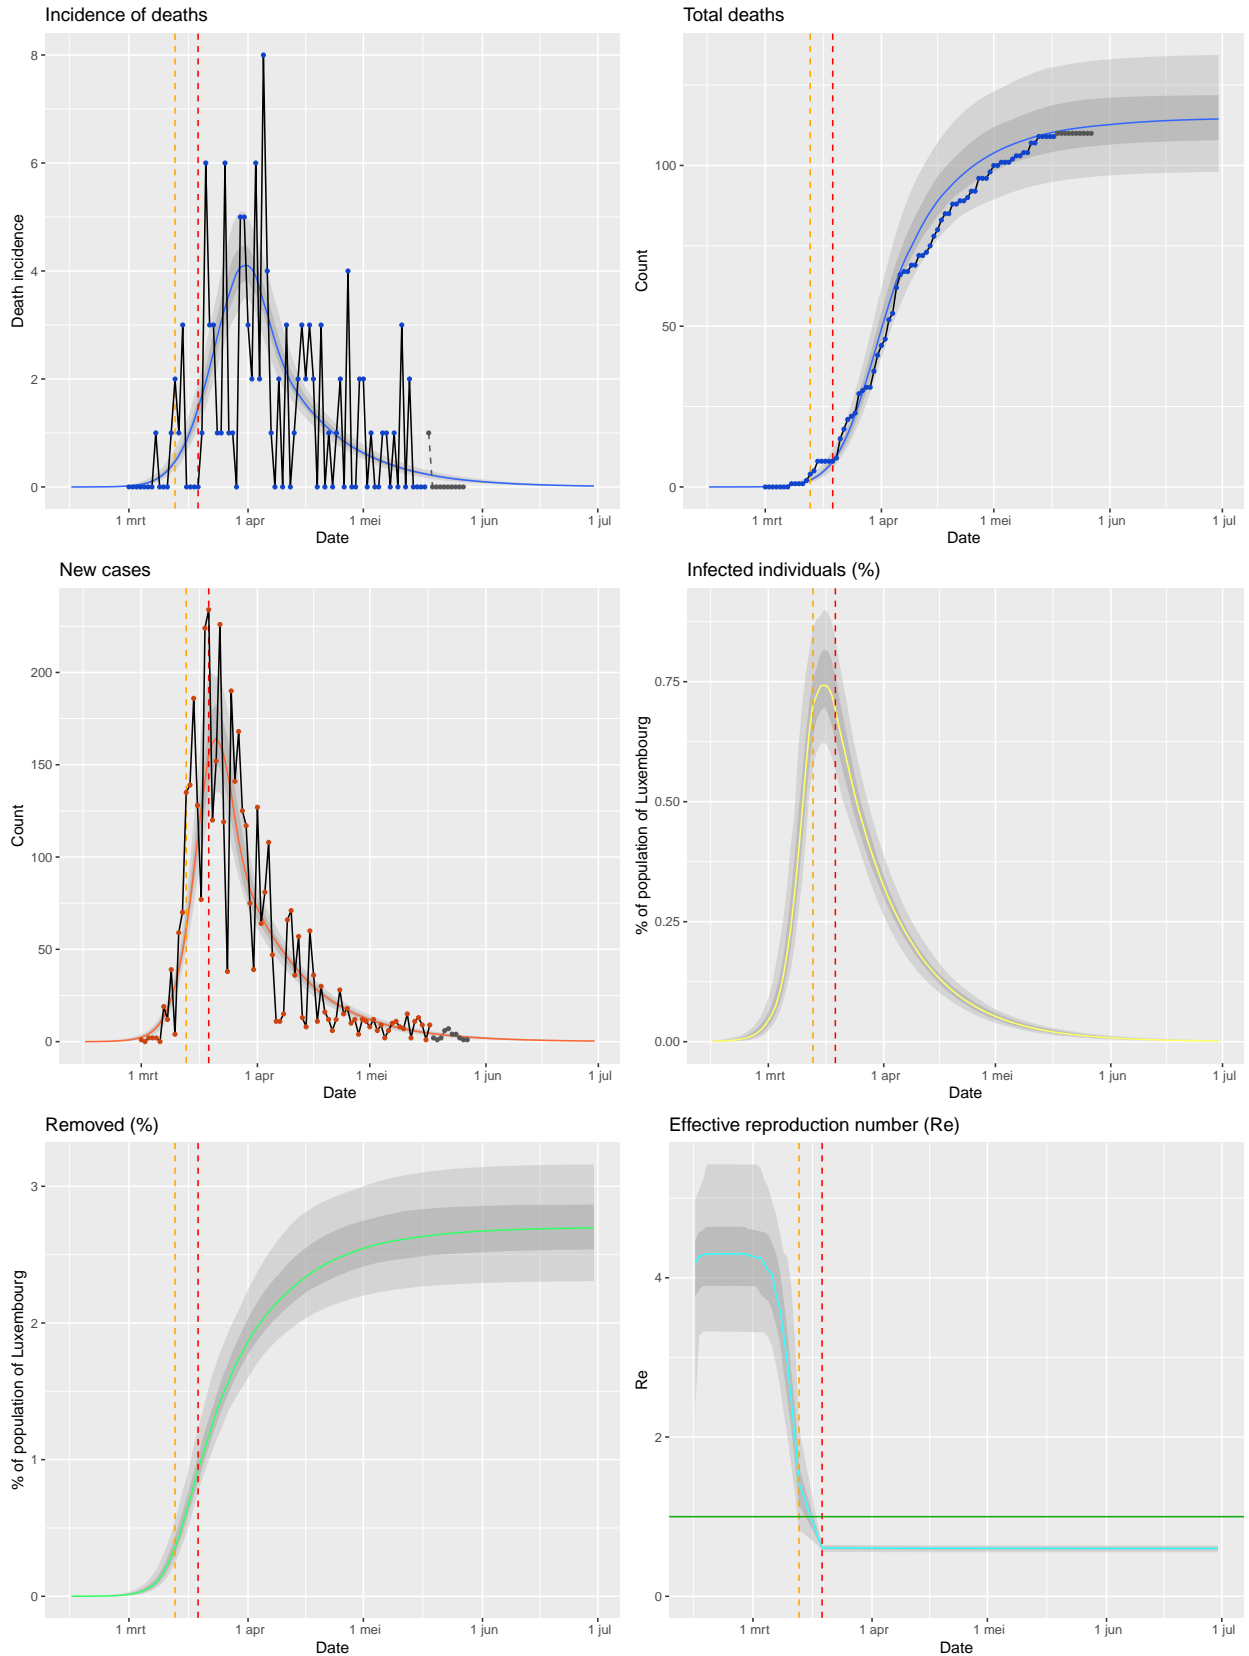

# 21 Moldova

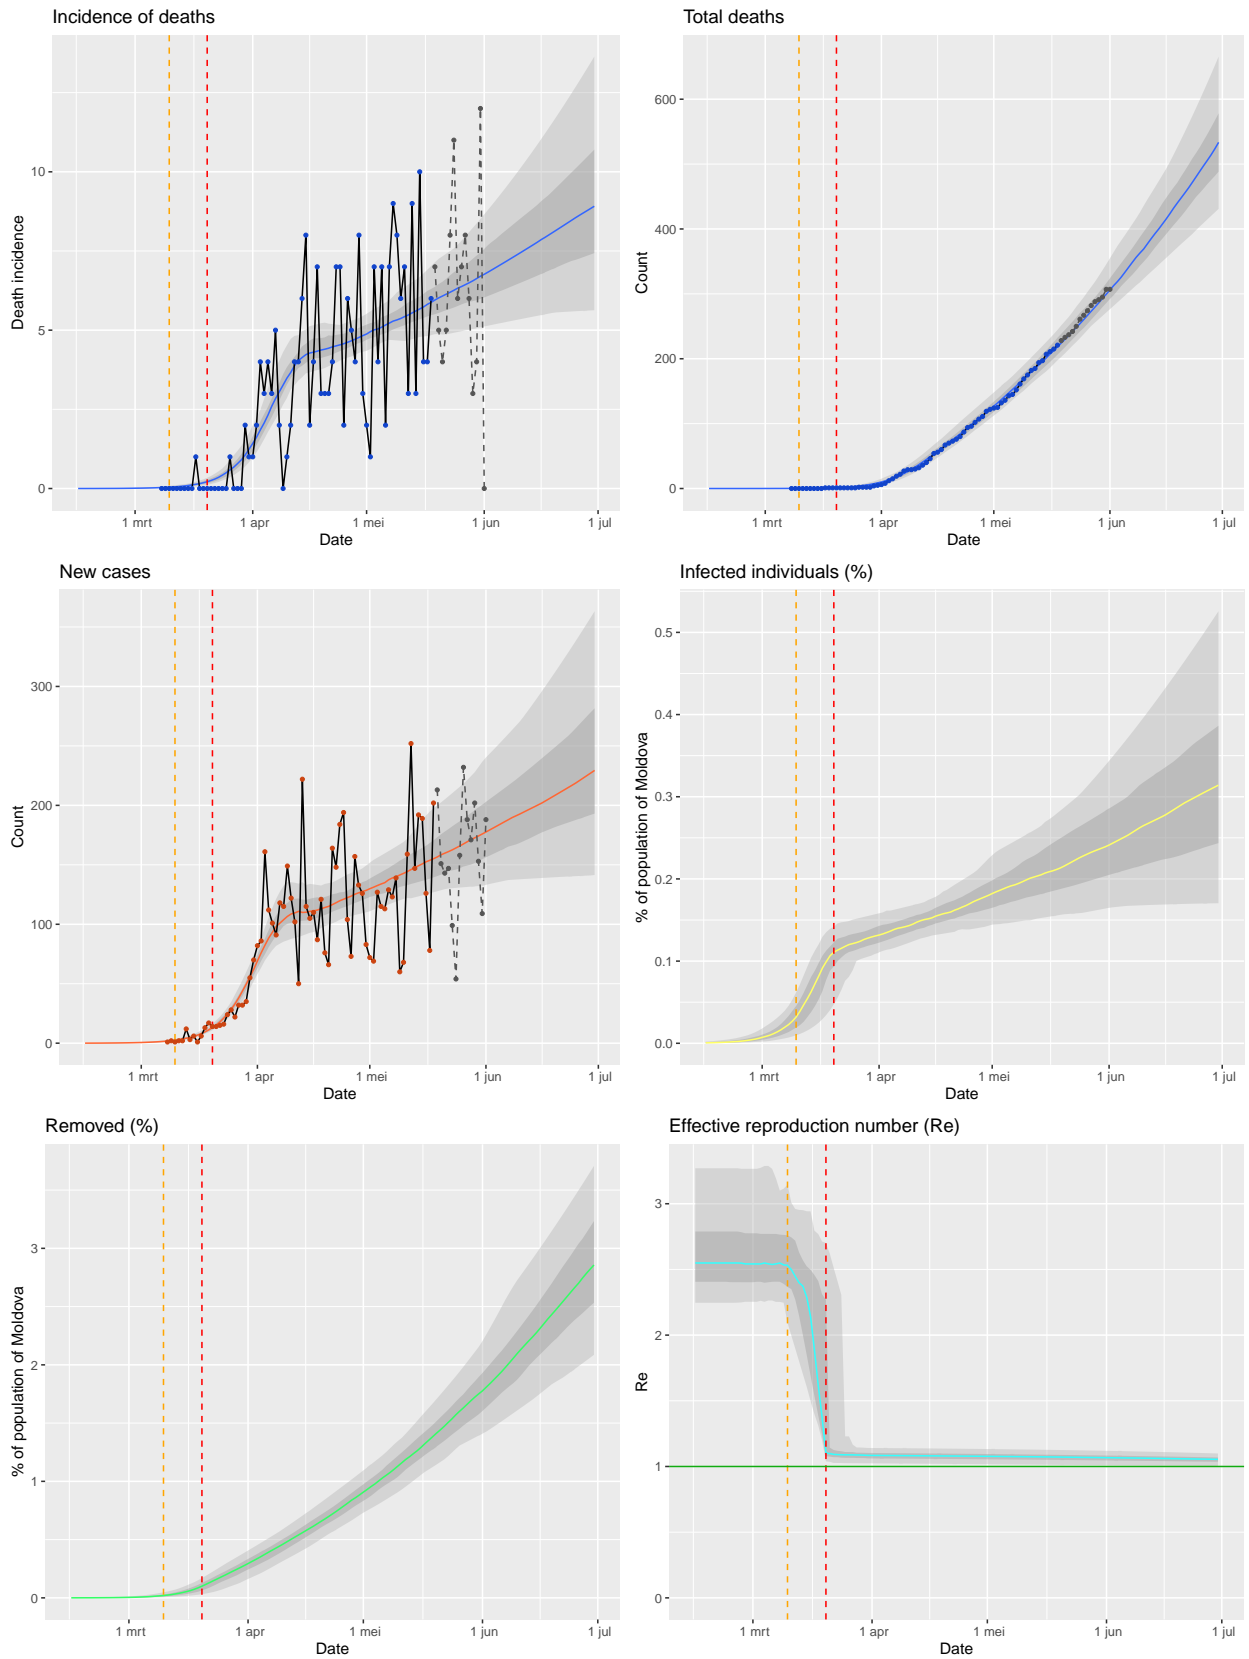

## 22 Netherlands

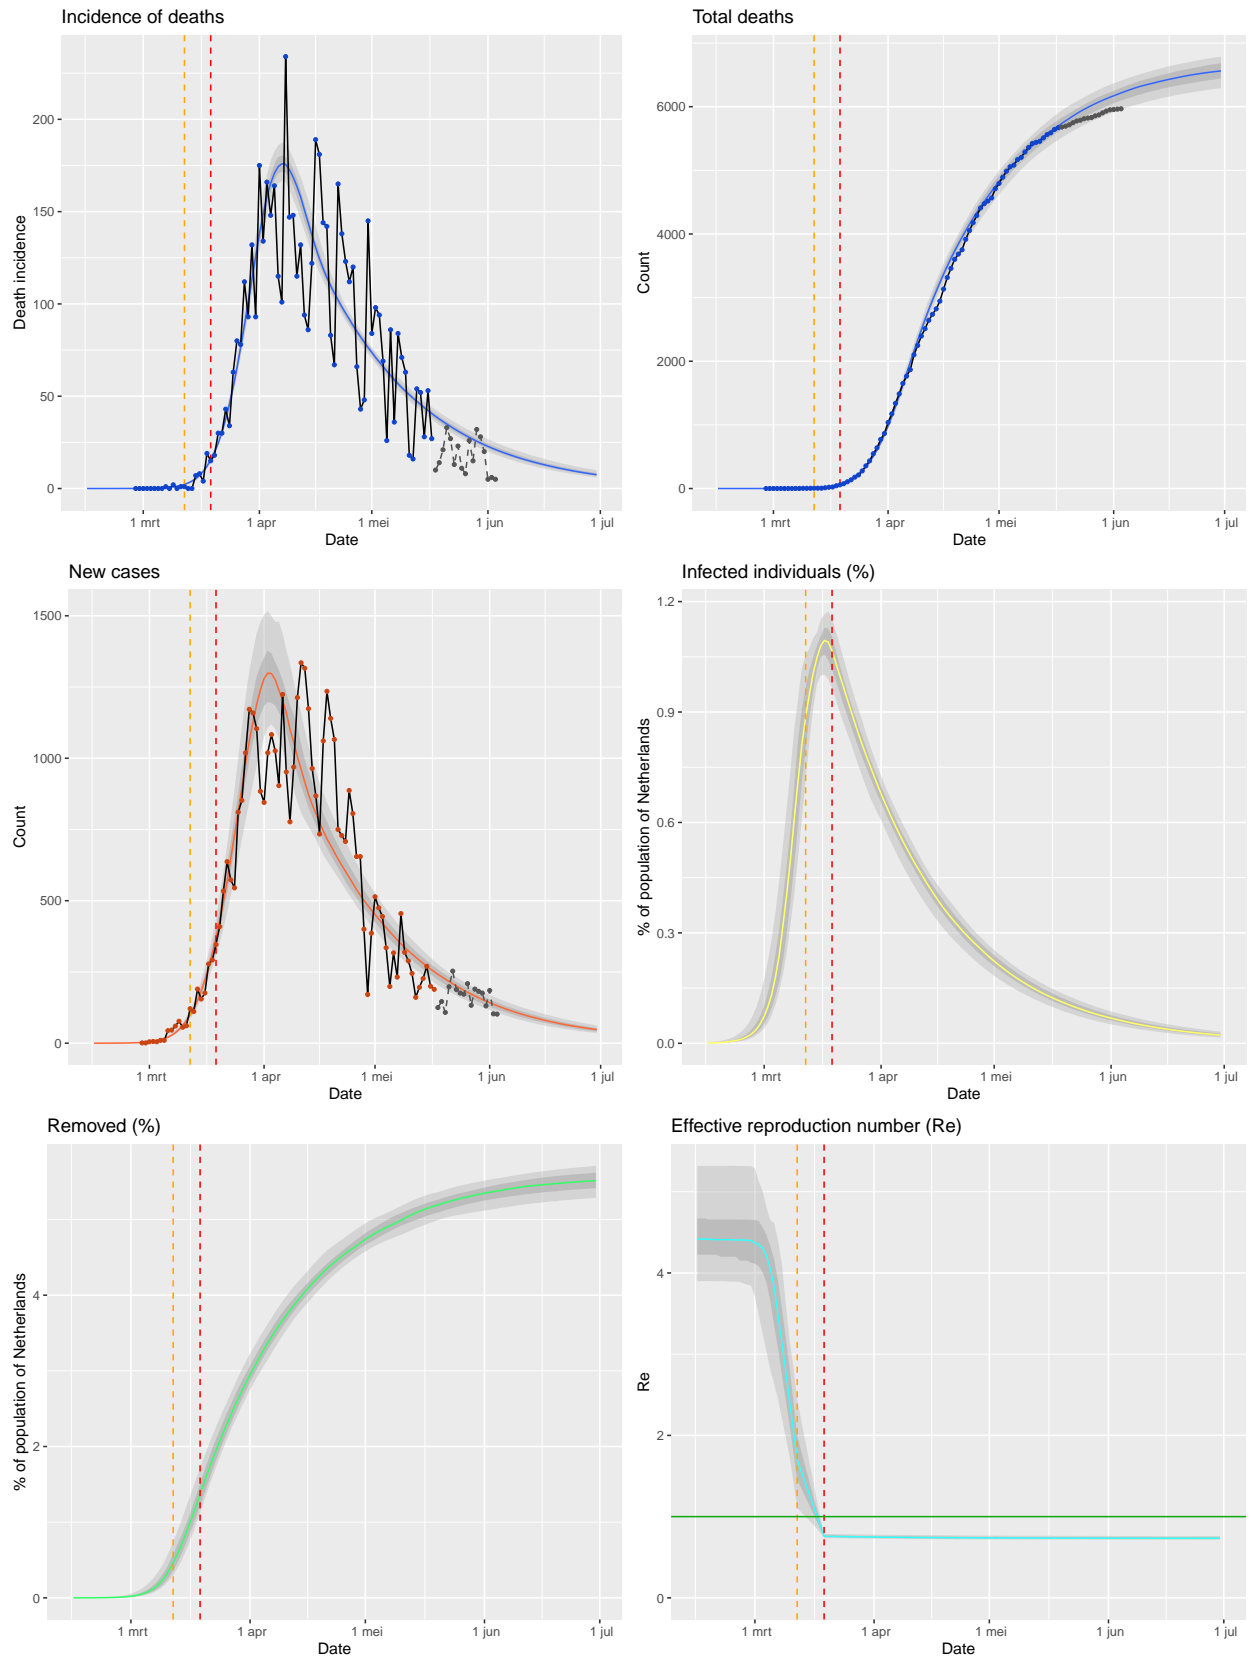

## 23 North Macedonia

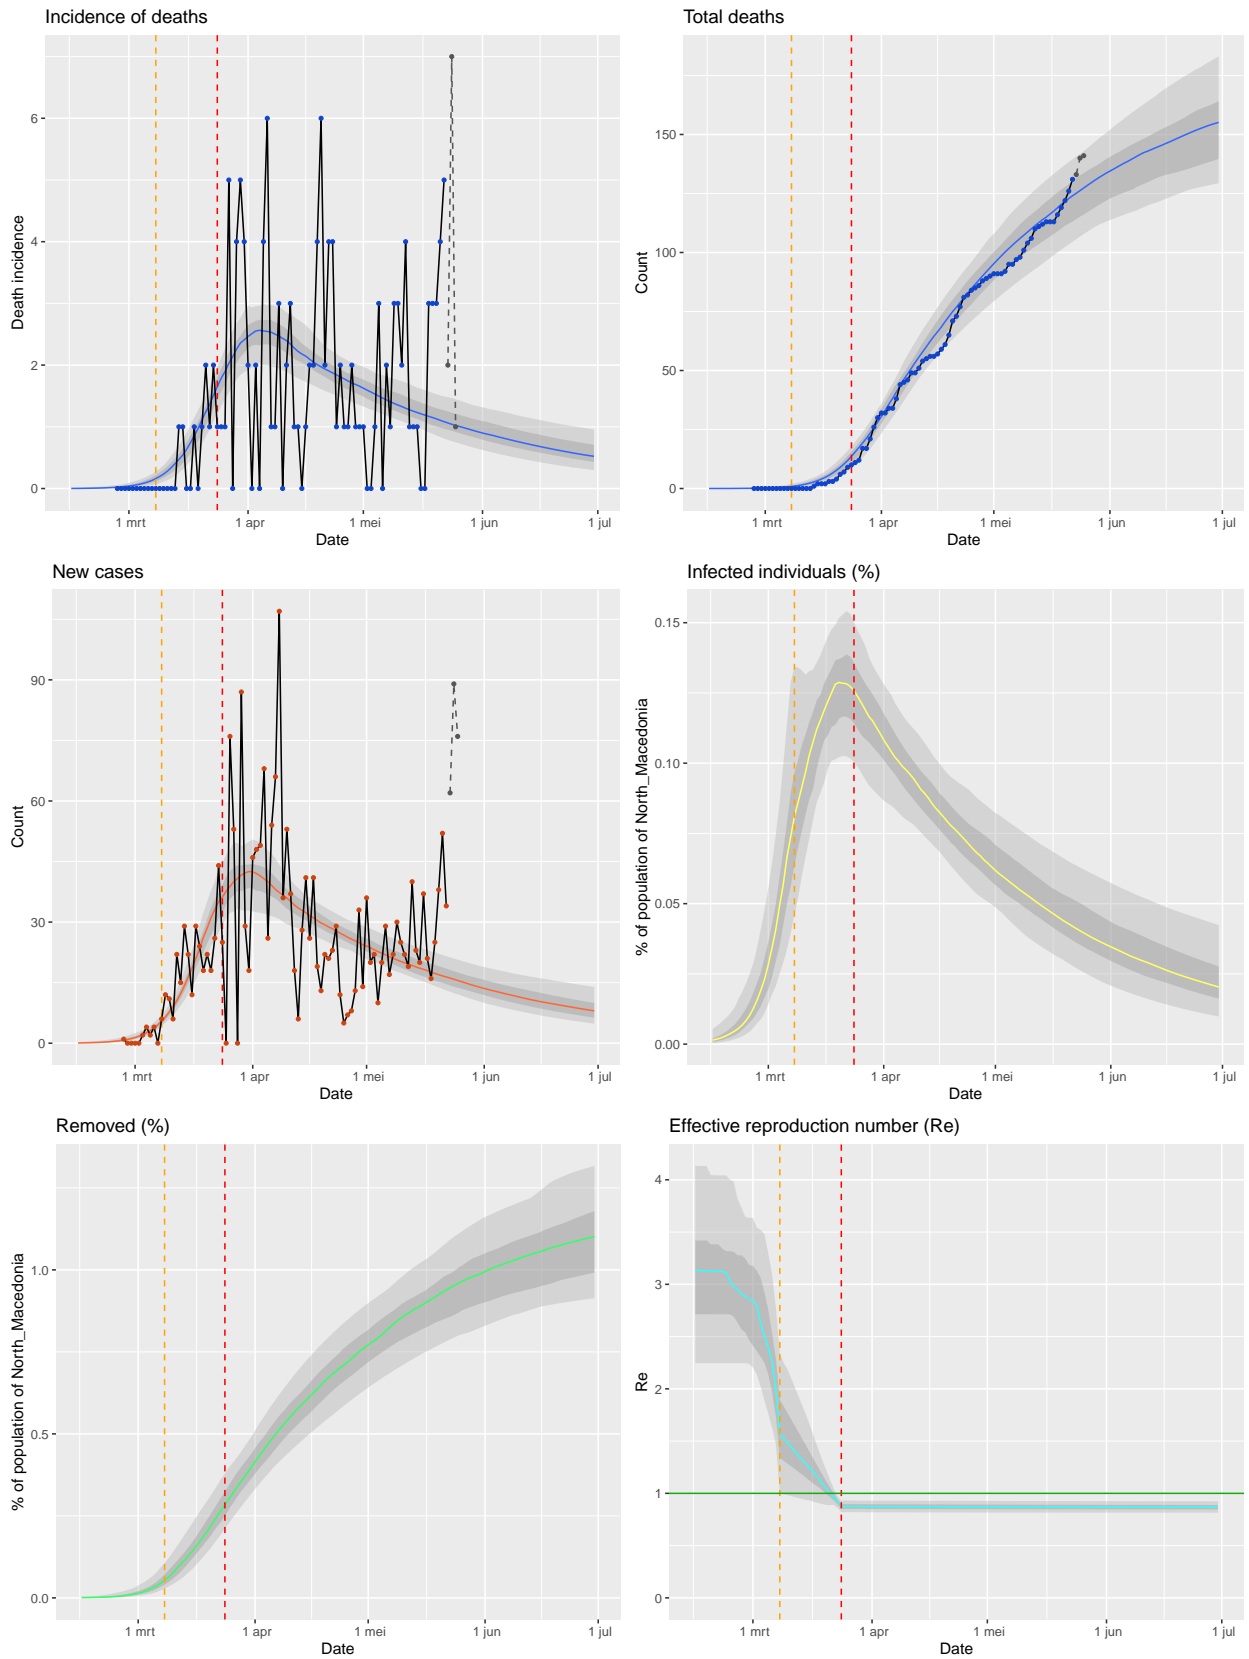



# 24 Norway

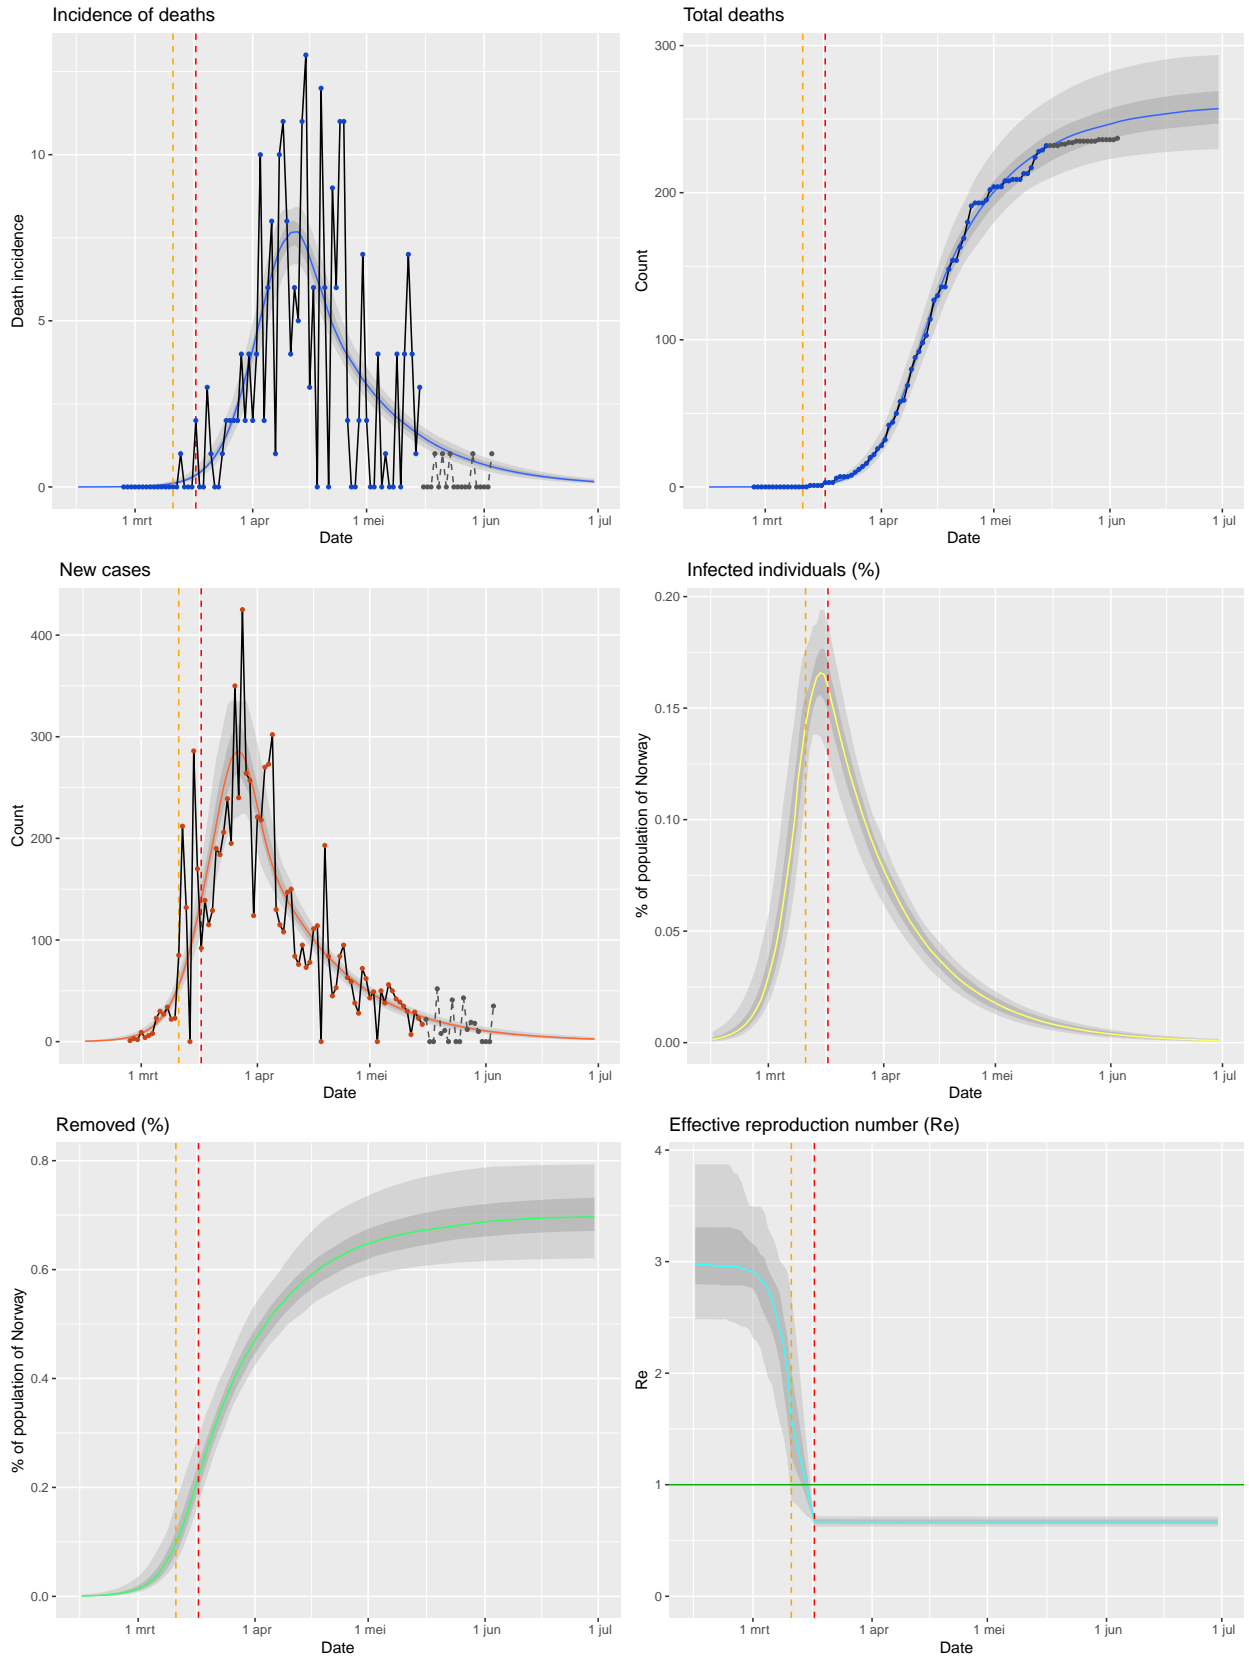

# 25 Poland

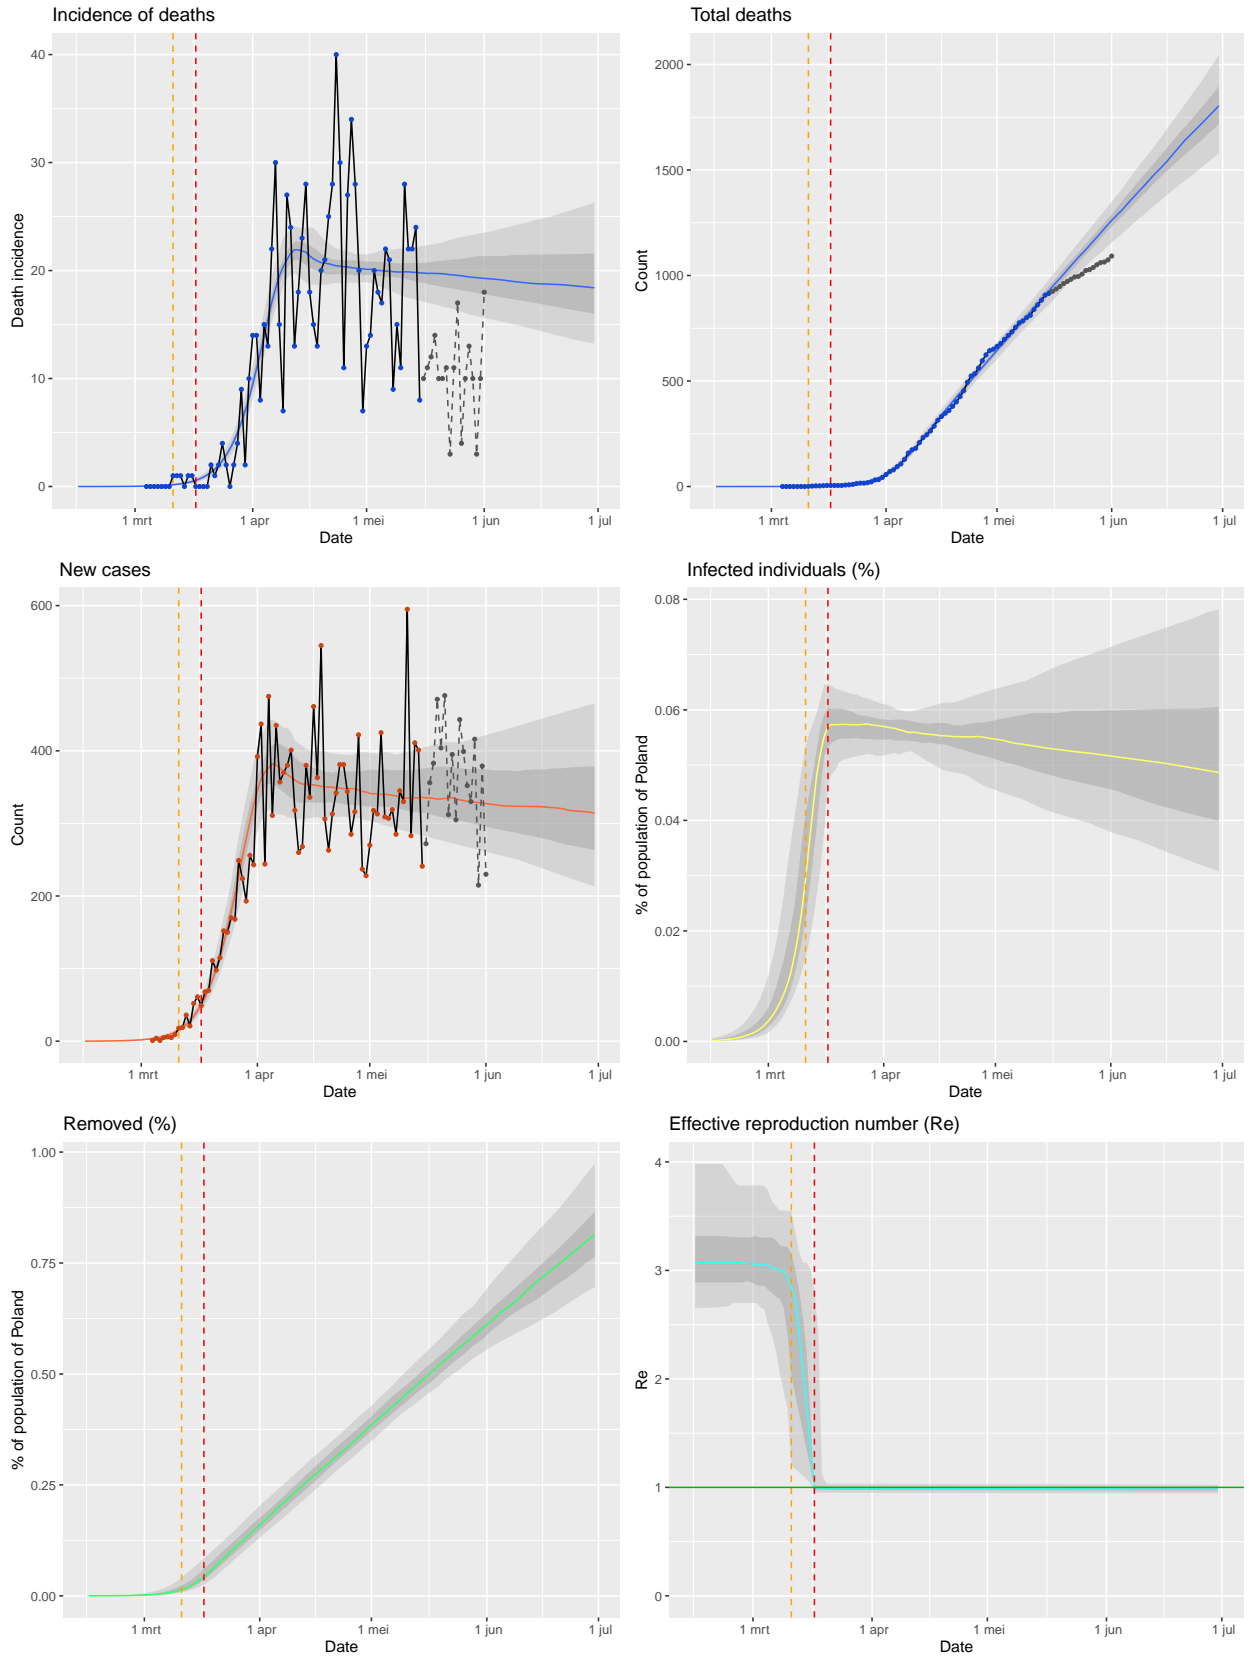

# 26 Portugal

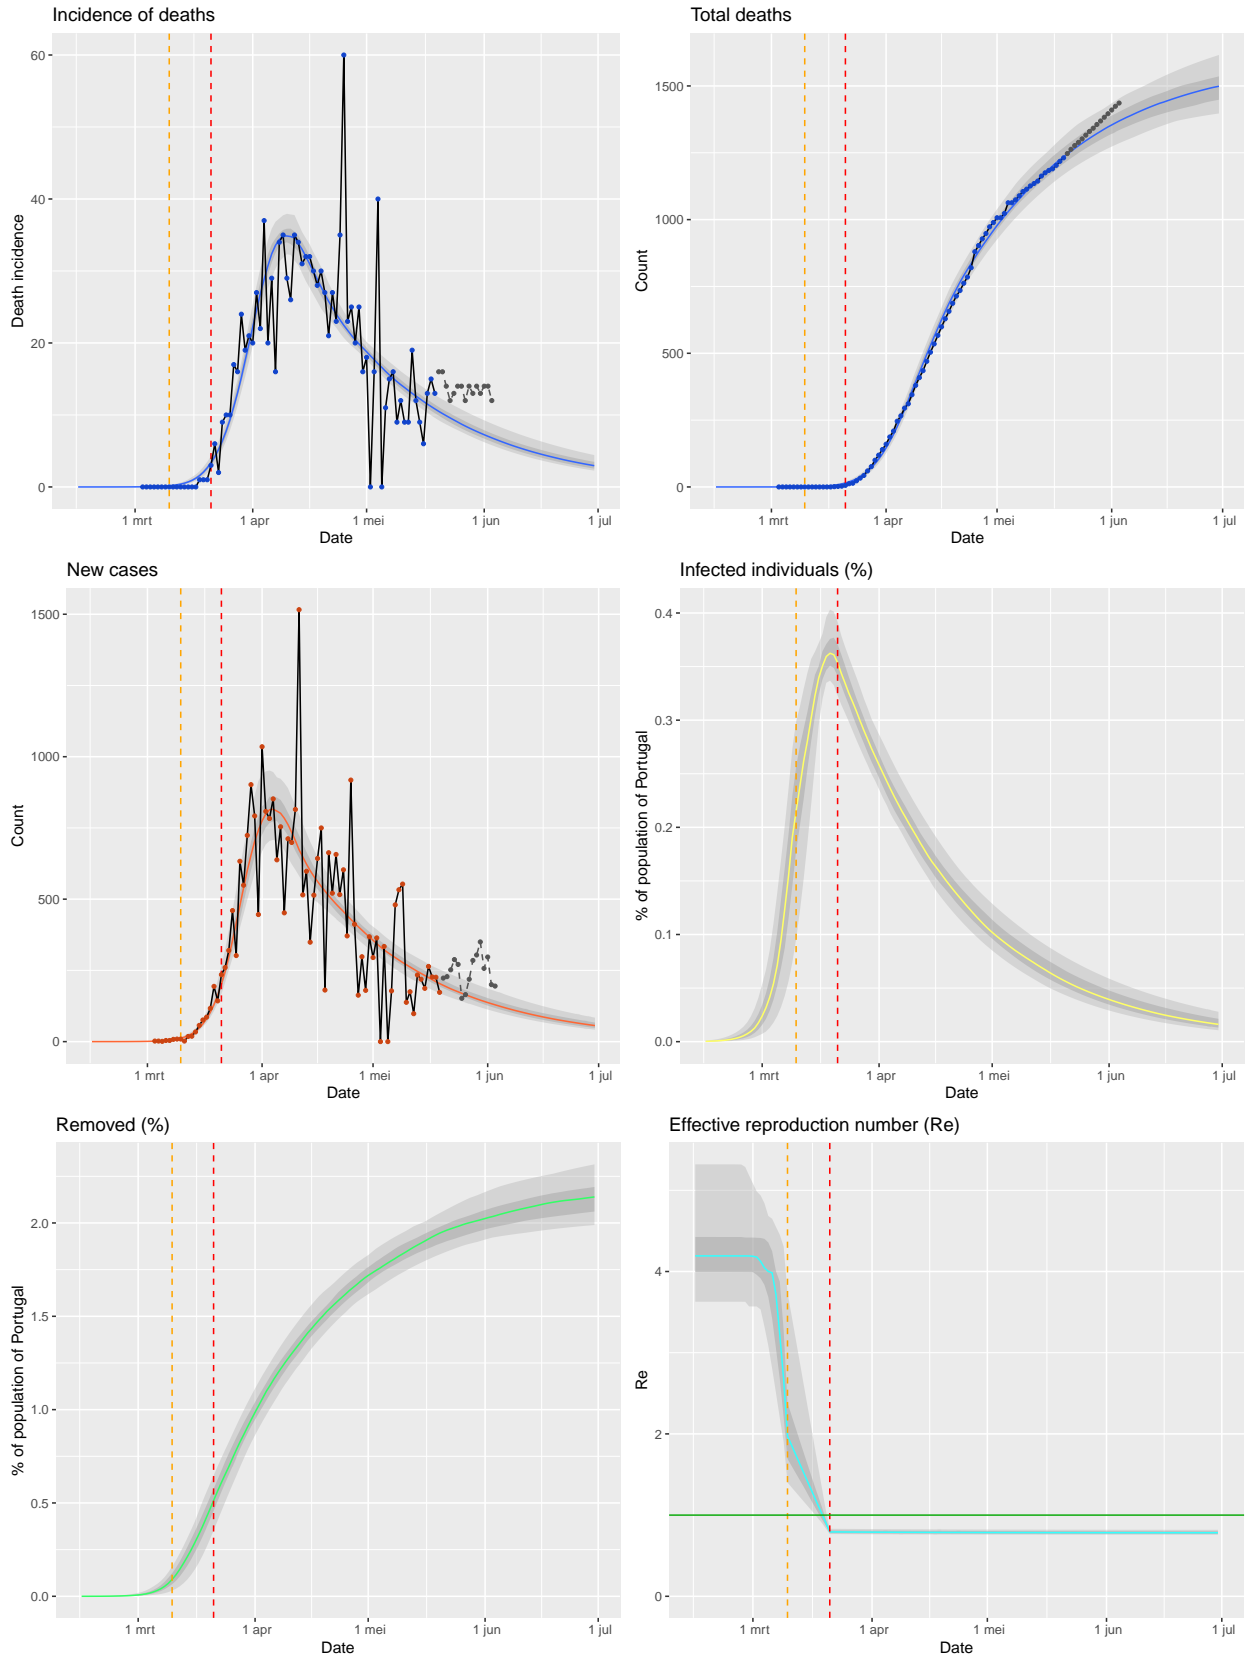

# 27 Romania

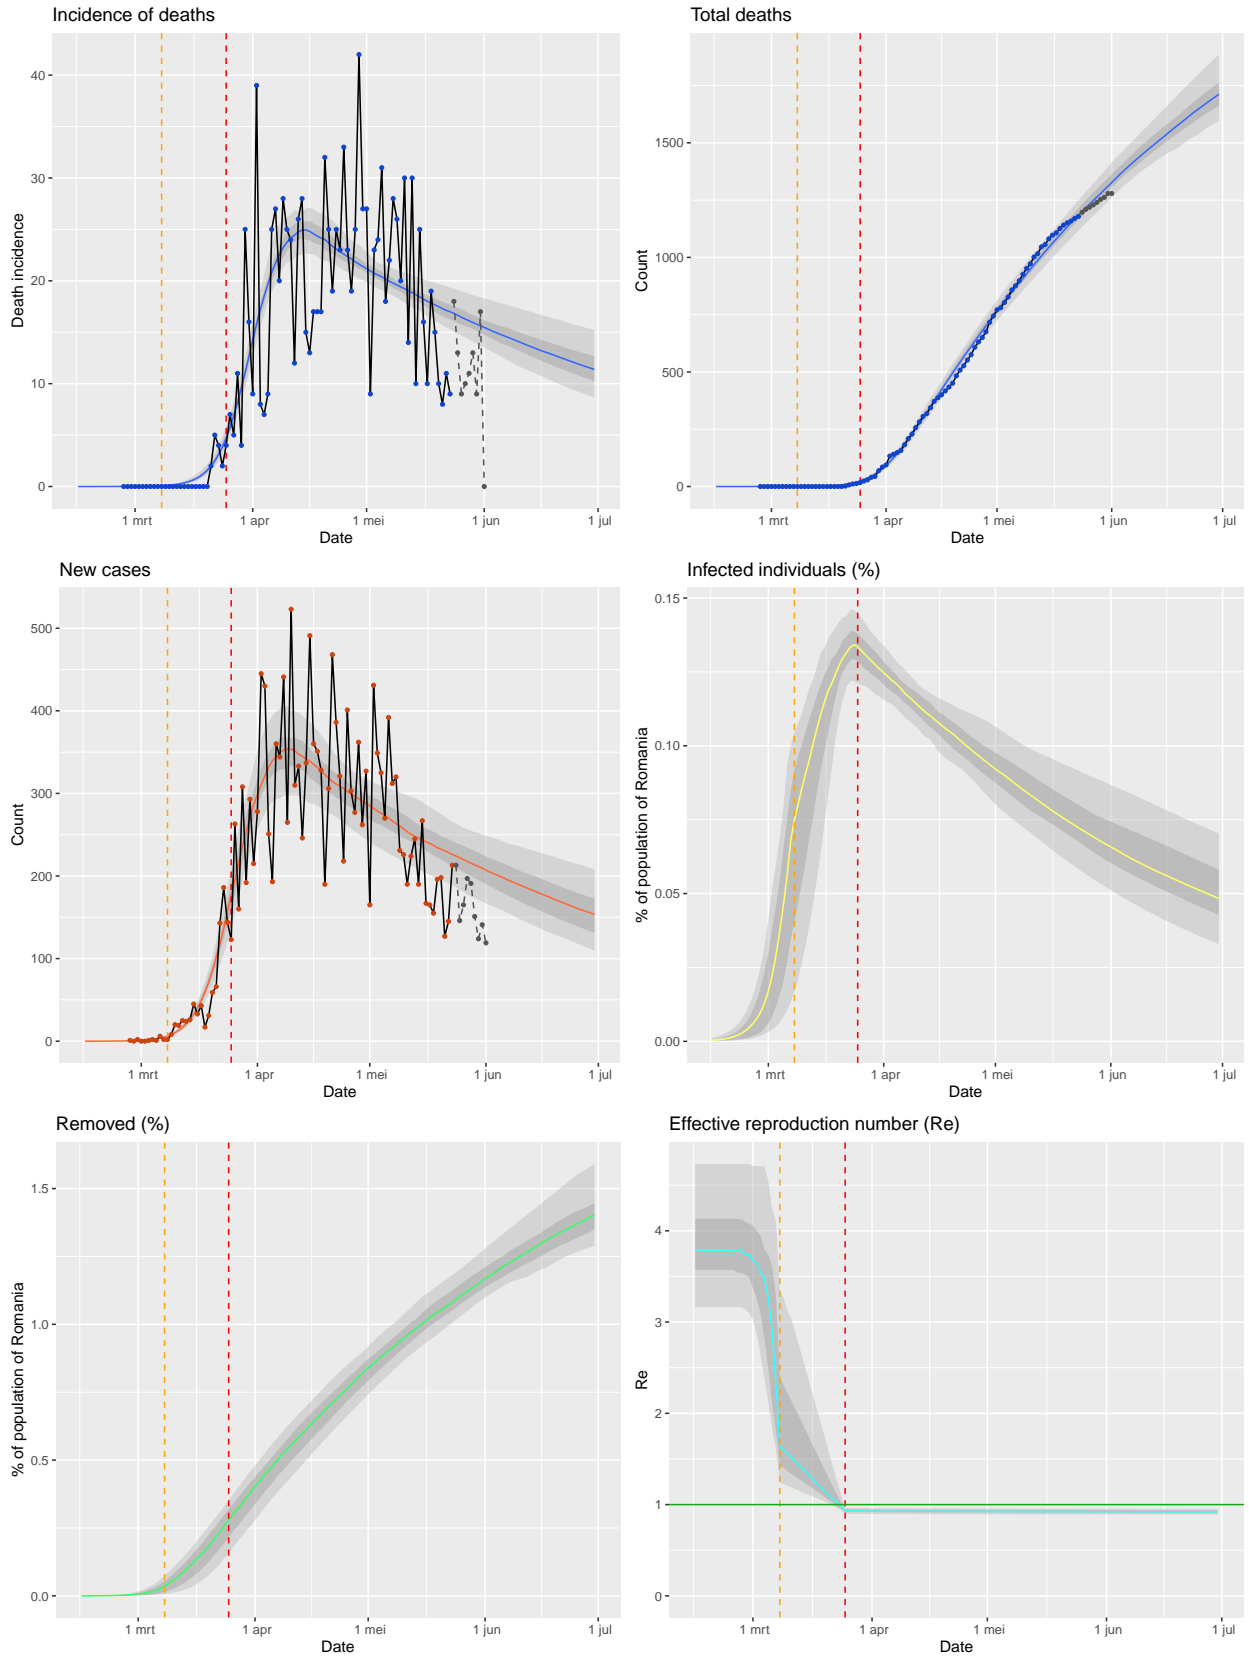

# 28 Serbia

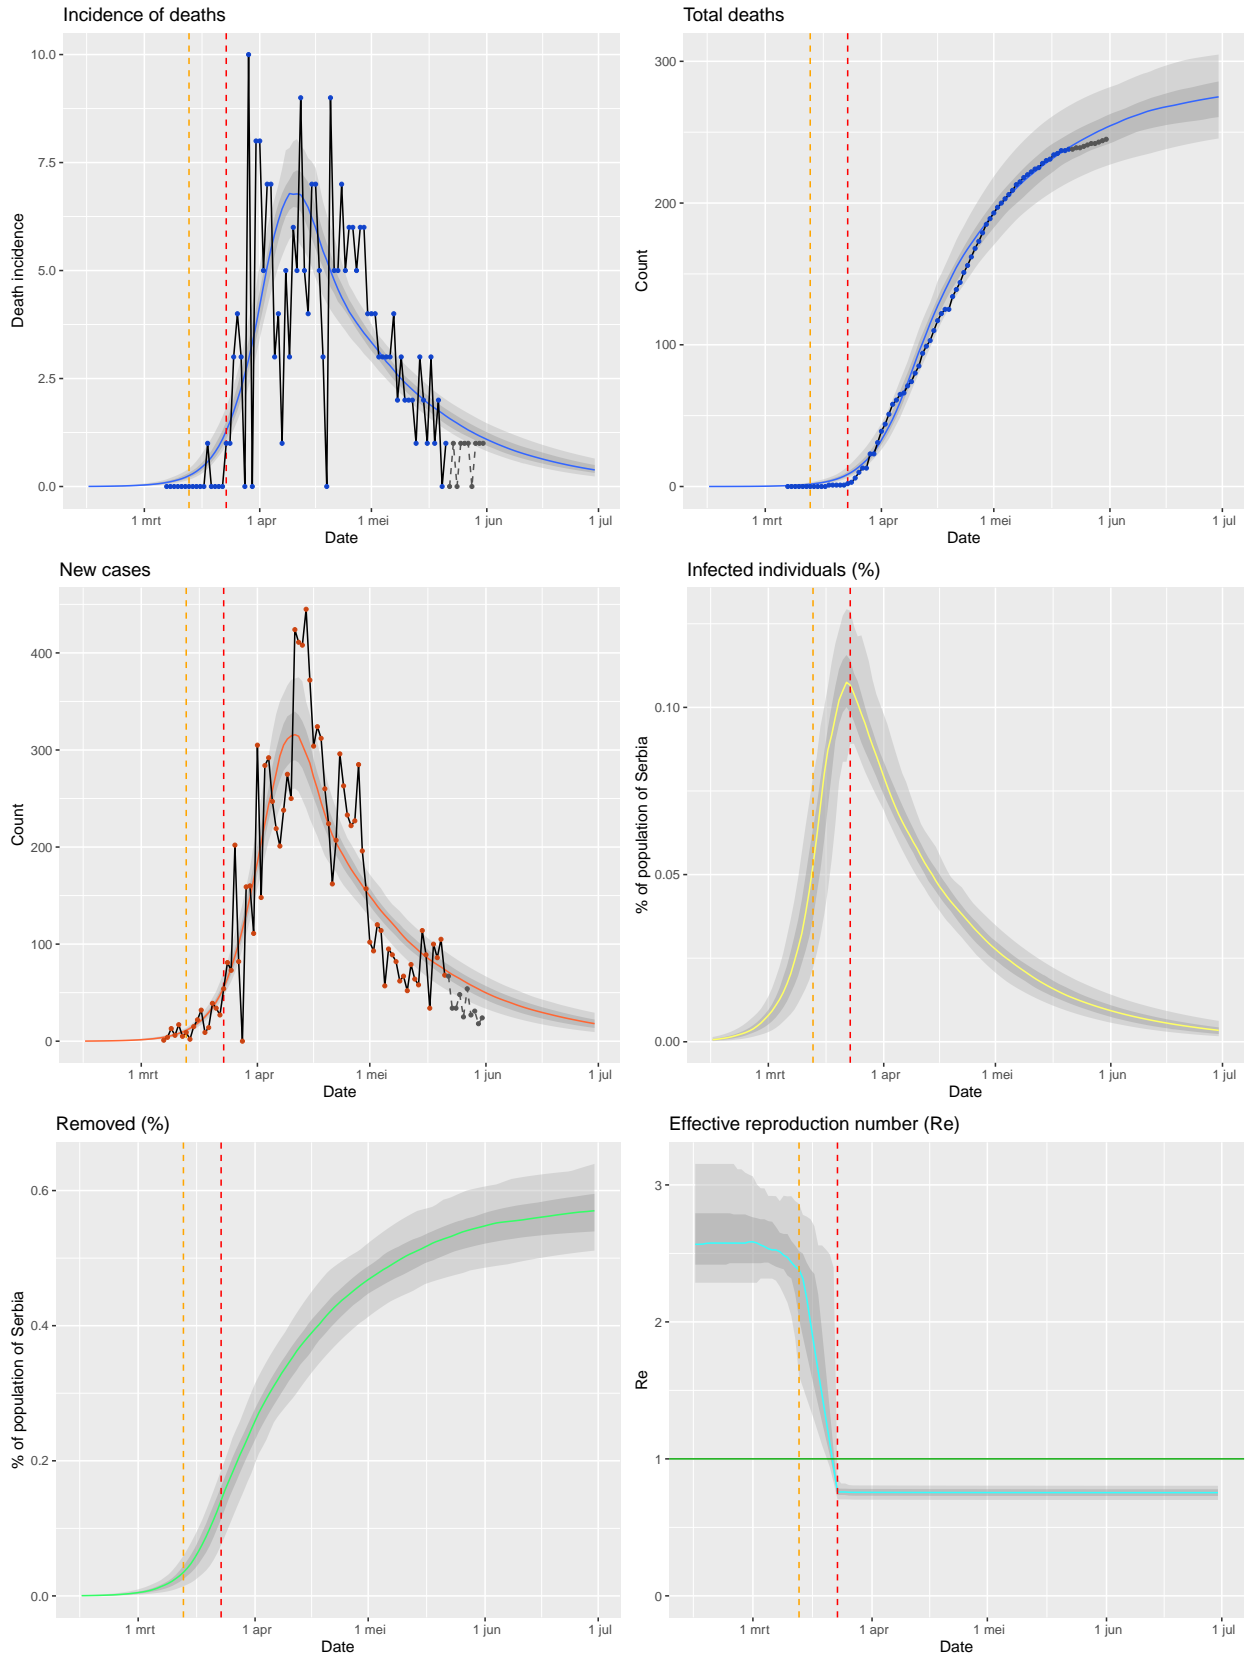

# 29 Slovakia

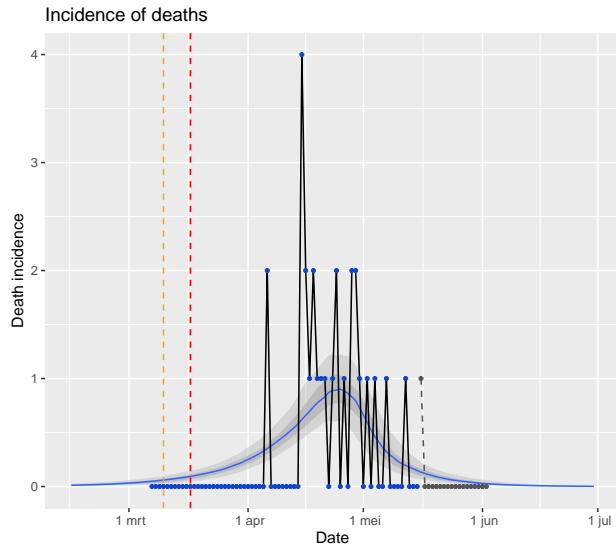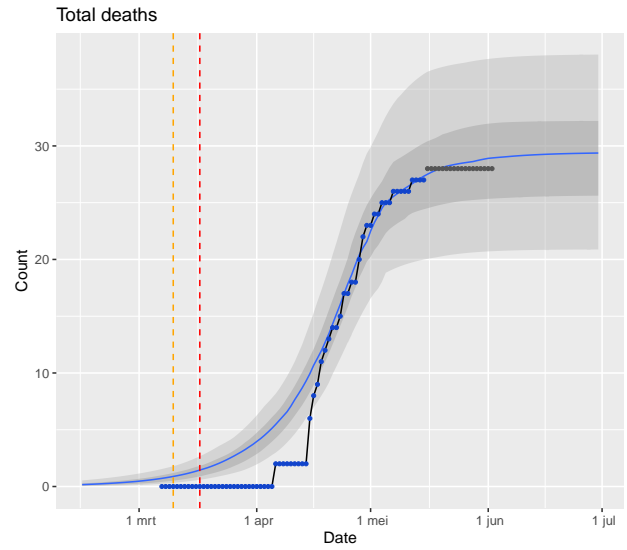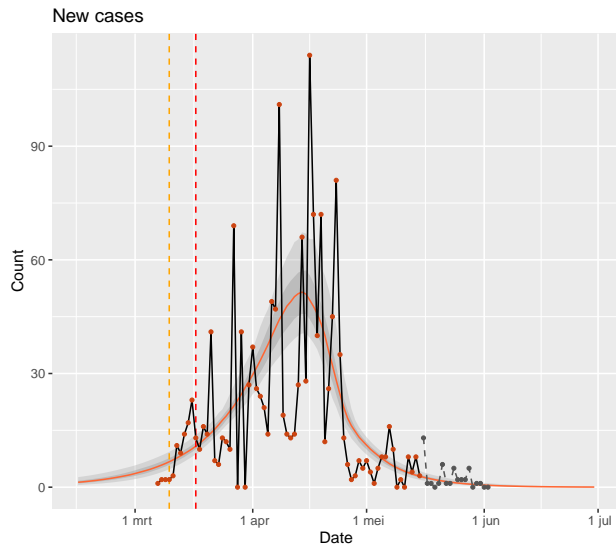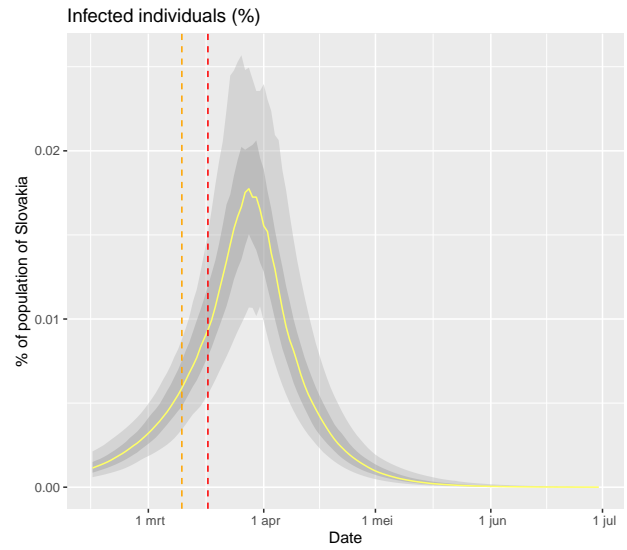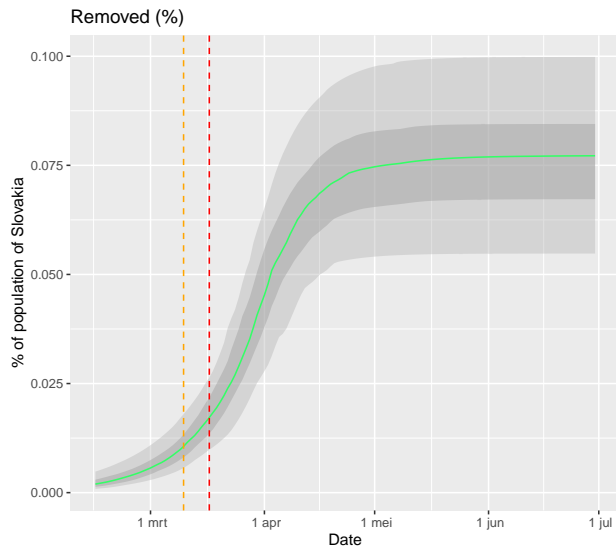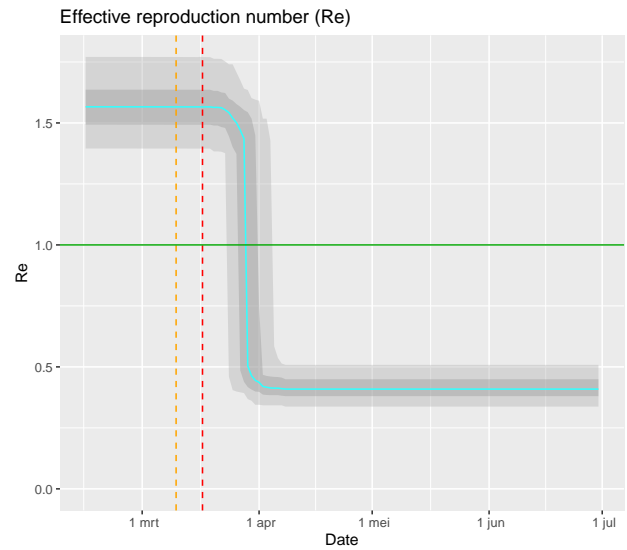

# 30 Slovenia

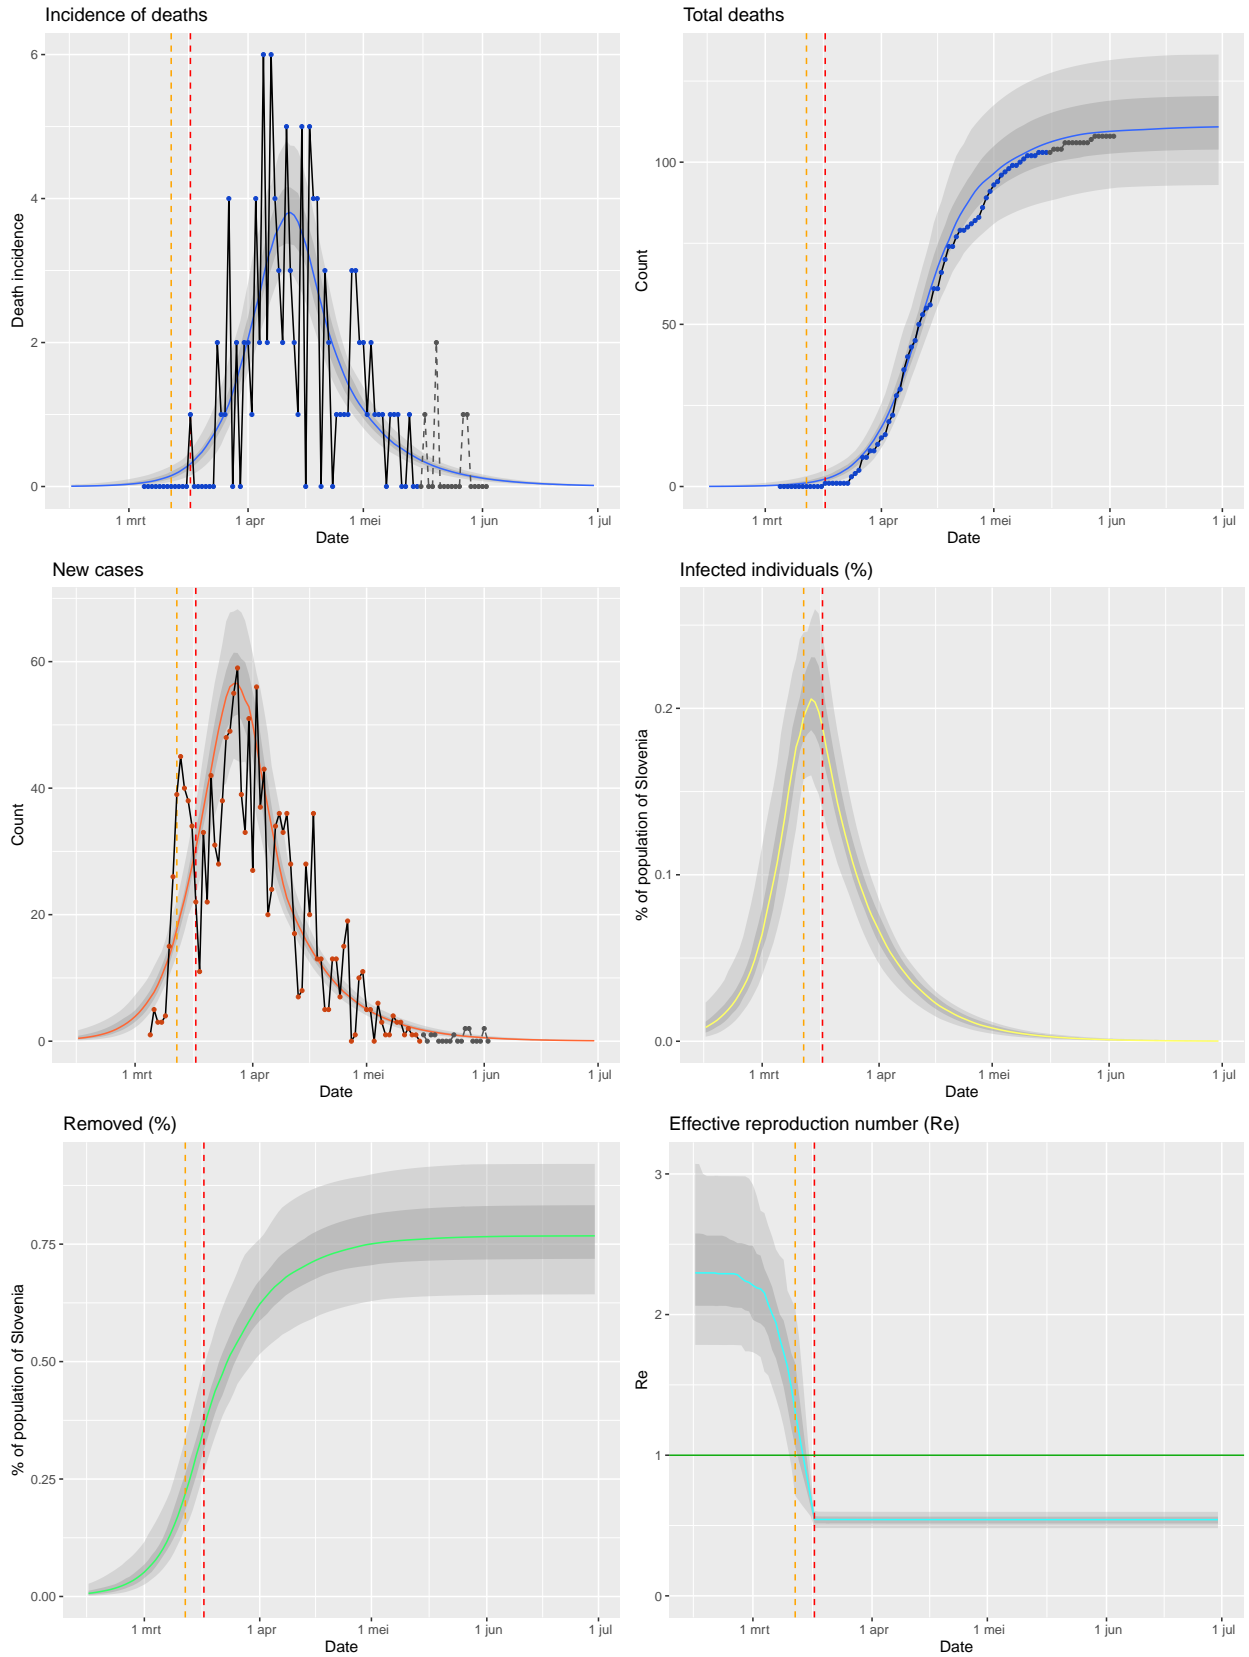

# 31 Spain

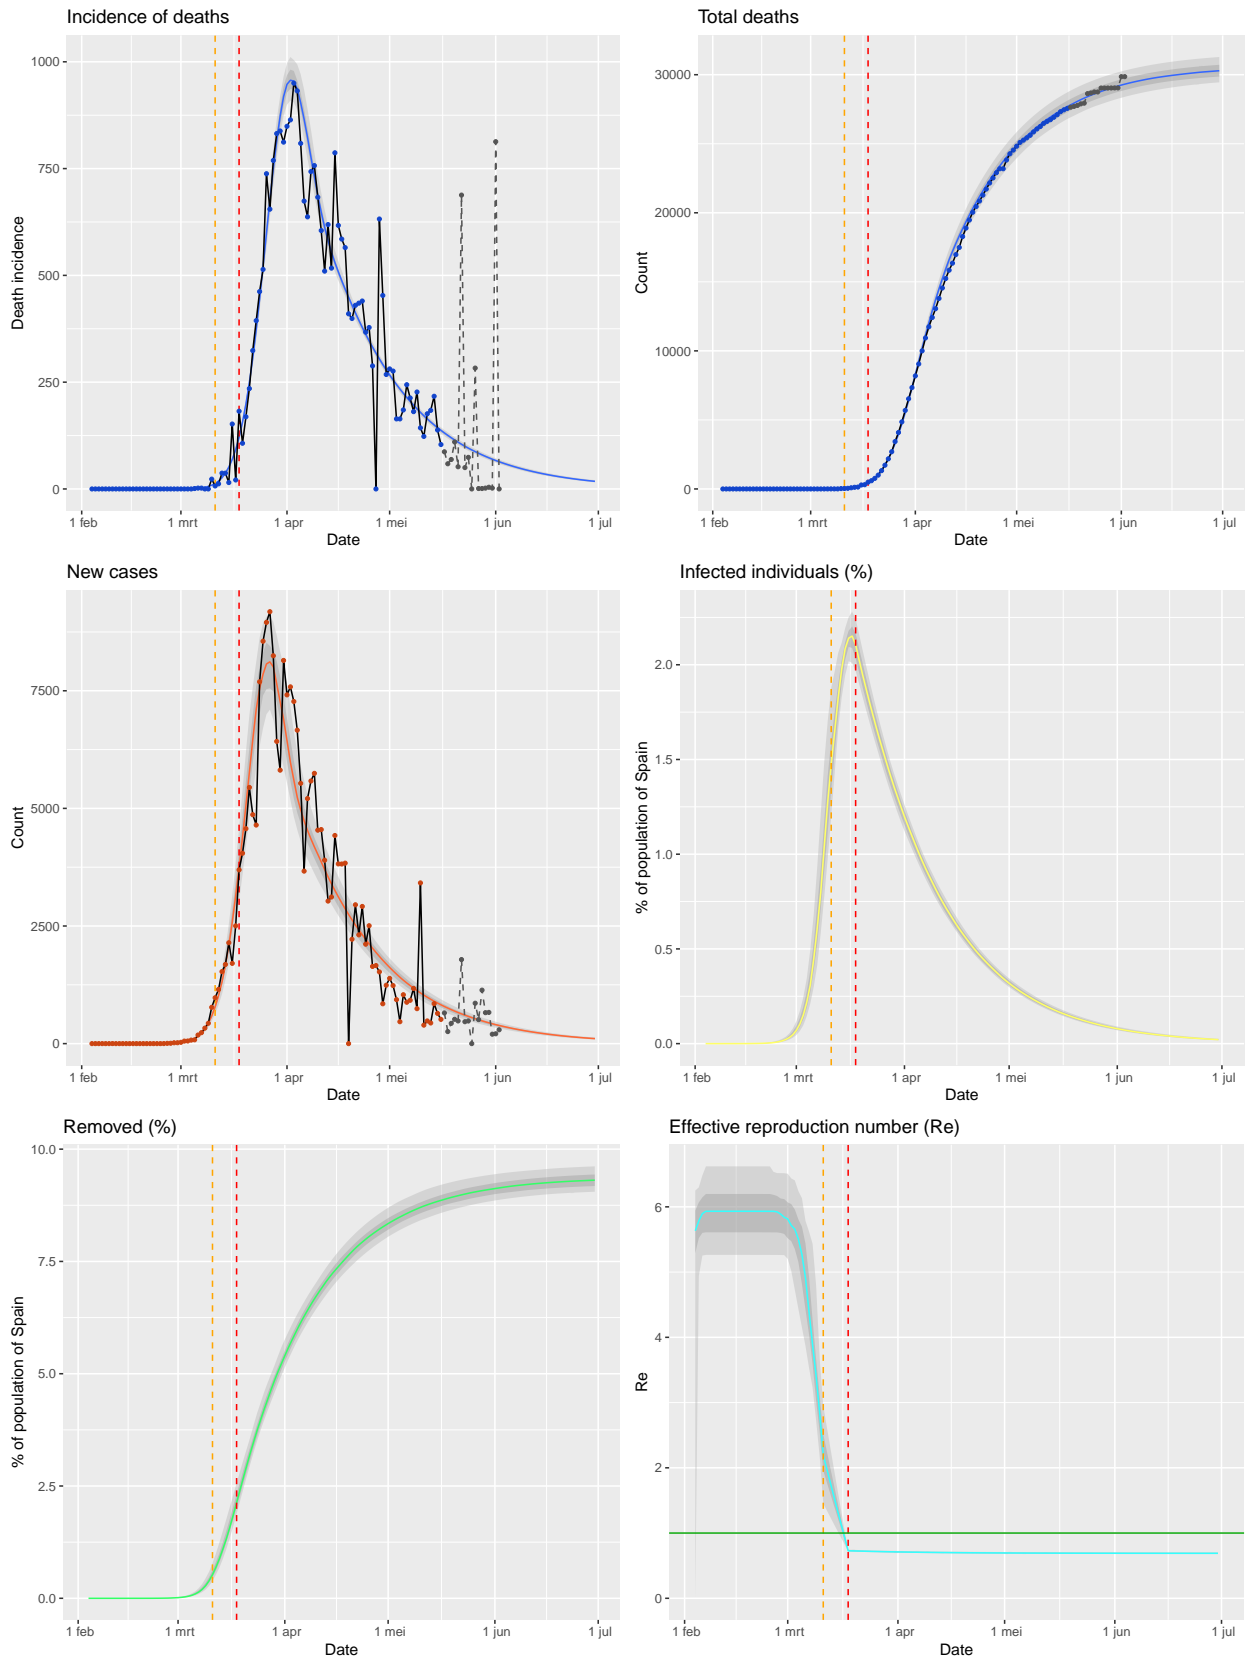



# 32 Sweden

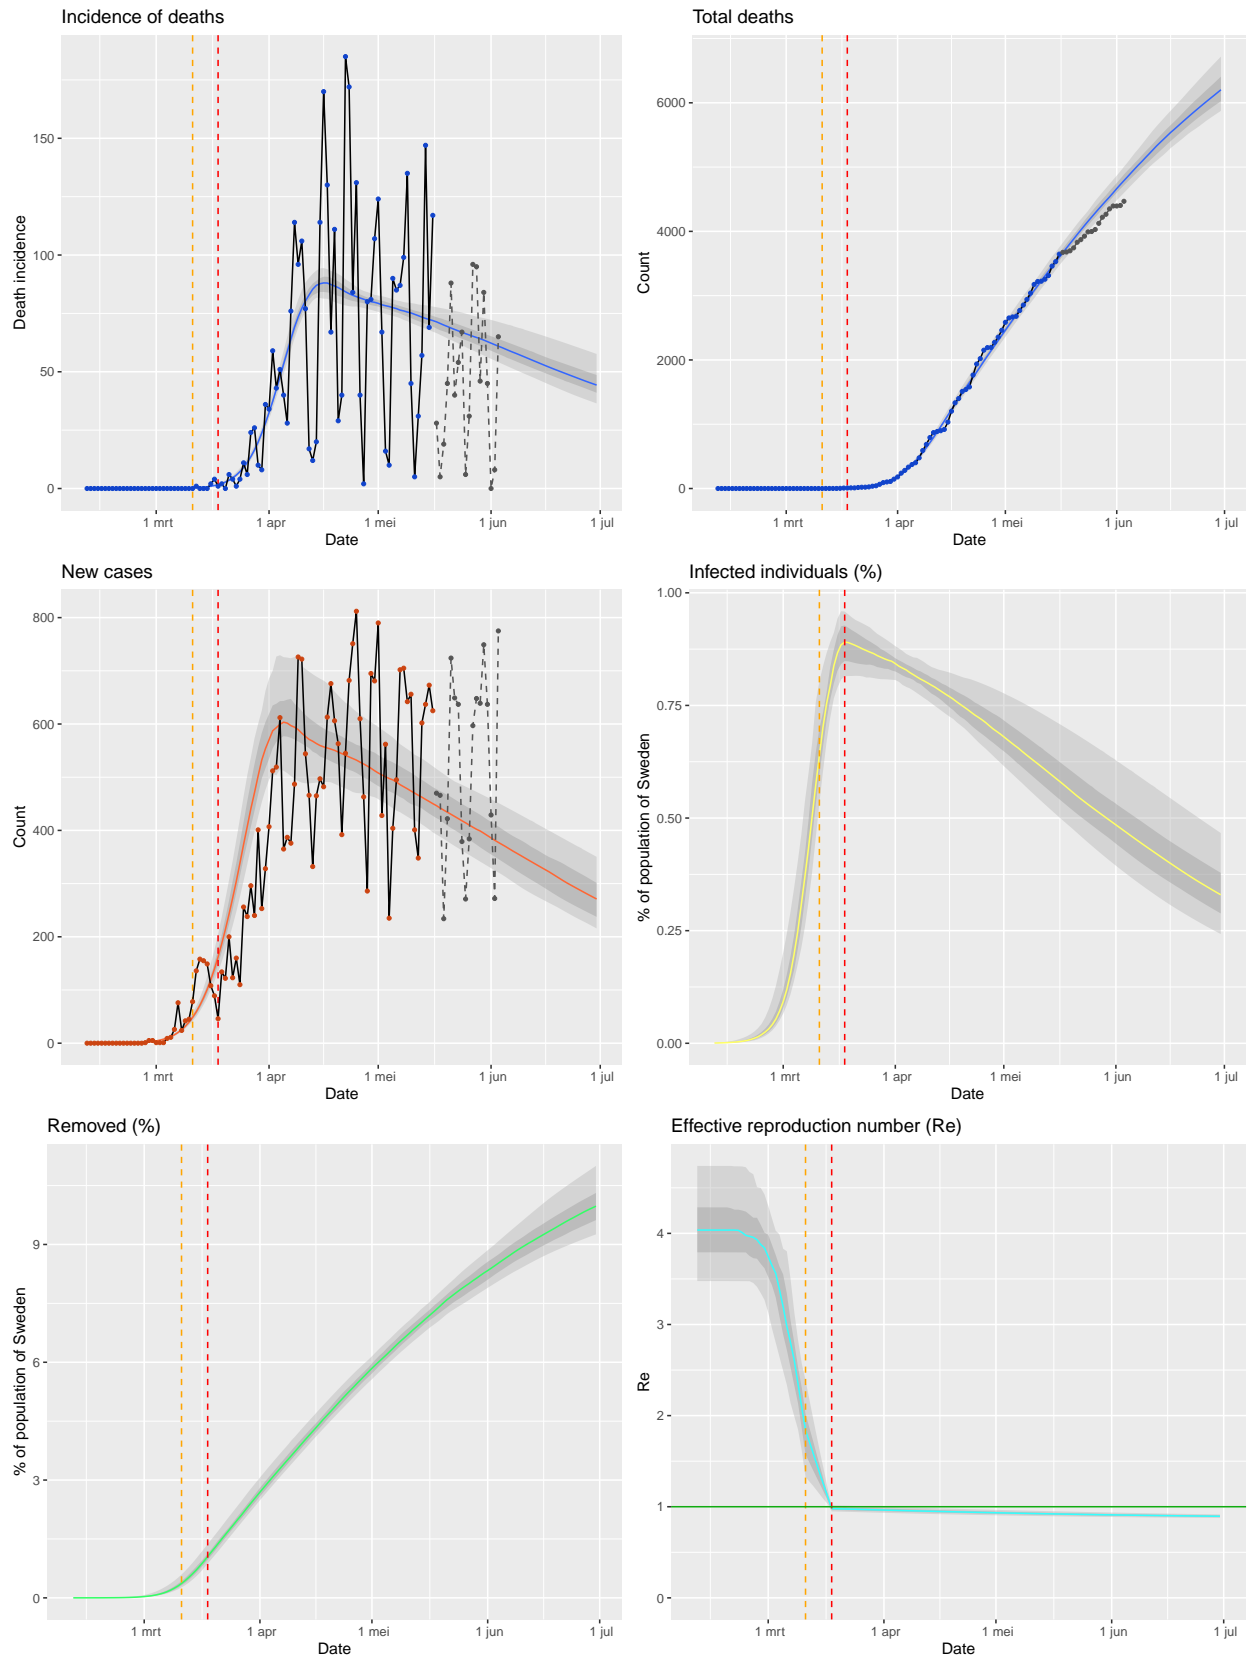

# 33 Switzerland

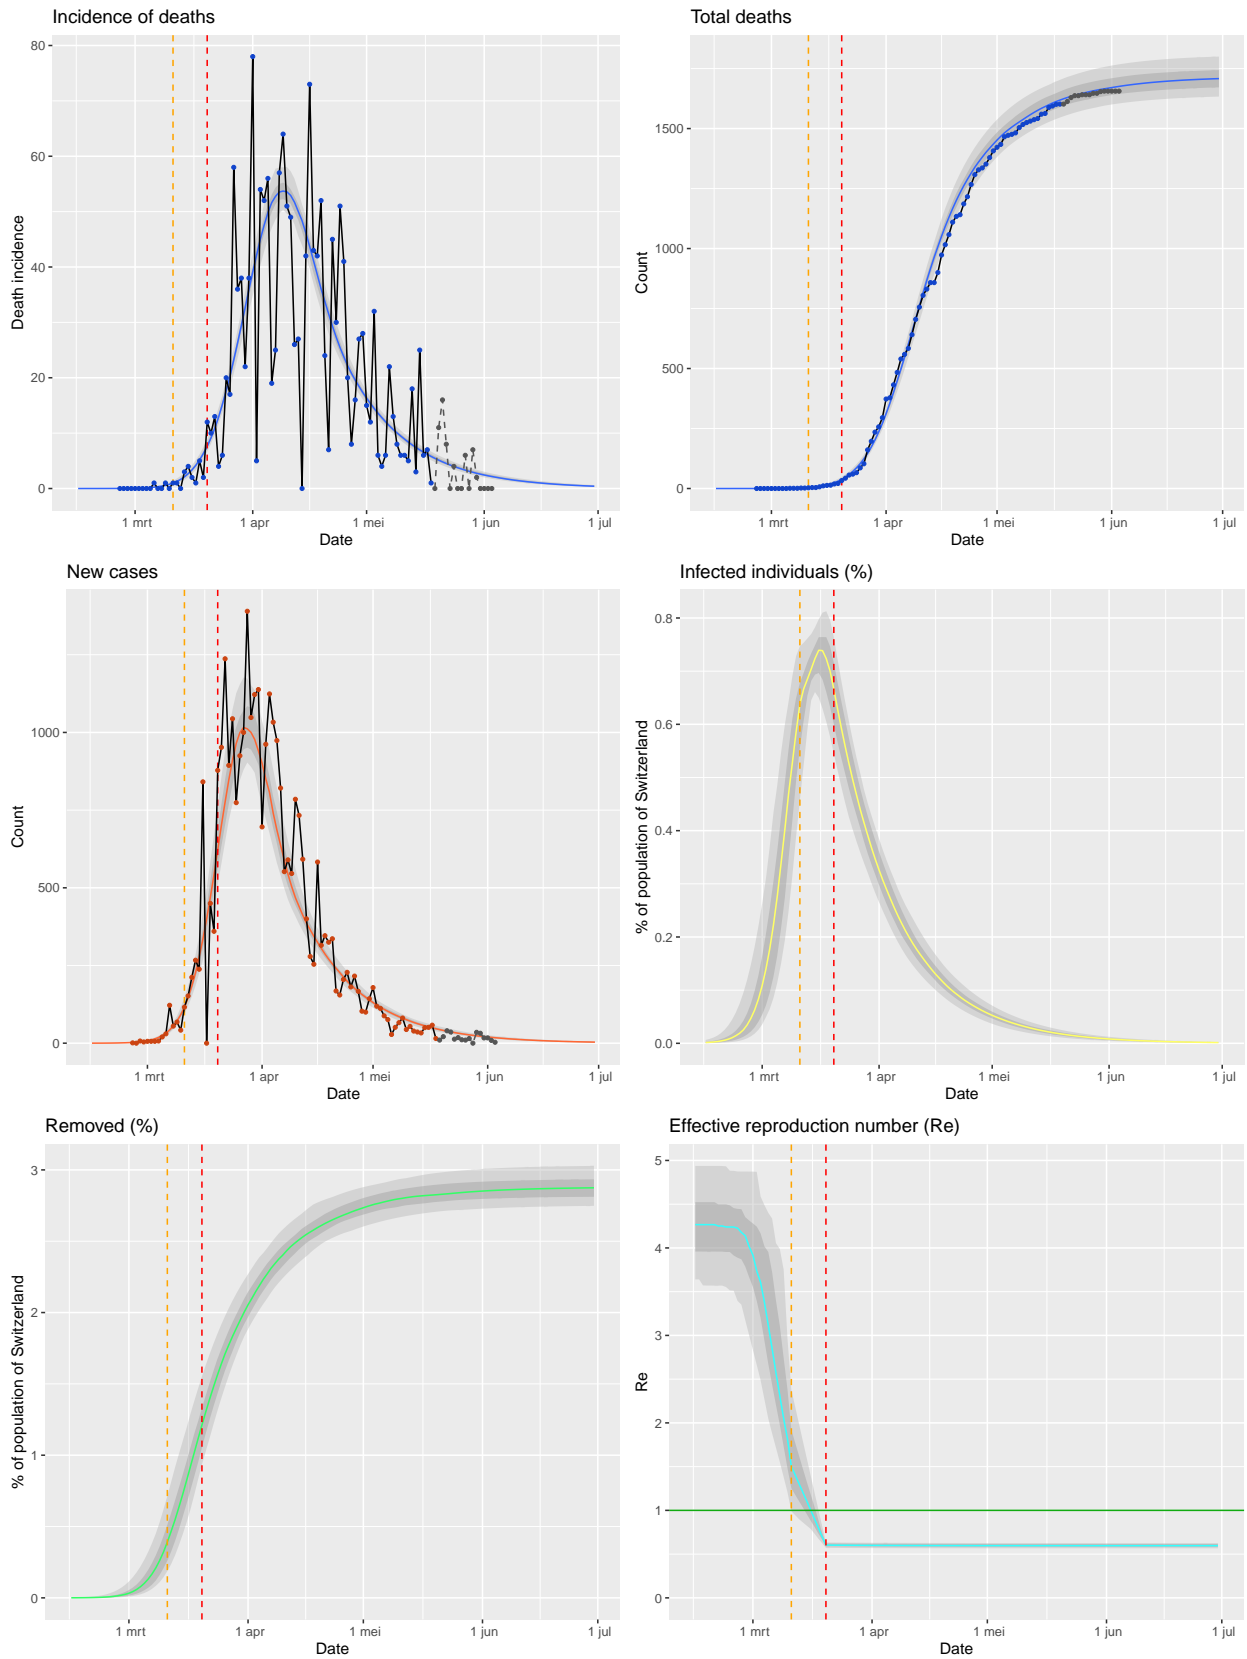

# 34 United Kingdom

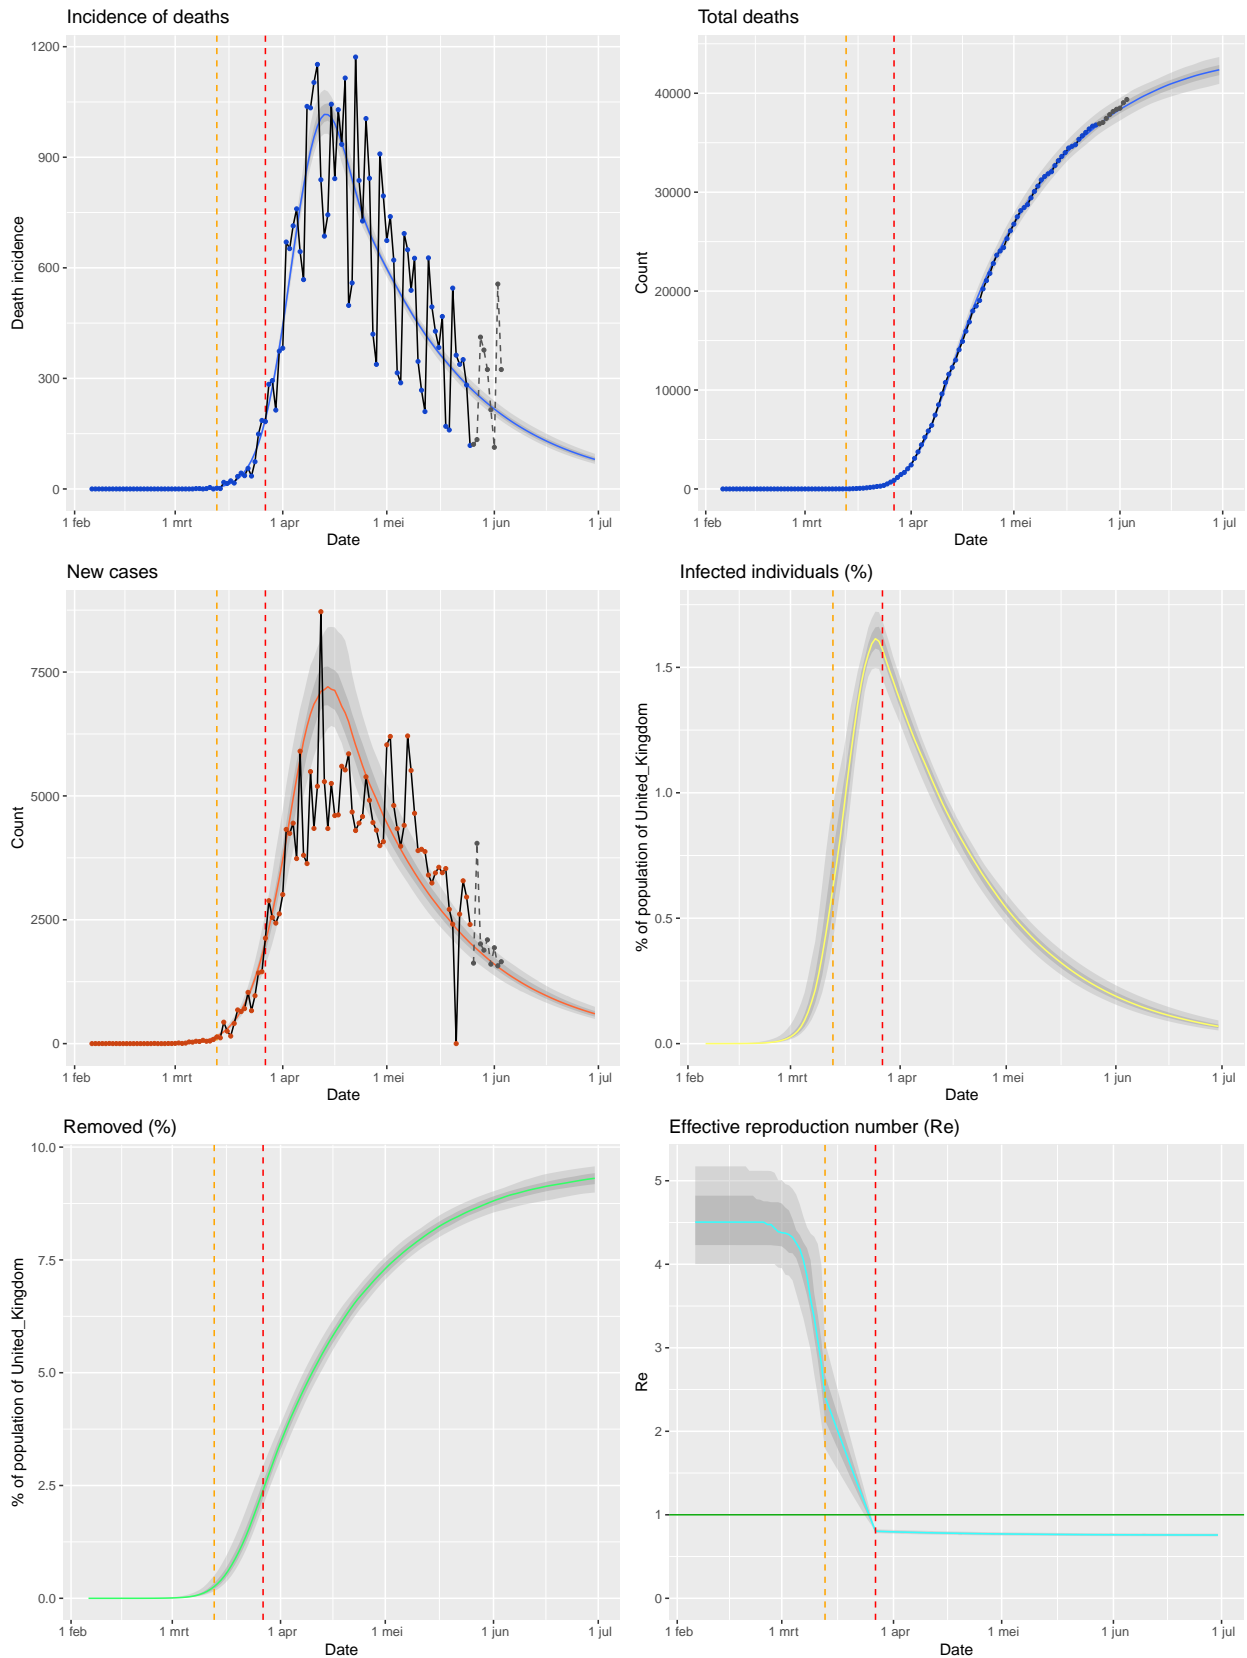

# 35 United States of America

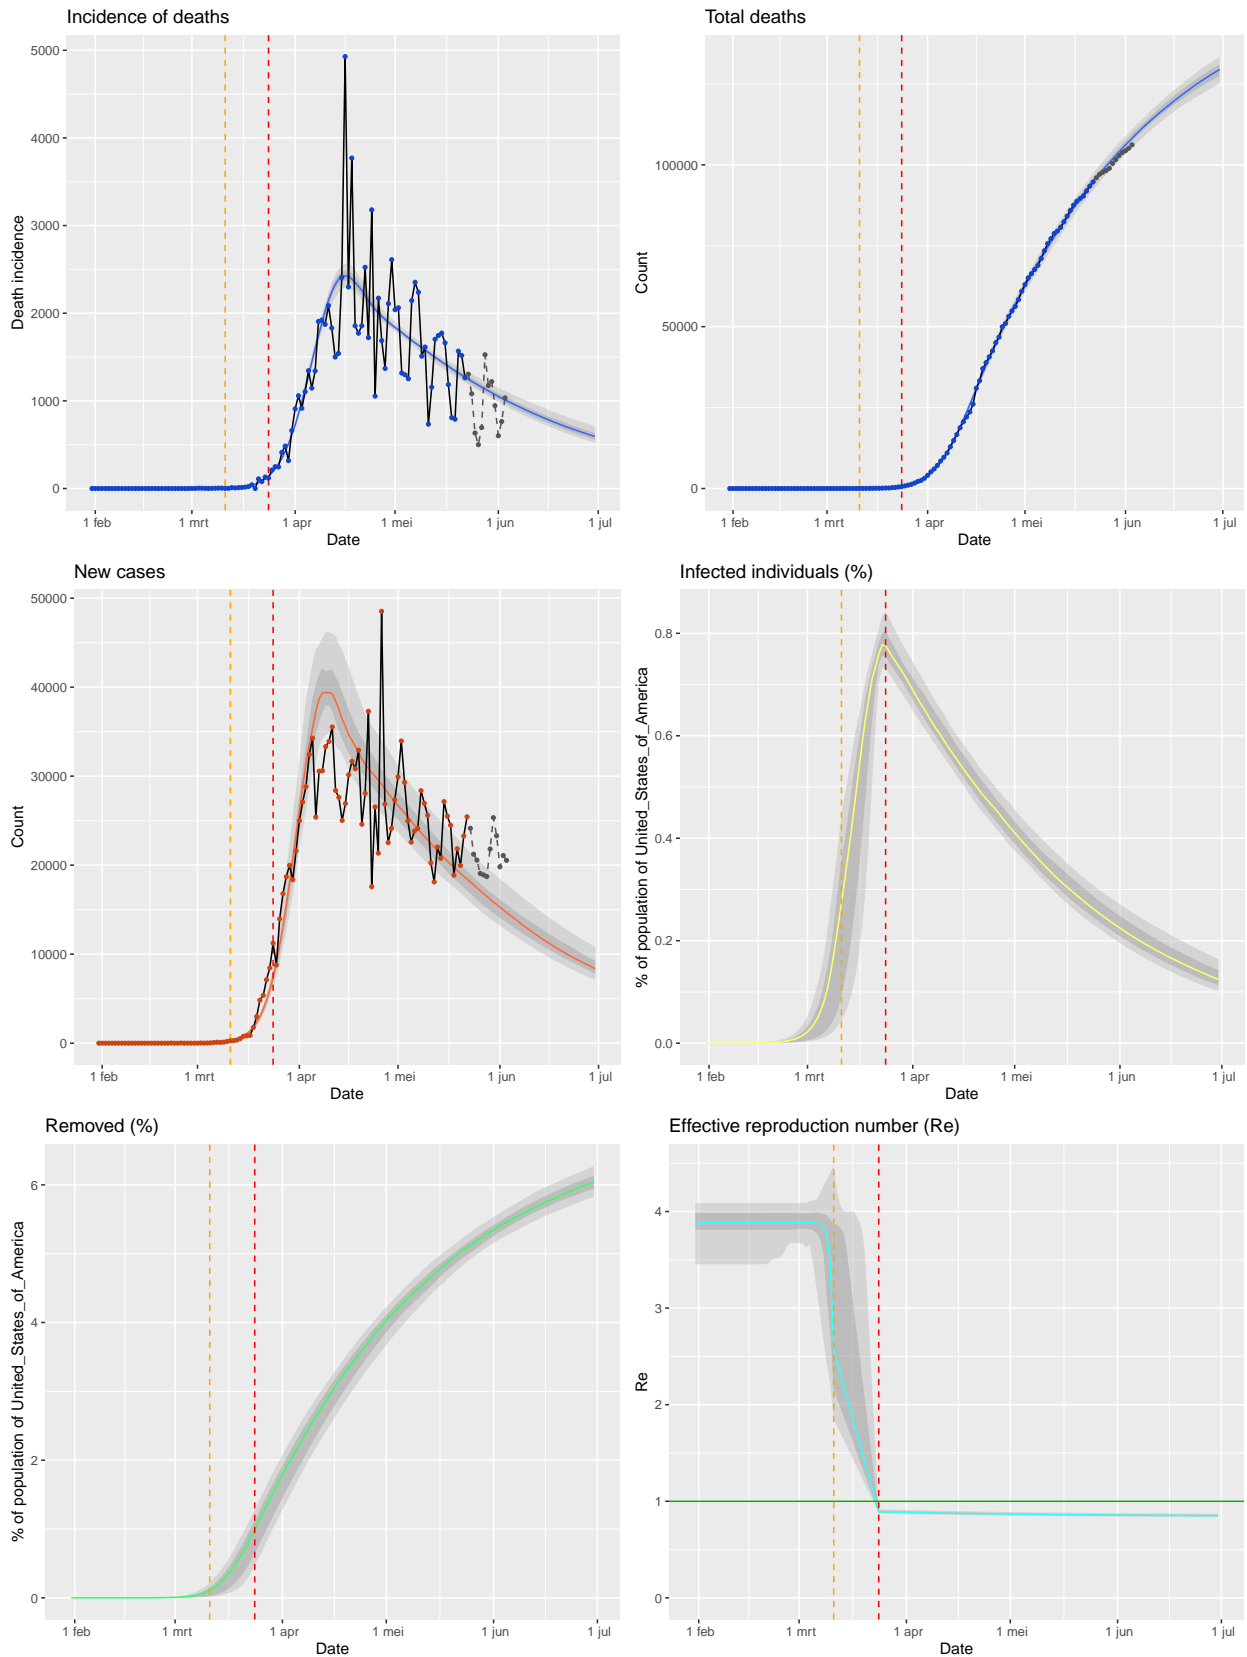

Supplement: 12889_2021_10676_MOESM4_ESM.pdf [file 12889_2021_10676_MOESM4_ESM.pdf]
