# Supplementary material
Source: PubMed Central journal article supplement (PMC8022667)
Supplement: 12889_2021_10676_MOESM2_ESM.pdf [file 12889_2021_10676_MOESM2_ESM.pdf]

# Supplementary material 2: Data and analysis scripts

Here we describe the organization of the github repository which contains the data files and scripts that can be used to reproduce the results.

## 1 Source code and data

The source code and analysis files are hosted at: <https://github.com/kdeforche/epi-western-analysis>. Here we describe the main analysis scripts, data files, and steps to do the analysis.

### 1.1 R analysis scripts

**R/data/ecdc/data.R** script for estimating  $d_1$  and  $d_2$  from Google Mobility data, and reading and preparing ECDC data for one country for analysis.

**R/models/model-tv2-cmp.R** model used for main analysis.

**R/models/model-tv3p-cmp.R** model with informative priors and an additional transition point in  $R_t$ .

**R/models/model-tv2p-cmp.R** model with informative priors used as baseline for model testing for *model-tv3p*.

**R/MCMC/fitMCMC-drj.R** R script to estimate the model parameters using MCMC for one data set.

**R/MCMC/analyzeMCMC.R** R script to analyze an estimated model for one data set.

**analyses/ecdc/analysis.R** R script to calculate cross-country statistics

### 1.2 Data files

**R/data/ecdc/ecdc.csv** Data of incidence and deaths retrieved from ECDC <https://opendata.ecdc.europa.eu/covid19/casedistribution/csv> on 6 June 2020.

**R/data/ecdc/Global\_Mobility\_Report.csv** Google Mobility Report retrieve fromd Google <https://www.google.com/covid19/mobility/> on 4 May 2020.

## 2 Analysis steps

### 2.1 Bayesian model parameter estimation

To obtain a sample from the posterior distribution of parameters fitted to data for a country with 2-letter country code  $CC$ , using the `model-tv2-cmp.R`:

```
cd analyses/ecdc/tv2-cmp
Rscript ../../R/MCMC/fitMCMC-drj.R --args CC
```

The samples are subsequently analyzed to infer marginalized estimates, using :

```
Rscript ../../R/MCMC/analyzeMCMC.R --args CC
```

This results in a file `CC_analysis.csv`, a plot of key parameters for the samples `CC_sample.pdf` that were used (without burn-in), and a figure with the 6 epidemiological graphs (of Suppl 4), `CC_graphs.pdf`.

The same steps are used to estimate the other two models.

## 2.2 Statistical analyses

First combine all of the analysis CSV files (each containing 1 data line), into a single CSV file, using:

```
head -n 1 BE_analysis.csv > analysis.csv
for i in HU CA IL GR AT BA BE BY CH CZ DE EE DK ES FI FR GB HR IT LT LU IE LV MD MK NL NO PL
PT RO RS SE SI SK US; do tail -q -n1 $i_analysis.csv >> analysis.csv; done
```

Next run the commands from `analysis.R` in the folder with the resulting `analysis.csv` CSV file.
